# Supplementary material for: Impaired primordial follicle assembly in offspring ovaries from zearalenone exposed mothers involves reduced mitochondrial activity and altered epigenetics in oocytes
Source: Research Square preprint supplement (doi:10.21203/rs.3.rs-1306300/v1), 2022-02-07
Supplement: Supplementary file 1 [file 36e384399ff586d5ab41e024.csv]

Table S4 Results of differential gene expression analysis with ZEN exposure at 3 stage of follicle formation
pre-stage of PF formation															Early-stage of PF formation															Late-stage of PF formation
PD0							PD3								PD0							PD3								PD0							PD3
	p_val	avg_logFC	pct.1	pct.2	p_val_adj			p_val	avg_logFC	pct.1	pct.2	p_val_adj			gene	p_val	avg_logFC	pct.1	pct.2	p_val_adj			p_val	avg_logFC	pct.1	pct.2	p_val_adj				p_val	avg_logFC	pct.1	pct.2	p_val_adj			p_val	avg_logFC	pct.1	pct.2	p_val_adj
Tpt1	3.26E-102	-0.764675179	1	1	7.12E-98		S100a8	3.23E-10	0.681382591	0.857	0	7.05E-06			Hbb-bs	0	1.51482778	0.999	0.752	0		Uba52	8.64E-73	1.159096834	1	0.995	1.89E-68			Rps12	8.12E-93	-0.703837762	1	1	1.77E-88		Uba52	6.80E-57	1.20456649	1	1	1.48E-52
Hbb-bs	1.40E-101	1.39721459	1	0.862	3.07E-97		Hist1h2ap	1.93E-08	0.893021461	0.929	0.162	0.000420897			Uba52	0	0.790444703	0.999	0.989	0		Rpl23a	1.51E-72	0.857799052	1	1	3.31E-68			Rps10	2.23E-87	-0.560724174	1	1	4.87E-83		Rpl13a	6.00E-56	1.11168892	1	0.943	1.31E-51
Rps21	1.29E-100	-0.906841693	0.994	1	2.83E-96		S100a9	1.94E-08	0.43641241	0.714	0	0.000422444			Eef1a1	0	-0.559975399	1	1	0		S100a9	4.92E-72	0.454904808	0.662	0.012	1.07E-67			Rps23	2.97E-87	0.515517795	1	1	6.49E-83		Cox6a1	1.33E-56	1.029172846	1	0.995	2.91E-52
Rpl30	2.13E-98	-0.858756816	0.994	1	4.65E-94		Camp	1.94E-08	0.43156375	0.714	0	0.000422444			Tpt1	0	-0.756389219	0.996	1	0		Rpl31	3.18E-71	0.990613497	1	1	6.95E-67			Hbb-bs	1.44E-84	0.895140932	0.997	0.809	3.15E-80		Rpl31	3.26E-56	0.989042	1	1	7.12E-52
Rps12	3.39E-96	-0.8104339	0.997	1	7.40E-92		Gkap1	9.85E-08	-0.967247392	1	1	0.002149353			Rps21	0	-0.769386635	0.999	1	0		Rps10	1.54E-69	-0.649921555	1	1	3.36E-65			Rpl23a	2.97E-84	0.660179844	1	1	6.47E-80		Rpl23a	9.52E-57	0.937550276	1	1	2.08E-52
Uba52	3.21E-93	0.853613504	0.997	1	7.01E-89		Cul3	1.11E-07	-1.202723759	0.929	1	0.002413699			Rps12	0	-0.850473467	0.998	1	0		S100a8	1.69E-69	0.547217801	0.662	0.019	3.69E-65			Rpl14	4.62E-84	0.551128485	1	1	1.01E-79		Tmsb10	1.57E-53	0.834875993	1	1	3.42E-49
Rpl4	1.60E-92	0.703633541	1	1	3.49E-88		Rps10	1.24E-07	-0.82137678	1	1	0.002709385			Gm42418	0	-1.315211923	0.776	0.999	0		Rpl35	1.23E-68	0.78677537	1	1	2.68E-64			Uba52	4.50E-83	0.761034311	1	0.997	9.82E-79		Rpl35	5.23E-56	0.817081092	1	1	1.14E-51
Rps24	7.16E-92	-0.671038282	0.997	1	1.56E-87		mt-Nd2	1.24E-07	-1.64726194	1	1	0.002709385			Rps24	3.72E-306	-0.641547687	1	0.999	8.11E-302		mt-Co2	4.32E-65	-1.390799484	0.994	1	9.42E-61			Rpl31	6.08E-83	0.694265356	1	1	1.33E-78		Rps17	1.98E-55	0.796487977	1	1	4.33E-51
Rpl12	4.93E-90	-0.676055895	0.997	1	1.08E-85		Rpl31	1.96E-07	0.778368267	1	1	0.004282965			Rpl31	1.07E-304	0.705422246	1	0.997	2.33E-300		Rpl13a	2.04E-64	1.039611526	0.974	0.944	4.44E-60			Hnrnpa0	1.07E-82	-0.95218885	0.435	0.94	2.34E-78		Rnaset2a	1.89E-37	0.724690463	1	0.995	4.12E-33
Hba-a1	1.73E-89	1.155878827	0.943	0.384	3.77E-85		Uba52	2.20E-07	1.131931315	1	1	0.004797267			Rpl14	9.99E-303	0.543332708	0.999	1	2.18E-298		mt-Nd3	3.21E-64	-1.328406888	0.844	0.984	7.00E-60			Eef1a1	1.40E-82	-0.533678691	1	1	3.05E-78		Polr2l	7.18E-44	0.717809027	0.982	0.951	1.57E-39
Rpl31	4.19E-89	0.674216082	1	1	9.15E-85		mt-Co2	2.20E-07	-1.64291968	0.929	1	0.004797267			Rps10	1.07E-300	-0.607750744	1	0.999	2.34E-296		Tpt1	8.46E-64	-0.534836961	1	1	1.85E-59			Cul3	5.29E-82	-0.915773587	0.696	0.972	1.16E-77		Rpl4	3.50E-51	0.697273627	1	1	7.64E-47
Cul3	7.73E-86	-0.821456215	0.866	1	1.69E-81		mt-Nd3	2.31E-07	-1.423002637	0.786	0.973	0.00504461			Cul3	9.11E-297	-0.97117992	0.674	0.966	1.99E-292		Cul3	1.15E-63	-0.904197937	0.656	0.984	2.52E-59			Rps19	7.15E-82	0.582846783	1	1	1.56E-77		Nop53	7.20E-34	0.672998589	0.955	0.948	1.57E-29
Rps17	1.83E-83	0.624749166	1	0.997	3.99E-79		mt-Nd4l	2.46E-07	-1.233657545	0.786	1	0.005357623			Rpl23a	8.78E-288	0.684729866	1	0.998	1.92E-283		mt-Nd2	1.32E-63	-1.376731078	0.974	0.998	2.88E-59			Ybx3	7.20E-82	-0.979690916	0.615	0.969	1.57E-77		Selenow	9.96E-13	0.643683778	0.982	0.935	2.17E-08
Rps20	8.54E-80	-0.573572988	0.997	1	1.86E-75		Rpl23a	2.75E-07	0.953395722	1	1	0.006010772			Rps19	7.33E-286	0.541163433	0.999	1	1.60E-281		Hnrnpa0	2.11E-63	-0.909358038	0.461	0.965	4.59E-59			Rps21	4.81E-76	-0.611323655	1	1	1.05E-71		Anapc13	1.91E-38	0.641450414	0.973	0.981	4.17E-34
Rpl23	1.62E-78	-0.463100624	1	1	3.53E-74		Rpl4	4.80E-07	0.827491283	1	1	0.010483151			Rpl12	9.14E-283	-0.640832055	0.998	1	1.99E-278		Cox6a1	3.17E-63	0.965033221	1	0.998	6.91E-59			Gkap1	1.68E-75	-0.70563719	0.94	0.997	3.68E-71		Ndufa3	2.69E-39	0.638148712	1	0.997	5.88E-35
Rpl5	2.02E-78	-0.572135306	0.994	1	4.40E-74		Rps24	4.80E-07	-0.860367759	1	1	0.010483151			Ybx3	1.90E-282	-0.923693037	0.507	0.929	4.14E-278		Rpsa	3.68E-63	-0.694073733	1	1	8.04E-59			Tpt1	4.51E-75	-0.548660983	1	1	9.84E-71		Rps6	5.16E-50	0.632067236	1	1	1.13E-45
Gkap1	2.52E-78	-0.693225397	0.934	0.994	5.51E-74		Csnk2a2	5.25E-07	-1.080309938	0.357	0.946	0.011465007			Gkap1	7.25E-280	-0.76925177	0.907	0.995	1.58E-275		Ybx3	6.44E-62	-0.951015657	0.545	0.993	1.40E-57			Rps24	7.98E-75	-0.503442584	1	1	1.74E-70		Ndufa2	7.37E-47	0.627734862	1	1	1.61E-42
mt-Co2	1.47E-77	-1.202248149	0.997	0.994	3.21E-73		Rpl13a	7.29E-07	0.945497798	1	0.838	0.015907869			Hba-a1	7.86E-275	1.702602623	0.941	0.37	1.71E-270		Rpl4	9.75E-61	0.696046728	1	1	2.13E-56			Gm42418	3.22E-74	-1.221428458	0.739	0.997	7.02E-70		Tomm6	8.92E-37	0.618912624	0.964	0.807	1.95E-32
Ybx3	5.17E-77	-0.757149799	0.56	0.975	1.13E-72		Hnrnpa0	7.30E-07	-0.841225037	0.357	0.946	0.015933687			Cox6a1	3.13E-249	0.735071524	0.995	0.946	6.82E-245		Hbb-bs	3.98E-60	-0.483814374	0.974	0.799	8.68E-56			Rpl12	2.41E-73	-0.531763499	1	1	5.27E-69		Kpna2	1.86E-30	0.614255321	0.955	0.967	4.06E-26
Rps18	1.38E-76	0.584026014	1	1	3.00E-72		Ybx3	8.74E-07	-0.939035829	0.286	0.946	0.019063911			Rps18	8.42E-246	0.488405682	1	0.999	1.84E-241		Rps23	7.45E-59	0.536728689	1	1	1.63E-54			Hba-a1	3.57E-72	1.156028979	0.96	0.423	7.79E-68		Grcc10	2.23E-35	0.612956761	0.928	0.696	4.86E-31
Rpl23a	1.35E-75	0.615740064	1	1	2.94E-71		Tpt1	9.23E-07	-0.680191065	1	1	0.020145954			Rps14	1.39E-241	0.437298742	1	1	3.03E-237		Gkap1	3.96E-58	-0.690654257	0.903	1	8.65E-54			Cct2	1.01E-71	-0.55981333	0.993	1	2.21E-67		Rps27	1.93E-42	0.601304038	1	1	4.20E-38
Hba-a2	1.06E-73	0.948638878	0.883	0.321	2.31E-69		Hbb-bs	1.25E-06	-1.242772712	1	0.703	0.027338509			Rps17	1.08E-238	0.505579587	1	0.998	2.35E-234		Rpl27	3.28E-57	0.566870784	1	1	7.15E-53			Rpl18a	2.27E-71	0.477816666	1	1	4.95E-67		Rpl10	1.40E-46	0.599962498	1	1	3.06E-42
Eef1a1	1.23E-72	-0.472034595	1	1	2.69E-68		Rpl23	2.39E-06	-0.607647026	1	1	0.052133362			Rps6	3.10E-236	0.448283282	1	0.999	6.77E-232		Rps19	4.52E-57	0.603239786	1	1	9.87E-53			Rpsa	7.70E-71	-0.50330113	1	1	1.68E-66		Phb	3.78E-38	0.595453114	0.982	0.97	8.24E-34
Rpl35	3.20E-72	0.507205877	1	1	6.99E-68		mt-Nd4	2.94E-06	-1.04848493	0.929	1	0.064095054			Rps23	1.16E-234	0.446527917	1	1	2.53E-230		Csnk2a2	6.88E-57	-0.712590126	0.468	0.951	1.50E-52			Rpl4	8.34E-71	0.474121171	1	0.997	1.82E-66		Rpl27	3.57E-48	0.584914888	1	1	7.79E-44
Rps6	5.37E-72	0.520129529	1	1	1.17E-67		Pclaf	3.57E-06	0.321253431	0.643	0.054	0.077836035			Hnrnpa0	7.22E-234	-0.80774074	0.345	0.844	1.58E-229		Egln1	1.12E-55	-0.605780275	0.292	0.914	2.44E-51			Rpl35	1.67E-70	0.490062793	1	1	3.65E-66		Rps23	1.22E-52	0.57582922	1	1	2.66E-48
Hnrnpa0	9.18E-72	-0.64244175	0.331	0.947	2.00E-67		Rpl27	3.99E-06	0.452591893	1	1	0.087094293			Rpl4	6.78E-232	0.521918628	0.998	0.999	1.48E-227		Cct2	1.91E-55	-0.572522448	1	1	4.16E-51			Cox6a1	3.45E-70	0.755920862	0.993	0.978	7.53E-66		Rps19	5.05E-50	0.575204866	1	1	1.10E-45
Gm42418	7.35E-69	-0.814668721	0.957	1	1.60E-64		mt-Co3	3.99E-06	-0.928790426	1	1	0.087094293			Rpl35	1.71E-223	0.469906031	1	0.999	3.73E-219		Mbd2	1.22E-54	-0.584191108	0.195	0.902	2.67E-50			Rps27	4.28E-69	0.472424907	1	1	9.34E-65		Rnaset2b	3.50E-34	0.57165769	0.991	0.967	7.65E-30
mt-Nd3	4.12E-68	-1.036755074	0.866	0.947	8.98E-64		Erh	4.42E-06	0.61686415	1	0.973	0.096384124			Rpl5	6.13E-220	-0.487759357	0.997	0.998	1.34E-215		Rplp2	4.84E-54	0.474214095	1	1	1.06E-49			Rps14	2.74E-68	0.443741944	1	1	5.99E-64		Pfn1	6.83E-34	0.568784355	1	1	1.49E-29
Rps19	5.96E-68	0.569155943	1	1	1.30E-63		Supt16	4.42E-06	-0.824055305	1	1	0.096384124			Rack1	1.77E-218	-0.559377486	0.976	0.998	3.86E-214		Rps6	5.98E-53	0.545938737	1	1	1.31E-48			Csnk2a2	3.60E-68	-0.735869324	0.465	0.903	7.86E-64		Anapc11	5.85E-38	0.561847896	1	0.997	1.28E-33
Rpl13a	1.56E-67	0.780849762	0.98	0.94	3.40E-63		Mbd2	4.55E-06	-0.574328363	0	0.811	0.09930729			Hba-a2	1.02E-217	1.45556119	0.872	0.308	2.24E-213		Rps17	7.74E-53	0.62155089	1	1	1.69E-48			Rpl5	5.48E-67	-0.529711949	0.993	1	1.20E-62		Uqcr11	7.31E-43	0.560427496	1	1	1.59E-38
Rps10	1.80E-67	-0.534154431	0.994	1	3.93E-63		Ptp4a2	4.85E-06	-0.767963736	0.429	0.919	0.105755989			Rpsa	9.58E-217	-0.516382375	0.998	1	2.09E-212		Rpl37a	2.85E-52	0.502574206	1	1	6.21E-48			Rack1	6.43E-67	-0.538903722	0.973	0.997	1.40E-62		Phpt1	2.02E-28	0.556244585	0.874	0.69	4.41E-24
mt-Nd2	1.11E-66	-1.014220573	0.986	0.991	2.41E-62		mt-Atp6	6.60E-06	-0.94045249	1	1	0.143948523			Kif2a	2.65E-214	-0.74931603	0.648	0.926	5.78E-210		Wdfy1	2.98E-52	-0.550667415	0.156	0.864	6.50E-48			Rps6	2.36E-65	0.403541167	1	1	5.15E-61		Hba-a1	8.56E-52	0.551841109	0.946	0.389	1.87E-47
Rpl14	4.09E-66	0.531162528	1	1	8.92E-62		Cop1	8.00E-06	-0.616811527	0.429	0.919	0.174506062			Supt16	4.35E-206	-0.671494455	0.906	0.984	9.50E-202		Rps27	1.08E-51	0.570711375	1	1	2.36E-47			Kif2a	3.49E-65	-0.742948884	0.662	0.947	7.61E-61		Atp5l	6.03E-45	0.550601694	1	1	1.32E-40
Rps27	3.26E-65	0.446490823	1	1	7.11E-61		Cox6a1	8.04E-06	0.559111135	1	1	0.175465579			Rps20	1.09E-205	-0.571850241	1	1	2.39E-201		Rab21	4.01E-51	-0.652143865	0.429	0.939	8.76E-47			Hba-a2	6.26E-64	1.132907029	0.903	0.373	1.37E-59		Hmga1	7.78E-29	0.550500886	0.892	0.851	1.70E-24
Eid2	8.31E-65	-0.422384602	0.106	0.799	1.81E-60		Ndufa1	8.04E-06	0.508541037	1	1	0.175465579			Cct2	6.94E-204	-0.506899731	0.986	1	1.51E-199		Rpl14	1.72E-50	0.463931533	1	1	3.76E-46			Rps18	1.13E-62	0.412654206	1	1	2.47E-58		Gm11808	4.66E-30	0.548863484	0.955	0.938	1.02E-25
mt-Nd4l	9.03E-65	-0.922042682	0.826	0.947	1.97E-60		Rps6	8.87E-06	0.597489096	1	1	0.193600047			Csnk2a2	1.37E-202	-0.724238761	0.414	0.834	2.98E-198		Kcmf1	4.34E-50	-0.629014451	0.708	0.967	9.46E-46			Wdfy1	4.15E-61	-0.572849664	0.194	0.793	9.05E-57		Rpl41	2.06E-43	0.546196318	1	1	4.49E-39
Rack1	5.50E-64	-0.580214231	0.991	1	1.20E-59		Hsp90ab1	8.87E-06	-0.526177187	1	1	0.193600047			Rps27	8.98E-193	0.430265774	0.999	0.999	1.96E-188		Rpl41	4.78E-49	0.53536069	1	1	1.04E-44			Rab21	4.60E-60	-0.656023313	0.395	0.875	1.00E-55		Bloc1s1	2.84E-34	0.530910993	0.946	0.864	6.20E-30
Wtip	2.55E-62	-0.437745374	0.163	0.862	5.57E-58		Mrpl27	9.74E-06	0.454488963	1	0.703	0.212568117			Wdfy1	8.74E-189	-0.591587742	0.156	0.698	1.91E-184		Rps24	1.16E-48	-0.54376359	1	1	2.54E-44			Rps17	4.39E-59	0.449628894	1	1	9.58E-55		Mrps21	2.41E-37	0.524224475	1	0.997	5.25E-33
Cox6a1	1.61E-61	0.624080791	0.994	0.978	3.51E-57		Rpl12	1.08E-05	-0.637301404	1	1	0.235383015			Rpl30	4.77E-187	-0.608268043	0.993	0.996	1.04E-182		Camp	1.71E-47	0.266120902	0.468	0.009	3.74E-43			Mael	4.33E-57	0.667145042	0.987	0.959	9.46E-53		S100a8	2.88E-73	0.521637742	0.775	0.011	6.29E-69
Rpl22	3.45E-61	-0.445201293	1	1	7.52E-57		Nop10	1.16E-05	0.608986996	1	0.811	0.252839879			Rpl23	4.46E-184	-0.360182658	1	1	9.74E-180		mt-Nd4l	2.06E-47	-0.784584991	0.695	0.97	4.49E-43			Usp7	7.01E-57	-0.674644864	0.699	0.947	1.53E-52		Rpl37a	4.69E-47	0.51873813	1	1	1.02E-42
Rps14	2.87E-60	0.444954735	1	1	6.27E-56		Slbp	1.19E-05	0.704357077	1	0.946	0.259259034			Rpl13a	3.70E-181	0.670287134	0.92	0.771	8.08E-177		Rps3a1	1.69E-46	-0.400330108	1	1	3.69E-42			Supt16	1.90E-56	-0.63519614	0.93	0.997	4.14E-52		Cox6b2	2.90E-19	0.501502111	0.991	0.965	6.32E-15
Kif2a	4.70E-60	-0.616318928	0.737	0.975	1.02E-55		Ier3ip1	1.31E-05	0.646554381	1	0.946	0.285565894			Rpl22	7.46E-177	-0.452581626	0.998	0.999	1.63E-172		Rps14	2.12E-46	0.409048202	1	1	4.62E-42			Rpl13a	9.23E-55	0.60249586	0.94	0.865	2.01E-50		Bola2	7.89E-31	0.499652459	1	0.997	1.72E-26
Eef1b2	1.62E-59	-0.638137478	0.989	1	3.53E-55		Rpl27a	1.44E-05	-0.467756495	1	1	0.314548079			Eid2	1.50E-174	-0.517595739	0.146	0.668	3.27E-170		Atp5l	1.59E-45	0.53435613	1	1	3.47E-41			Rpl41	2.88E-53	0.406698426	1	1	6.28E-49		Rps28	1.50E-37	0.49897505	1	1	3.27E-33
Tcfl5	4.48E-59	-0.525871592	0.334	0.915	9.79E-55		Hba-a2	1.51E-05	-0.875623474	0.929	0.216	0.32887445			Rab21	1.50E-165	-0.587337468	0.316	0.762	3.28E-161		Kif2a	3.96E-45	-0.597313233	0.643	0.96	8.64E-41			Egln1	3.20E-53	-0.561265332	0.365	0.824	6.99E-49		Rpl14	3.03E-49	0.498111749	1	1	6.61E-45
Csnk2a2	1.14E-57	-0.58141195	0.509	0.95	2.48E-53		Cct2	1.59E-05	-0.597779258	0.929	1	0.346167716			Hsp90ab1	4.44E-162	-0.367148484	1	1	9.69E-158		Usp7	6.39E-45	-0.650328842	0.682	0.965	1.40E-40			Rps20	4.46E-53	-0.428876586	1	1	9.73E-49		Cox17	2.30E-31	0.497434287	1	1	5.01E-27
Wdfy1	7.56E-57	-0.443892427	0.186	0.833	1.65E-52		Hba-a1	1.71E-05	-0.554133403	1	0.432	0.372686886			Egln1	7.78E-161	-0.568557314	0.284	0.742	1.70E-156		Rps12	8.51E-45	-0.503575741	1	1	1.86E-40			Brd1	6.80E-53	-0.536181068	0.311	0.818	1.48E-48		Morf4l1	3.36E-34	0.488152207	1	1	7.33E-30
Supt16	1.27E-55	-0.576966542	0.943	0.994	2.77E-51		Smad4	1.99E-05	-0.743624061	0.357	0.865	0.435242672			Eef1b2	4.68E-159	-0.566368349	0.947	0.988	1.02E-154		Rps20	2.52E-44	-0.525549571	1	1	5.50E-40			Kcmf1	1.07E-52	-0.640124278	0.642	0.928	2.35E-48		Cox6c	2.86E-40	0.479154859	1	1	6.24E-36
Rpl18a	1.43E-55	0.496821044	1	1	3.13E-51		Prdx1	2.11E-05	0.772412996	1	1	0.460227596			Tcfl5	1.06E-158	-0.552075684	0.31	0.748	2.32E-154		mt-Co3	5.06E-44	-0.700312981	1	1	1.10E-39			Rnaset2a	1.19E-52	0.549527431	0.997	0.975	2.59E-48		Rpl18a	2.08E-46	0.474774394	1	1	4.54E-42
Cirbp	8.37E-55	0.578602809	1	0.997	1.83E-50		Egln1	2.29E-05	-0.561402213	0.071	0.784	0.500150831			Ppp4c	3.01E-156	0.572509288	0.918	0.771	6.57E-152		Polr2l	6.14E-44	0.634760418	0.968	0.93	1.34E-39			Mbd2	2.55E-52	-0.416704746	0.181	0.774	5.57E-48		Ier3ip1	4.12E-23	0.471350677	0.982	0.91	8.99E-19
Rpl27a	1.17E-54	-0.387286458	1	1	2.56E-50		Glul	2.48E-05	0.339005553	0.571	0.054	0.54018483			Mael	2.81E-152	0.47058284	0.992	0.984	6.14E-148		Supt16	8.96E-44	-0.646364339	0.903	0.998	1.96E-39			Eid2	3.14E-52	-0.432862768	0.191	0.749	6.86E-48		Rplp2	4.23E-47	0.471116129	1	1	9.24E-43
Rpl27	7.48E-52	0.371794015	1	1	1.63E-47		Rplp2	2.54E-05	0.467283015	1	1	0.555269237			Hspd1	4.98E-152	-0.395918591	0.99	0.998	1.09E-147		Morf4l1	1.10E-43	0.587519045	0.994	1	2.39E-39			Fxr1	1.06E-51	-0.519440507	0.92	0.984	2.31E-47		Uqcr10	8.18E-32	0.467474973	0.991	1	1.79E-27
Brd1	2.42E-51	-0.493520621	0.303	0.874	5.27E-47		Rsrp1	2.78E-05	0.713907901	1	0.892	0.606982854			Mbd2	8.60E-152	-0.428684514	0.108	0.598	1.88E-147		Uqcr11	4.46E-43	0.55540735	1	1	9.73E-39			Rcc2	5.33E-51	-0.589911941	0.448	0.897	1.16E-46		Tmem256	3.82E-22	0.461680709	0.955	0.91	8.34E-18
mt-Co3	5.50E-51	-0.565630447	1	1	1.20E-46		Hspa4	2.79E-05	-0.553759082	1	1	0.609524762			S100a8	2.45E-151	0.409839684	0.435	0.005	5.34E-147		Rpl18a	2.96E-42	0.39195581	1	1	6.45E-38			Ppp4c	2.55E-50	0.563328105	0.943	0.903	5.56E-46		Rpl36al	2.69E-36	0.459445284	1	1	5.87E-32
Rab21	7.34E-51	-0.445842931	0.283	0.874	1.60E-46		4933425L06Rik	2.96E-05	0.41319289	0.786	0.162	0.646547786			Ube2m	2.96E-149	-0.582229263	0.624	0.923	6.45E-145		Ndufa2	3.34E-42	0.5316083	1	0.995	7.29E-38			Rpl22	1.70E-49	-0.387589291	1	1	3.71E-45		Oaz2	1.06E-25	0.459400162	0.883	0.788	2.32E-21
Mbd2	6.88E-50	-0.313603455	0.114	0.733	1.50E-45		Cd27	3.07E-05	0.251009171	0.429	0	0.670536937			Rps3a1	1.09E-148	-0.285656511	1	1	2.38E-144		Eef1b2	4.17E-42	-0.585205796	0.974	1	9.10E-38			Alyref	9.72E-49	-0.552902533	0.843	0.991	2.12E-44		Eef1g	4.85E-30	0.457829342	1	1	1.06E-25
Rpl38	1.02E-49	-0.374443833	1	1	2.23E-45		Gstm2	3.15E-05	0.327372895	0.929	0.216	0.688085905			Rpl18a	2.02E-147	0.442209559	1	1	4.42E-143		Uqcr10	8.16E-42	0.531203445	1	0.993	1.78E-37			Hsp90ab1	1.35E-48	-0.355717637	1	1	2.95E-44		Erh	1.49E-27	0.456183505	0.982	0.932	3.26E-23
mt-Nd6	3.63E-49	-0.352339381	0.097	0.676	7.92E-45		Rpl35	3.68E-05	0.456100252	1	1	0.804163598			Brd1	1.36E-145	-0.566373058	0.29	0.71	2.97E-141		mt-Nd4	1.40E-41	-0.691286202	1	0.998	3.06E-37			Tcfl5	2.09E-48	-0.482226871	0.304	0.793	4.56E-44		Ap2s1	6.55E-29	0.44778122	0.982	0.984	1.43E-24
Mael	8.79E-49	0.511465102	0.994	1	1.92E-44		Maf1	3.69E-05	0.472685182	1	0.703	0.805981189			Pcbp2	5.25E-145	0.44957393	0.982	0.956	1.15E-140		Erh	2.14E-41	0.532616458	0.968	0.977	4.66E-37			Samd1	8.98E-48	-0.451279462	0.204	0.749	1.96E-43		Asna1	8.85E-26	0.44236577	0.937	0.957	1.93E-21
Rps23	2.44E-48	0.389624289	1	1	5.31E-44		4930469K13Rik	4.42E-05	0.414970595	0.5	0.027	0.964016717			Kcmf1	2.06E-140	-0.557387654	0.572	0.876	4.49E-136		Ndufa3	1.33E-40	0.658264752	0.981	0.988	2.90E-36			Eef1b2	3.74E-47	-0.482937215	0.97	1	8.17E-43		Ndufv3	1.18E-26	0.441496485	0.991	0.984	2.58E-22
Eif3g	4.10E-48	0.45464312	0.994	0.994	8.95E-44		Ranbp1	4.84E-05	0.425686795	1	1	1			Hbb-bt	1.82E-139	0.827577374	0.702	0.245	3.96E-135		Eid2	1.49E-40	-0.374708647	0.091	0.75	3.26E-36			Ranbp1	2.96E-46	0.408544023	1	0.984	6.46E-42		Rps27rt	3.68E-16	0.439999668	0.955	0.976	8.02E-12
mt-Nd4	1.20E-47	-0.58768511	0.997	0.987	2.61E-43		Gstm6	5.10E-05	0.311361407	0.5	0.027	1			mt-Nd1	9.60E-138	0.792792544	0.997	0.916	2.09E-133		Rpl23	1.65E-40	-0.316702802	1	1	3.59E-36			Rnaset2b	4.88E-46	0.535264611	0.973	0.966	1.07E-41		Rps14	4.28E-44	0.436017327	1	1	9.34E-40
Cox4i1	6.42E-45	0.280664915	1	1	1.40E-40		Smap1	5.29E-05	-0.611876459	0.786	1	1			Alyref	3.62E-136	-0.519925435	0.794	0.979	7.89E-132		Rnaset2a	2.36E-40	0.733868565	0.987	0.993	5.15E-36			Rps27l	5.77E-46	0.373740035	1	1	1.26E-41		Hist1h2ap	0.002922443	0.434678885	0.595	0.584	1
Copb2	4.22E-44	-0.413596839	0.977	1	9.20E-40		Nop53	5.95E-05	0.698437439	0.929	0.541	1			Cirbp	8.62E-136	0.412983793	0.998	0.988	1.88E-131		Hmga1	2.47E-40	0.71655321	0.916	0.82	5.38E-36			Hspd1	3.96E-45	-0.386560909	0.997	1	8.64E-41		Ndufb2	5.17E-26	0.434080005	1	1	1.13E-21
Rnf17	5.53E-44	-0.522861223	0.854	0.975	1.21E-39		Rpl5	6.34E-05	-0.418524553	1	1	1			Eef1g	2.62E-133	0.394221737	0.995	0.985	5.72E-129		Rpl37	2.56E-40	0.387905116	1	1	5.59E-36			Rps3a1	4.66E-45	-0.262501197	1	1	1.02E-40		Marf1	0.001075346	0.428868937	0.892	0.957	1
Hbb-bt	2.56E-43	0.586077525	0.709	0.314	5.58E-39		Rpsa	6.34E-05	-0.524480504	1	1	1			Hspa4	3.98E-133	-0.499237995	0.895	0.979	8.68E-129		Rps28	5.44E-40	0.548199718	1	1	1.19E-35			Ube2d3	1.04E-44	0.374780797	1	1	2.28E-40		Snrpg	1.33E-28	0.426745123	1	0.997	2.91E-24
Cct2	4.67E-43	-0.411766579	0.983	1	1.02E-38		BC037034	6.59E-05	0.395513003	0.857	0.324	1			Copb2	1.50E-131	-0.436277628	0.926	0.984	3.26E-127		Snrpg	1.06E-39	0.53510812	1	0.995	2.31E-35			Rpl37a	2.77E-44	0.3151771	1	1	6.04E-40		Prdx1	9.93E-08	0.426244151	1	1	0.002167116
Gm11808	9.78E-42	0.499424221	0.96	0.947	2.13E-37		Slk	7.31E-05	-0.800281955	0.357	0.838	1			Usp7	1.15E-129	-0.574948823	0.566	0.855	2.51E-125		Cox7c	1.57E-39	0.460405941	1	1	3.43E-35			Pak1ip1	6.82E-44	-0.431159329	0.97	0.994	1.49E-39		Romo1	1.07E-22	0.42499783	0.955	0.957	2.34E-18
mt-Nd5	1.31E-40	-0.600677364	0.937	0.947	2.86E-36		Oaz2	8.16E-05	0.618206839	1	0.838	1			Rpl41	3.05E-128	0.391487404	1	1	6.65E-124		Hsp90ab1	1.62E-39	-0.414694495	1	1	3.53E-35			Oaz2	1.82E-43	0.575611881	0.9	0.787	3.96E-39		Rps15	4.67E-44	0.424019495	1	1	1.02E-39
Rock1	2.49E-40	-0.453937351	0.951	1	5.44E-36		Ube2s	9.03E-05	0.56117105	1	1	1			Sap30l	3.07E-127	-0.523660698	0.569	0.865	6.70E-123		Sap18	5.03E-39	0.507533474	1	0.995	1.10E-34			Rps28	2.60E-43	0.346181439	1	1	5.67E-39		Npm2	0.322472755	0.422669523	0.387	0.508	1
Rpl36	3.57E-40	0.373035309	1	1	7.80E-36		Rpl14	9.03E-05	0.409573129	1	1	1			Ptges3	2.14E-124	-0.429225797	0.908	0.979	4.67E-120		Phb	9.14E-38	0.57220663	0.955	0.958	1.99E-33			S100a8	3.20E-43	0.383216618	0.488	0.009	6.98E-39		Rpl37	5.32E-39	0.422320982	1	1	1.16E-34
Egln1	6.21E-40	-0.35516781	0.263	0.814	1.36E-35		Rps21	9.03E-05	-0.583639079	1	1	1			Rpl27a	4.88E-122	-0.287154965	1	0.999	1.07E-117		Sap30l	9.18E-38	-0.50907113	0.526	0.944	2.00E-33			Ftl1	3.56E-43	0.564857695	1	0.997	7.77E-39		Rpl36	4.47E-30	0.422048903	1	1	9.76E-26
Rbbp4	7.93E-40	-0.444451441	0.791	0.978	1.73E-35		Rpl30	9.03E-05	-0.604657283	1	1	1			1010001B22Rik	1.94E-119	0.300756473	0.348	0	4.24E-115		Cox17	9.53E-38	0.532844209	1	0.993	2.08E-33			Cirbp	1.19E-41	0.391837707	1	0.981	2.60E-37		Cox6b1	1.48E-36	0.421553248	1	1	3.22E-32
Rpl28	1.40E-39	-0.356775268	0.994	1	3.06E-35		Rpl22	9.85E-05	-0.445853427	1	1	1			Smad4	1.26E-118	-0.50034107	0.393	0.735	2.74E-114		Bloc1s1	1.18E-37	0.559916045	0.916	0.825	2.58E-33			Ube2m	5.89E-41	-0.539962478	0.639	0.956	1.29E-36		Cox7c	1.01E-31	0.420780343	1	1	2.21E-27
Smad4	4.03E-39	-0.440879674	0.5	0.899	8.79E-35		mt-Cytb	9.85E-05	-0.757707369	1	1	1			Wtip	1.70E-117	-0.384670758	0.162	0.59	3.70E-113		Eef1g	1.23E-37	0.444483766	1	1	2.69E-33			Stmn1	1.04E-40	0.480399065	0.993	0.972	2.27E-36		Gm10076	4.66E-22	0.41439039	0.973	0.951	1.02E-17
Ranbp1	6.71E-39	0.40452143	1	0.991	1.46E-34		Sqstm1	0.000101494	0.476293307	0.714	0.189	1			Gm11808	2.65E-117	0.509078169	0.92	0.801	5.79E-113		Tmsb10	1.55E-37	0.846134241	1	1	3.37E-33			Hnrnpd	1.09E-40	-0.511476677	0.682	0.934	2.37E-36		Usmg5	4.49E-23	0.412076269	0.991	0.997	9.80E-19
Eef1g	1.48E-38	0.425946862	0.997	0.997	3.22E-34		Gm4779	0.000107068	0.560609834	1	0.892	1			Rpl38	1.43E-115	-0.340749273	0.998	1	3.13E-111		Tcfl5	3.10E-37	-0.379642163	0.286	0.836	6.77E-33			Tmem147	1.55E-40	0.430807896	0.977	0.956	3.38E-36		Cox14	5.88E-26	0.410878729	0.991	0.992	1.28E-21
Rpl3	2.49E-38	0.357411646	1	0.997	5.44E-34		Dmrtc2	0.000109329	0.849159016	0.857	0.405	1			Ube2q1	1.86E-113	-0.490178325	0.553	0.834	4.05E-109		Minos1	3.63E-37	0.601216454	0.987	0.995	7.93E-33			R3hdm2	3.21E-40	-0.459088732	0.836	0.975	7.01E-36		Lsm7	9.95E-21	0.409811532	1	0.995	2.17E-16
Med28	3.09E-38	0.352915089	0.997	0.987	6.75E-34		Kif2a	0.000114836	-0.641727354	0.571	0.973	1			Oaz2	2.22E-113	0.483991944	0.85	0.663	4.84E-109		Grcc10	8.82E-37	0.636771502	0.857	0.586	1.93E-32			Minos1	4.18E-40	0.414149801	0.997	0.987	9.11E-36		Ndufa6	2.34E-25	0.407700583	1	0.997	5.10E-21
mt-Co1	4.06E-38	-0.475422247	1	0.997	8.86E-34		Uqcr10	0.000117154	0.4149925	1	1	1			Ranbp1	2.29E-113	0.35659168	0.993	0.987	4.99E-109		mt-Atp6	4.46E-36	-0.592720774	1	1	9.74E-32			Rock1	7.78E-40	-0.563117748	0.906	0.984	1.70E-35		Morf4l2	4.95E-17	0.406146119	0.955	0.924	1.08E-12
Slk	2.14E-37	-0.458559972	0.474	0.884	4.68E-33		mt-Nd5	0.000122265	-0.632926194	0.929	0.973	1			H1fx	3.90E-113	-0.614464105	0.718	0.905	8.51E-109		Ube2m	5.45E-36	-0.563757619	0.643	0.988	1.19E-31			Afdn	1.20E-39	-0.453991006	0.839	0.975	2.61E-35		Mrpl52	5.08E-13	0.400281796	0.964	0.978	1.11E-08
Rpl37a	6.45E-37	0.283998057	1	1	1.41E-32		Tcfl5	0.000123476	-0.581954945	0.286	0.811	1			Rock1	2.03E-112	-0.507879343	0.838	0.967	4.44E-108		Anapc11	3.55E-35	0.557224846	0.987	0.979	7.74E-31			1010001B22Rik	2.53E-39	0.267257368	0.435	0	5.52E-35		Nipsnap2	7.27E-20	0.396739935	0.964	0.91	1.59E-15
Samd1	1.08E-36	-0.29836062	0.134	0.638	2.37E-32		Tdrd1	0.000124233	-0.85082346	0.286	0.865	1			Eif3g	7.25E-112	0.363172346	0.981	0.979	1.58E-107		Smad4	6.87E-35	-0.442054028	0.409	0.89	1.50E-30			Eif3g	4.84E-39	0.375888597	0.99	0.987	1.06E-34		Naa38	2.86E-26	0.394421943	0.991	0.981	6.23E-22
Ppp4c	1.77E-35	0.472673817	0.914	0.877	3.87E-31		Wtip	0.000127775	-0.526737557	0	0.649	1			Stmn1	8.79E-112	0.398602478	0.987	0.973	1.92E-107		Larp1b	9.59E-35	-0.526289549	0.656	0.979	2.09E-30			Rplp2	2.13E-38	0.270093886	1	1	4.65E-34		S100a9	4.63E-58	0.3938261	0.685	0.027	1.01E-53
Uqcrc1	1.44E-34	0.409936262	0.957	0.975	3.14E-30		Tex101	0.000139084	0.829777869	1	0.973	1			Rnaset2a	4.96E-111	0.629584506	0.941	0.846	1.08E-106		Rpl10	5.03E-34	0.516304416	1	1	1.10E-29			Prdx1	2.78E-38	0.515993828	0.993	1	6.07E-34		Marcksl1	2.62E-15	0.393211578	0.955	0.957	5.71E-11
Khdrbs3	2.52E-34	-0.260204814	0.16	0.679	5.50E-30		Rps19	0.000139084	0.48081335	1	1	1			Rbbp4	1.48E-110	-0.444137445	0.781	0.919	3.23E-106		Mrps21	7.02E-34	0.511685698	0.994	0.977	1.53E-29			Hbb-bt	6.74E-38	0.818366927	0.742	0.301	1.47E-33		Atp5j2	6.49E-32	0.392403972	1	1	1.42E-27
mt-Cytb	2.47E-33	-0.419015764	0.994	0.984	5.39E-29		Ndufa3	0.000139084	0.438174115	1	0.973	1			Cct8	3.47E-110	-0.340993933	0.983	0.997	7.56E-106		Romo1	1.46E-33	0.575033871	1	0.979	3.18E-29			Cop1	9.90E-38	-0.465134805	0.656	0.897	2.16E-33		Lsm5	9.65E-29	0.390820949	1	0.997	2.11E-24
mt-Atp6	3.09E-33	-0.396527665	0.997	0.994	6.74E-29		Rpl28	0.000139084	-0.436604352	1	1	1			Cyhr1	4.37E-109	-0.418486343	0.302	0.683	9.55E-105		Anapc13	1.86E-33	0.578335196	0.968	0.986	4.05E-29			Med28	2.04E-36	0.414822846	0.993	0.972	4.45E-32		Skp1a	9.08E-13	0.390380102	1	1	1.98E-08
Rpl41	3.46E-33	0.356948804	0.997	1	7.54E-29		Cryl1	0.00014428	0.309762122	0.643	0.162	1			Tmem147	3.50E-108	0.394311849	0.964	0.93	7.63E-104		Fxr1	2.06E-33	-0.433090877	0.942	0.991	4.49E-29			Hspa4	4.04E-36	-0.450377509	0.92	0.984	8.82E-32		Sap18	1.66E-28	0.389946267	1	0.989	3.62E-24
Taf15	5.83E-33	-0.386437089	0.509	0.921	1.27E-28		Bloc1s6	0.000145273	0.355468329	1	0.757	1			Rps27l	8.67E-108	0.299131686	0.999	0.998	1.89E-103		Cox6c	2.42E-33	0.413844523	1	1	5.28E-29			mt-Nd2	4.92E-36	-1.177907855	0.906	0.959	1.07E-31		Nlrp5	7.29E-05	0.384253425	0.73	0.614	1
Hsp90ab1	1.29E-32	-0.336563104	1	1	2.80E-28		Kcmf1	0.000150404	-0.558237683	0.643	1	1			Med28	2.82E-105	0.377175225	0.984	0.952	6.15E-101		Brd1	2.73E-33	-0.373594696	0.37	0.853	5.96E-29			Npm3	1.62E-35	0.326808289	0.993	0.994	3.53E-31		Mael	1.36E-14	0.384186322	0.973	0.959	2.96E-10
Hspd1	2.25E-32	-0.303433998	1	1	4.91E-28		Manf	0.000150925	0.425322802	1	0.892	1			Fxr1	1.77E-103	-0.420674911	0.87	0.953	3.86E-99		Gm11808	3.18E-33	0.541608147	0.948	0.925	6.95E-29			Cyhr1	1.78E-35	-0.389483896	0.334	0.762	3.89E-31		Ranbp1	1.52E-25	0.383914589	0.982	0.997	3.31E-21
Pcm1	1.13E-31	-0.417782901	0.926	0.991	2.47E-27		Rpl37a	0.000151447	0.325640236	1	1	1			Rpl27	6.48E-103	0.317673552	1	0.997	1.41E-98		Cop1	3.24E-33	-0.439965668	0.513	0.904	7.08E-29			mt-Nd6	4.06E-35	-0.322582957	0.124	0.608	8.86E-31		Ppp4c	1.97E-21	0.380311371	0.928	0.897	4.30E-17
Ankrd11	2.12E-31	-0.458769163	0.734	0.95	4.62E-27		Rps20	0.000151447	-0.614400442	1	1	1			Rpl37a	9.84E-103	0.258064526	1	1	2.15E-98		Cox14	5.94E-33	0.558798962	0.987	0.993	1.30E-28			Ube2q1	4.46E-35	-0.424743837	0.525	0.865	9.73E-31		Padi6	0.003703045	0.376026834	0.991	0.992	1
Hspa4	3.69E-31	-0.410441854	0.937	0.997	8.04E-27		Stra8	0.000167884	0.94608275	0.357	0	1			Samd1	2.87E-102	-0.373200741	0.142	0.532	6.27E-98		Rpl36al	9.89E-33	0.449666653	1	0.998	2.16E-28			Rpl7a	4.64E-35	-0.283190072	0.997	0.997	1.01E-30		Bud31	1.58E-25	0.375204978	0.991	0.959	3.46E-21
4930447C04Rik	1.15E-30	-0.459665805	0.991	1	2.50E-26		Mageb18	0.000167884	0.321211319	0.357	0	1			mt-Nd6	3.35E-101	-0.337687964	0.082	0.46	7.32E-97		Dnajc2	1.76E-32	-0.370893358	0.974	1	3.84E-28			Prc1	7.71E-35	-0.472231534	0.873	0.966	1.68E-30		Rps27l	1.62E-32	0.373175734	1	1	3.54E-28
Crebzf	2.20E-30	-0.274589928	0.257	0.78	4.81E-26		Car2	0.000167884	0.298402287	0.357	0	1			Rcc2	1.15E-100	-0.457988579	0.419	0.757	2.52E-96		Mta1	1.92E-32	-0.450206878	0.558	0.923	4.20E-28			Pcm1	1.23E-34	-0.481140725	0.829	0.937	2.69E-30		Uqcrq	1.41E-26	0.368847927	1	1	3.08E-22
Spa17	2.39E-30	-0.38786983	0.749	0.956	5.21E-26		Ngp	0.000167884	0.259419289	0.357	0	1			Rnf17	4.20E-99	-0.4497433	0.805	0.926	9.18E-95		Car2	4.63E-32	0.273039467	0.325	0.007	1.01E-27			Rpl27	1.39E-33	0.298533051	0.997	1	3.03E-29		Ndufa1	2.42E-21	0.368127053	1	1	5.28E-17
S100a8	2.83E-30	0.316889601	0.36	0.009	6.18E-26		Magea10	0.000169252	0.410969176	0.571	0.108	1			Slk	4.80E-99	-0.491588274	0.458	0.74	1.05E-94		Hnrnpd	9.49E-32	-0.497929838	0.669	0.977	2.07E-27			Anapc13	4.47E-33	0.462793496	0.973	0.934	9.75E-29		Tma7	1.70E-25	0.367391761	1	0.997	3.70E-21
Oaz2	2.98E-30	0.439502154	0.886	0.833	6.51E-26		Ppp1r8	0.000176717	0.36879918	0.857	0.351	1			Rpl36	7.13E-99	0.299089894	1	0.997	1.56E-94		Rcc2	1.76E-31	-0.441373368	0.526	0.921	3.85E-27			Gm11808	8.60E-33	0.448614445	0.92	0.868	1.88E-28		Nop10	1.81E-15	0.366282171	0.973	0.97	3.95E-11
Stmn1	3.49E-30	0.493543549	0.991	0.972	7.62E-26		Eif1b	0.000179339	-0.43235441	1	1	1			Cox4i1	1.24E-97	0.263241812	1	0.999	2.71E-93		Ppp2r5c	8.60E-31	-0.417996913	0.545	0.932	1.88E-26			Rpl39	1.92E-32	-0.381655005	0.99	1	4.19E-28		Macrod1	6.11E-13	0.365782721	0.901	0.88	1.33E-08
Kpna2	3.95E-30	0.467729888	0.911	0.874	8.62E-26		Dnajc2	0.000179339	-0.476582394	1	1	1			Ube2d3	6.21E-97	0.32266844	0.997	0.996	1.36E-92		Rpl12	8.79E-31	-0.357450939	1	1	1.92E-26			Rps5	3.24E-32	0.29937302	1	1	7.07E-28		Arpp19	1.31E-21	0.363536398	0.991	0.992	2.86E-17
Qk	6.25E-30	-0.382393395	0.711	0.934	1.36E-25		mt-Co1	0.000179339	-0.535026786	1	1	1			Hnrnpd	7.24E-96	-0.474785285	0.626	0.867	1.58E-91		Ranbp9	1.24E-30	-0.371955457	0.416	0.848	2.70E-26			Adh5	3.33E-32	-0.337893916	0.886	0.953	7.26E-28		Mea1	1.50E-27	0.362162625	1	1	3.27E-23
Atp5l	6.27E-30	0.321582125	0.989	0.987	1.37E-25		Dnajc21	0.000179339	-0.641435226	0.929	1	1			R3hdm2	9.86E-95	-0.441222293	0.718	0.904	2.15E-90		Ppp4c	2.06E-30	0.470019457	0.955	0.923	4.50E-26			Lsm5	5.22E-32	0.377705169	0.993	0.991	1.14E-27		Cops9	4.27E-23	0.362071524	1	0.997	9.31E-19
Tmem147	8.91E-30	0.371593538	0.986	0.975	1.94E-25		Asf1b	0.000184497	0.414303046	1	0.73	1			Rpl28	2.00E-94	-0.292515207	0.995	1	4.37E-90		Mpp6	3.09E-30	-0.448810626	0.779	0.981	6.73E-26			Taf10	7.95E-32	-0.443889473	0.893	0.994	1.74E-27		Eif3g	1.90E-23	0.360333577	0.991	1	4.15E-19
Nop53	9.79E-30	0.397112877	0.897	0.843	2.14E-25		Fmr1	0.000195033	0.608199987	1	1	1			S100a9	6.11E-94	0.272582383	0.303	0.009	1.33E-89		Ranbp1	6.28E-30	0.408146583	1	0.998	1.37E-25			Cul4b	8.82E-32	-0.408270781	0.676	0.915	1.92E-27		Nutf2	1.13E-18	0.356045526	0.784	0.628	2.47E-14
Arf6	1.17E-29	0.433893999	0.837	0.774	2.56E-25		1700020N01Rik	0.000202212	0.489680446	0.5	0.054	1			Tlk1	1.58E-92	-0.458577383	0.548	0.801	3.45E-88		Rack1	7.42E-30	-0.357517251	0.994	1	1.62E-25			Wtip	8.88E-32	-0.282402921	0.181	0.649	1.94E-27		Rsl24d1	3.81E-19	0.355284903	0.955	0.959	8.32E-15
Ptges3	2.17E-29	-0.360400249	0.929	0.981	4.73E-25		Mbnl3	0.000202212	0.306631369	0.5	0.054	1			Taf10	2.03E-92	-0.39908776	0.862	0.984	4.43E-88		Ap2s1	1.28E-29	0.41941207	0.974	0.96	2.79E-25			Ppp2r5c	9.77E-32	-0.385518463	0.532	0.843	2.13E-27		E330017A01Rik	0.14360593	0.355240028	0.865	0.875	1
Rps26	5.71E-29	-0.311032407	0.997	1	1.25E-24		Eid2	0.000208872	-0.42144973	0	0.622	1			Pcm1	2.65E-91	-0.460933421	0.778	0.923	5.78E-87		Rnaset2b	2.26E-29	0.659511446	0.961	0.97	4.94E-25			Marcksl1	1.50E-31	0.571699766	0.936	0.884	3.27E-27		Cd164l2	8.86E-18	0.353999886	1	1	1.93E-13
Rps27rt	7.28E-29	0.398723925	0.931	0.918	1.59E-24		Grcc10	0.000218753	0.707766802	0.786	0.405	1			Ftl1	1.15E-88	0.463305683	0.995	0.992	2.51E-84		mt-Cytb	3.00E-29	-0.549703653	0.994	1	6.56E-25			Copb2	2.12E-31	-0.353354111	0.943	0.987	4.62E-27		Tmsb4x	6.28E-18	0.353789875	0.919	0.878	1.37E-13
Chic2	1.30E-28	0.291035012	0.994	0.997	2.83E-24		Blvrb	0.000227102	0.334680016	0.429	0.027	1			Dnajc2	1.89E-88	-0.340170261	0.944	0.986	4.13E-84		Dnaja2	4.91E-29	-0.351633551	0.968	1	1.07E-24			Slk	2.73E-31	-0.453017255	0.455	0.79	5.97E-27		Hmgn2	3.40E-14	0.351685707	0.964	0.973	7.43E-10
Lamtor5	2.13E-28	0.318220549	0.991	0.987	4.65E-24		Rps3a1	0.000230369	-0.394505853	1	1	1			Uqcrc1	3.40E-88	0.354474682	0.957	0.917	7.42E-84		Hmga1b	4.99E-29	0.455281814	0.766	0.425	1.09E-24			Ptges3	6.02E-31	-0.331916387	0.96	0.991	1.31E-26		Gpx4	6.12E-14	0.35151018	0.991	0.997	1.33E-09
Pdia3	2.61E-28	-0.372219305	0.871	0.959	5.70E-24		Rpl38	0.000230369	-0.4627867	1	1	1			Larp1b	3.78E-88	-0.430434471	0.756	0.932	8.26E-84		Rps18	5.44E-29	0.323590729	1	1	1.19E-24			mt-Nd3	7.10E-31	-0.832543615	0.766	0.846	1.55E-26		Pmf1	7.67E-20	0.35103297	0.946	0.916	1.67E-15
Tmsb4x	5.84E-28	0.373577526	0.806	0.616	1.27E-23		Eef1b2	0.000230369	-0.518669071	1	1	1			Cop1	1.15E-87	-0.414869939	0.512	0.768	2.52E-83		Hspa4	2.22E-28	-0.418966403	0.89	0.998	4.84E-24			Rnf17	8.65E-31	-0.441074415	0.816	0.966	1.89E-26		Elob	1.65E-28	0.350231898	1	1	3.59E-24
Rplp0	6.55E-28	0.337866319	1	1	1.43E-23		Usp5	0.000251828	0.294085787	0.714	0.243	1			Srsf9	1.08E-85	-0.39845339	0.8	0.957	2.35E-81		Rps27l	2.78E-28	0.401180467	1	1	6.07E-24			Cox4i1	1.03E-30	0.253435126	1	1	2.24E-26		Ndufb4	3.54E-20	0.349805517	1	0.997	7.72E-16
Spire1	6.84E-28	-0.315966733	0.417	0.843	1.49E-23		Clca3b	0.000259486	0.316702529	0.5	0.054	1			Dnaja2	1.11E-85	-0.333546686	0.939	0.983	2.42E-81		Qk	3.85E-28	-0.417879125	0.571	0.871	8.40E-24			Prrc2c	1.13E-30	-0.432741565	0.9	0.975	2.47E-26		Tuba1b	4.08E-15	0.349322849	1	0.984	8.90E-11
U2surp	8.30E-28	-0.318981311	0.92	0.987	1.81E-23		4930524B15Rik	0.000283385	0.865436419	0.714	0.297	1			Rpl39	3.14E-85	-0.366324156	0.994	1	6.84E-81		Rpl30	5.09E-28	-0.522957503	0.994	0.998	1.11E-23			mt-Nd4l	2.02E-30	-0.729020956	0.672	0.815	4.42E-26		Sec61g	2.65E-18	0.348732134	1	1	5.78E-14
Sf3b4	8.56E-28	0.408956341	0.854	0.821	1.87E-23		Qk	0.000291544	-0.554042037	0.571	1	1			Snrpg	3.76E-82	0.352634474	0.998	0.988	8.20E-78		Copb2	5.12E-28	-0.399950659	0.942	0.991	1.12E-23			Rps27rt	6.36E-30	0.502687657	0.913	0.812	1.39E-25		Ubl7	4.25E-20	0.34743152	0.901	0.878	9.27E-16
Ckap5	1.27E-27	-0.359449331	0.854	0.969	2.77E-23		Figla	0.000294703	-0.886326592	0.857	1	1			Rad21l	7.26E-82	-0.353452857	0.211	0.571	1.59E-77		Alyref	5.55E-28	-0.440370118	0.864	1	1.21E-23			Nsa2	7.77E-30	-0.417216476	0.826	0.94	1.70E-25		Zfand6	6.07E-19	0.347283726	0.982	0.984	1.33E-14
Nsa2	1.27E-27	-0.40542449	0.734	0.956	2.78E-23		Rps17	0.000294796	0.450025243	1	1	1			Rps26	8.79E-82	-0.327281012	1	1	1.92E-77		Dnajc21	5.56E-28	-0.4132686	0.922	0.998	1.21E-23			Ddx6	8.19E-30	-0.432715351	0.729	0.906	1.79E-25		Slirp	2.33E-17	0.346363582	0.964	0.927	5.09E-13
Ubr5	1.55E-27	-0.385804181	0.814	0.969	3.39E-23		Minos1	0.000294796	0.406152914	1	1	1			Mprip	3.57E-80	-0.383770876	0.579	0.811	7.78E-76		Nutf2	6.55E-28	0.448765975	0.799	0.565	1.43E-23			Rbbp4	8.29E-30	-0.362433382	0.849	0.947	1.81E-25		Rpp21	4.05E-21	0.344258565	1	0.997	8.84E-17
Rplp2	1.60E-27	0.259645283	1	1	3.50E-23		Rpl18	0.000319783	-0.413774559	1	1	1			Ubr5	1.18E-77	-0.426612201	0.615	0.841	2.58E-73		Tnrc6c	8.21E-28	-0.384127966	0.403	0.855	1.79E-23			Cct8	1.25E-29	-0.315123733	0.997	0.994	2.72E-25		Atp5k	2.05E-11	0.343833461	1	0.995	4.47E-07
Map4k4	1.85E-27	-0.383409362	0.683	0.912	4.05E-23		Rps12	0.000319783	-0.491408857	1	1	1			Hnrnpk	2.57E-77	0.376897919	0.987	0.962	5.60E-73		Rock1	9.49E-28	-0.53407713	0.838	0.986	2.07E-23			Drap1	1.40E-29	-0.398080433	0.93	0.987	3.04E-25		Eif4a2	6.58E-13	0.343309598	0.964	0.951	1.44E-08
Ube2s	3.60E-27	0.321336033	1	1	7.85E-23		Ssbp1	0.000319783	-0.617905061	1	1	1			H3f3a	2.62E-76	-0.333961376	0.969	0.995	5.72E-72		Eif3m	2.54E-27	-0.351230406	0.955	0.998	5.55E-23			Ndufa2	1.42E-29	0.339174062	0.993	0.984	3.10E-25		Rps18	4.96E-32	0.341822187	1	1	1.08E-27
Ube2d3	3.95E-27	0.304743434	0.997	1	8.62E-23		Yod1	0.000319921	0.732594094	0.857	0.432	1			Ckap5	4.31E-76	-0.43065718	0.669	0.859	9.40E-72		Crls1	3.57E-27	-0.282560336	0.253	0.785	7.80E-23			Csnk1a1	1.57E-29	-0.334812547	0.92	0.987	3.43E-25		Ftl1	1.37E-18	0.338192303	1	1	3.00E-14
Psmb6	6.75E-27	0.320850736	0.989	0.987	1.47E-22		H2bfm	0.00032494	0.373089404	0.786	0.27	1			Ubn1	9.49E-75	-0.391190374	0.794	0.939	2.07E-70		Eef1a1	3.65E-27	-0.39191541	1	1	7.98E-23			Wdr36	2.19E-29	-0.369373819	0.936	0.978	4.79E-25		Usp50	4.54E-15	0.337879334	0.802	0.644	9.92E-11
Fxr1	1.10E-26	-0.313964994	0.937	0.987	2.39E-22		Tesmin	0.000329833	0.673326859	0.571	0.108	1			Marcksl1	1.94E-74	0.482661481	0.917	0.822	4.23E-70		Lsm7	5.46E-27	0.420216398	0.994	0.986	1.19E-22			Snrpg	2.33E-29	0.350286736	1	0.991	5.09E-25		Zfp787	2.69E-15	0.337698517	0.946	0.927	5.86E-11
R3hdm2	2.14E-26	-0.337287373	0.794	0.965	4.66E-22		Tex19.2	0.00034232	0.454269679	0.786	0.324	1			Khdrbs3	9.22E-74	-0.282755239	0.149	0.479	2.01E-69		Oaz2	1.09E-26	0.502285944	0.831	0.785	2.39E-22			mt-Co2	2.77E-29	-0.962781367	0.977	1	6.04E-25		Gm15446	2.24E-52	0.337419653	0.64	0.027	4.89E-48
Cep350	2.53E-26	-0.266234888	0.266	0.736	5.52E-22		Copb2	0.000346742	-0.460339003	0.929	1	1			Rnaset2b	7.31E-73	0.535131242	0.863	0.725	1.59E-68		Cct8	1.33E-26	-0.327777626	1	1	2.90E-22			Atp5l	4.83E-29	0.334022302	1	0.991	1.05E-24		Minos1	2.43E-20	0.336577052	0.991	0.997	5.30E-16
Atxn2	4.75E-26	-0.300665558	0.42	0.858	1.04E-21		Fam46d	0.000358075	0.34332312	0.571	0.135	1			Kpna2	3.94E-71	0.379035438	0.881	0.817	8.60E-67		Mycbp	1.38E-26	0.441684182	1	0.998	3.02E-22			Bptf	5.05E-29	-0.44969978	0.562	0.834	1.10E-24		Ndufs5	8.80E-27	0.335191163	0.991	1	1.92E-22
Cep290	5.06E-26	-0.376306541	0.814	0.975	1.10E-21		Hdac1	0.000362188	0.507393861	1	0.757	1			Drap1	5.66E-71	-0.384908847	0.875	0.971	1.24E-66		mt-Nd5	1.60E-26	-0.510394853	0.831	0.974	3.50E-22			Qk	6.08E-29	-0.42810559	0.562	0.846	1.33E-24		Rabac1	2.05E-15	0.330366121	0.991	0.997	4.48E-11
Rbmxl2	5.31E-26	-0.357529811	0.726	0.943	1.16E-21		Tram1	0.0003713	0.495450226	0.857	0.649	1			Taf5	1.96E-70	-0.362859874	0.803	0.945	4.28E-66		Cebpb	2.04E-26	-0.395405793	0.214	0.692	4.45E-22			Tlk1	1.06E-28	-0.384657992	0.622	0.875	2.32E-24		Atox1	3.54E-20	0.328782238	0.982	0.995	7.72E-16
Axin1	6.38E-26	-0.266509158	0.346	0.83	1.39E-21		Rps27	0.000375815	0.503953743	1	1	1			Axin1	3.76E-70	-0.347730872	0.375	0.66	8.21E-66		Ccdc71l	2.14E-26	-0.296017664	0.37	0.825	4.66E-22			Psmb6	2.06E-28	0.302602391	0.993	0.984	4.50E-24		Cox4i2	0.001009827	0.328357444	0.955	0.967	1
Atad2	6.56E-26	-0.359292691	0.854	0.972	1.43E-21		Bri3	0.000375815	-0.717376327	0.929	1	1			Gclm	6.49E-70	-0.280663386	0.955	0.992	1.42E-65		Kpna2	2.68E-26	0.51780084	0.903	0.939	5.84E-22			Rpl30	2.41E-28	-0.380599292	0.993	0.994	5.27E-24		Gstp2	5.52E-10	0.325907045	0.532	0.304	1.20E-05
Cyhr1	6.79E-26	-0.263821017	0.329	0.799	1.48E-21		Ccnb3	0.000425702	0.609426964	0.786	0.27	1			Cox14	1.13E-69	0.330340913	0.956	0.913	2.46E-65		Ankrd40	4.12E-26	-0.278857178	0.299	0.794	8.99E-22			Rsrp1	2.59E-28	-0.363395419	0.388	0.743	5.66E-24		4933434E20Rik	4.22E-12	0.325684114	0.847	0.823	9.21E-08
Oaz1	7.11E-26	0.256411264	0.997	0.997	1.55E-21		Hist2h2aa1	0.000436886	0.277998722	0.5	0.081	1			Psmb6	2.41E-69	0.298602061	0.984	0.965	5.25E-65		Psmd6	4.12E-26	-0.33922942	0.955	0.998	9.00E-22			Uqcrc1	2.78E-28	0.344152251	0.967	0.978	6.07E-24		Ndufa7	2.13E-27	0.325364983	1	1	4.64E-23
Mrc1	1.03E-25	0.255106622	0.323	0.016	2.25E-21		Pdrg1	0.000437267	0.419949169	0.857	0.595	1			Ssr4	3.35E-68	0.323729884	0.961	0.923	7.31E-64		Pfn1	4.70E-26	0.481441748	0.994	0.988	1.03E-21			Pcbp2	4.25E-28	0.355852216	0.98	0.959	9.29E-24		Ndufa13	5.11E-22	0.325257521	1	0.997	1.12E-17
Adrm1	2.87E-25	0.391858712	0.94	0.934	6.26E-21		Fmr1nb	0.000440394	0.651121312	1	0.919	1			Cenpv	3.35E-68	-0.378910456	0.666	0.893	7.31E-64		Nop10	5.09E-26	0.527808792	0.981	0.981	1.11E-21			Eef1g	5.92E-28	0.301346416	0.99	0.997	1.29E-23		Spint2	6.86E-14	0.324652562	0.928	0.94	1.50E-09
Arfgef1	2.99E-25	-0.344579147	0.726	0.953	6.53E-21		Vps25	0.000444107	0.346667535	0.643	0.162	1			Ppp2r5c	3.88E-68	-0.341045951	0.35	0.649	8.47E-64		Elob	7.36E-26	0.316311478	1	1	1.61E-21			Gatad2a	1.12E-27	-0.37570181	0.786	0.925	2.46E-23		Ubl5	8.94E-22	0.321213575	0.991	0.997	1.95E-17
Rpl22l1	3.78E-25	0.346699579	0.997	0.997	8.25E-21		Dcaf13	0.000474469	-0.519482217	0.714	0.973	1			Arfgef1	6.52E-68	-0.37989237	0.63	0.824	1.42E-63		Esd	7.45E-26	-0.382390181	0.89	0.993	1.63E-21			Ccdc18	1.69E-27	-0.258739074	0.167	0.592	3.69E-23		Vkorc1	2.39E-17	0.316949719	1	0.995	5.22E-13
Gmps	4.02E-25	-0.309029768	0.88	0.978	8.78E-21		Ppm1d	0.000483362	0.334215485	0.857	0.405	1			Atp5l	6.77E-68	0.300012264	0.992	0.983	1.48E-63		Ndufa1	9.67E-26	0.426723924	1	1	2.11E-21			Tmsb4x	2.26E-27	0.421774977	0.816	0.574	4.93E-23		Tceal9	2.48E-07	0.315470121	0.874	0.899	0.005418182
Cct8	4.48E-25	-0.290250029	0.989	0.997	9.77E-21		Rab21	0.000528793	-0.554892999	0.429	0.838	1			Nop53	1.96E-66	0.391484234	0.801	0.651	4.28E-62		Acadl	1.50E-25	-0.409733111	0.623	0.923	3.28E-21			Srsf9	2.26E-27	-0.376840962	0.829	0.987	4.94E-23		Tmem243	3.28E-13	0.315216415	0.874	0.913	7.16E-09
Eif4a2	6.96E-25	0.395612679	0.991	0.994	1.52E-20		Mrpl38	0.000558403	0.340694531	1	0.946	1			mt-Nd2	9.54E-66	-0.950307458	0.922	0.911	2.08E-61		Kctd6	1.55E-25	-0.275982615	0.37	0.811	3.39E-21			Ddx23	3.09E-27	-0.363831049	0.482	0.812	6.74E-23		Ndufc1	9.62E-17	0.31462218	1	1	2.10E-12
Lsm5	7.86E-25	0.307919884	0.986	0.991	1.71E-20		Arf4	0.000558565	0.482819775	1	0.973	1			Lgmn	3.54E-65	0.335488287	0.518	0.248	7.73E-61		Rpl36	2.08E-25	0.36089556	1	1	4.54E-21			Htatsf1	3.29E-27	-0.353040771	0.876	0.962	7.18E-23		Son	3.98E-13	0.313393393	0.982	0.932	8.68E-09
Myl12a	1.73E-24	0.375990052	0.943	0.925	3.76E-20		Calm1	0.000558565	0.456532717	1	1	1			Anapc13	1.02E-64	0.374651424	0.922	0.822	2.22E-60		Usmg5	2.61E-25	0.482931645	1	0.998	5.71E-21			Dnajc2	4.38E-27	-0.314366308	0.973	0.978	9.56E-23		Dynlrb1	1.54E-21	0.312339831	1	1	3.36E-17
9-Mar	1.75E-24	-0.293562893	0.343	0.789	3.81E-20		Ccar1	0.000558565	-0.434166478	0.929	1	1			mt-Nd4l	1.82E-64	-0.724374236	0.682	0.731	3.97E-60		Uqcrq	3.93E-25	0.393486711	1	1	8.57E-21			Dnaja2	4.99E-27	-0.28971313	0.98	0.991	1.09E-22		Tomm7	5.08E-15	0.312194368	0.964	0.976	1.11E-10
Eef2	3.13E-24	0.252374231	1	1	6.84E-20		Ccng2	0.000561985	0.326286056	0.571	0.162	1			Tma7	2.26E-63	0.375467045	0.935	0.849	4.94E-59		Ndufs5	4.57E-25	0.29658129	1	1	9.97E-21			Uqcr11	6.67E-27	0.324452139	0.997	0.991	1.46E-22		Ap3s1	1.01E-19	0.310998433	0.973	0.986	2.20E-15
Rpl39	4.00E-24	-0.292102269	1	1	8.73E-20		Polr2l	0.000572322	0.630293787	0.857	0.676	1			mt-Nd3	2.54E-63	-0.730424552	0.769	0.769	5.53E-59		Eif3g	4.72E-25	0.348805634	1	1	1.03E-20			Osbp	6.95E-27	-0.262254195	0.217	0.621	1.52E-22		Bzw2	3.03E-09	0.309571068	0.847	0.834	6.62E-05
Npm3	7.25E-24	0.331756278	0.997	0.981	1.58E-19		Rcn2	0.000572322	0.516893679	0.857	0.676	1			Npm3	2.89E-63	0.266679399	0.984	0.974	6.31E-59		Ube2d3	5.77E-25	0.335000658	1	1	1.26E-20			Smad4	7.63E-27	-0.348489412	0.488	0.781	1.66E-22		Hba-a2	2.12E-39	0.308635646	0.856	0.312	4.64E-35
Larp4	1.24E-23	-0.332152058	0.683	0.959	2.71E-19		Spag7	0.000574036	0.393766157	0.929	0.405	1			Qk	2.99E-63	-0.36692204	0.552	0.754	6.53E-59		Mael	8.97E-25	0.582593726	0.955	0.967	1.96E-20			Zbtb10	8.55E-27	-0.398300371	0.532	0.834	1.87E-22		Tmem147	4.50E-20	0.30697945	0.982	0.981	9.81E-16
Dhx9	1.31E-23	-0.357962111	0.606	0.928	2.86E-19		Baiap2	0.000577601	0.370895016	0.786	0.351	1			Rps27rt	6.42E-63	0.379769462	0.889	0.786	1.40E-58		Btf3	1.61E-24	-0.274587514	1	1	3.52E-20			Txnip	9.30E-27	-0.572819083	0.639	0.865	2.03E-22		Mycbp	1.59E-13	0.306118688	0.973	0.984	3.47E-09
Rpsa	1.44E-23	-0.443527553	1	1	3.13E-19		H2afx	0.000602149	0.553008756	1	0.892	1			9-Mar	6.92E-63	-0.307954991	0.287	0.578	1.51E-58		Smchd1	1.83E-24	-0.399955207	0.773	0.951	4.00E-20			S100a9	1.34E-26	0.251242332	0.341	0.019	2.93E-22		Hbb-bs	5.89E-48	0.302420937	0.991	0.81	1.29E-43
Fkbp1a	2.73E-23	0.342790018	0.971	0.962	5.95E-19		Parl	0.000603874	-0.543796872	0.929	1	1			Nasp	1.94E-62	-0.33471551	0.861	0.939	4.24E-58		Ryk	2.23E-24	-0.272226484	0.305	0.773	4.88E-20			Rpl38	1.43E-26	-0.276306733	1	1	3.13E-22		Ube2d3	1.66E-17	0.302221374	1	1	3.63E-13
Cenpf	2.88E-23	-0.333390932	0.969	0.987	6.29E-19		Nexn	0.000605545	-0.583192529	0.286	0.73	1			Uqcrq	1.03E-61	0.318214665	0.98	0.97	2.24E-57		Cyhr1	2.26E-24	-0.298787132	0.429	0.836	4.94E-20			Nmd3	1.49E-26	-0.347415374	0.789	0.937	3.26E-22		Gm33301	7.87E-13	0.30045968	0.631	0.399	1.72E-08
Prdx1	3.19E-23	0.345492145	1	1	6.96E-19		Pmf1	0.000641245	0.649491655	0.857	0.541	1			Zfp91	1.08E-61	-0.353918138	0.764	0.897	2.36E-57		Slk	2.95E-24	-0.380885466	0.5	0.841	6.43E-20			Ckap5	1.64E-26	-0.370973453	0.595	0.868	3.58E-22		Ptp4a1	3.50E-11	0.299738927	0.901	0.872	7.63E-07
Sap30l	3.58E-23	-0.320526901	0.677	0.94	7.81E-19		Mprip	0.000647334	-0.441675456	0.643	0.865	1			Map4k4	1.52E-61	-0.386181585	0.59	0.78	3.31E-57		Naca	3.46E-24	-0.26729711	1	1	7.56E-20			Nop53	1.94E-26	0.409185629	0.893	0.828	4.22E-22		Tra2b	2.43E-11	0.299105756	0.847	0.764	5.30E-07
Rnaset2a	3.58E-23	0.423503596	0.791	0.698	7.81E-19		Ckb	0.00065013	-1.233041438	0.429	0.892	1			Kmt5a	2.07E-61	-0.35389803	0.451	0.688	4.52E-57		Bola2	5.39E-24	0.432722393	0.981	0.984	1.18E-19			Arf5	3.24E-26	0.335251279	1	0.975	7.06E-22		Mrpl33	1.03E-13	0.298229607	0.991	0.989	2.25E-09
Rif1	3.58E-23	-0.345076756	0.96	0.969	7.82E-19		Rnps1	0.000651848	0.383800152	1	0.919	1			Spint2	2.97E-61	0.339212003	0.926	0.899	6.47E-57		Ap2m1	5.52E-24	0.382267406	0.974	0.97	1.21E-19			Hnrnpf	4.18E-26	-0.301680396	0.977	0.997	9.11E-22		Ndufa5	1.34E-12	0.296862121	1	0.997	2.93E-08
Tnrc6c	5.40E-23	-0.298001332	0.554	0.899	1.18E-18		Tmem147	0.000652585	0.536489379	1	0.973	1			Pak1ip1	9.25E-61	-0.356081069	0.873	0.959	2.02E-56		Sppl3	7.11E-24	-0.259777113	0.305	0.773	1.55E-19			Taf5	4.35E-26	-0.399303172	0.833	0.969	9.48E-22		Gemin7	1.46E-15	0.296731301	0.892	0.932	3.19E-11
Rps5	5.69E-23	0.280380339	1	1	1.24E-18		Kpna2	0.000693959	0.560742655	0.929	0.838	1			Mrps21	3.03E-60	0.365377958	0.93	0.862	6.62E-56		Hnrnpf	8.77E-24	-0.317697026	0.994	1	1.91E-19			Dhx36	4.45E-26	-0.38113693	0.696	0.903	9.71E-22		Atp5j	5.25E-16	0.296503099	0.991	1	1.15E-11
Sec61g	9.23E-23	0.294344377	0.994	0.991	2.01E-18		Rbm38	0.000694179	0.455964047	0.929	0.514	1			Mpp6	3.56E-60	-0.3310218	0.754	0.892	7.77E-56		Npm3	9.73E-24	0.391728395	0.994	0.988	2.12E-19			Cox14	4.74E-26	0.328193816	0.977	0.981	1.03E-21		Ap2m1	3.44E-14	0.296356994	0.955	0.986	7.50E-10
Tlk1	9.87E-23	-0.336545869	0.654	0.915	2.15E-18		Ube2e1	0.00070493	0.44612763	1	1	1			Ndufa2	4.11E-60	0.287137361	0.989	0.972	8.97E-56		Myl12a	1.91E-23	0.411362841	0.981	0.977	4.17E-19			Mprip	4.93E-26	-0.40043864	0.602	0.84	1.08E-21		Gadd45gip1	1.14E-18	0.295020459	0.982	0.989	2.48E-14
Rb1cc1	1.14E-22	-0.343784173	0.823	0.943	2.49E-18		Gpr89	0.000729844	0.361997073	0.857	0.568	1			Ndufa3	6.53E-60	0.357980207	0.942	0.843	1.42E-55		Mrpl52	2.80E-23	0.479271958	0.974	0.96	6.10E-19			Spdl1	5.47E-26	-0.317733619	0.375	0.737	1.19E-21		Get4	1.30E-15	0.290734041	0.874	0.891	2.84E-11
Ndufs7	1.63E-22	0.256614734	0.991	0.991	3.55E-18		Tex30	0.000761154	0.439318512	1	1	1			Dhx9	6.82E-60	-0.359443756	0.58	0.772	1.49E-55		Lsm5	3.57E-23	0.409556284	1	0.998	7.78E-19			Fkbp1a	9.06E-26	0.35019857	0.98	0.962	1.98E-21		Sod1	1.53E-16	0.289419499	0.991	0.997	3.34E-12
Uqcr10	1.76E-22	0.328998513	0.957	0.953	3.83E-18		Calm3	0.000762752	0.401962948	0.929	0.595	1			Rbmxl2	8.80E-60	-0.367899854	0.498	0.735	1.92E-55		Rps21	3.95E-23	-0.295658008	1	1	8.63E-19			Nlrp5	9.74E-26	-0.626227665	0.391	0.774	2.13E-21		Rps29	3.87E-19	0.289327483	1	1	8.44E-15
Ube2d2a	1.77E-22	0.332895231	0.966	0.972	3.87E-18		Cox7b2	0.000789271	0.685613908	0.857	0.568	1			Tex264	1.07E-59	0.343901359	0.852	0.781	2.33E-55		Ppp1r14b	4.00E-23	-0.267444729	0.26	0.741	8.72E-19			Ndufs5	1.01E-25	0.273831047	1	0.994	2.20E-21		Hsbp1	1.97E-16	0.288682863	1	0.997	4.29E-12
Polr2a	1.94E-22	-0.342821381	0.86	0.956	4.24E-18		Fam91a1	0.000802145	-0.413258428	0.429	0.865	1			Cul4b	2.04E-59	-0.328856216	0.664	0.825	4.45E-55		Rpl5	5.78E-23	-0.254191783	1	1	1.26E-18			Mta1	1.06E-25	-0.35242422	0.582	0.828	2.32E-21		2810004N23Rik	2.32E-11	0.288360618	0.946	0.951	5.07E-07
Snrpg	3.04E-22	0.259428959	0.997	0.991	6.63E-18		Hbb-bt	0.000810683	-0.724185549	0.714	0.216	1			Ranbp9	4.34E-59	-0.300138533	0.379	0.65	9.47E-55		Nmd3	6.66E-23	-0.417226782	0.864	0.986	1.45E-18			Psmd6	1.08E-25	-0.317221202	0.943	0.972	2.36E-21		Myl12a	7.19E-12	0.287136344	0.964	0.989	1.57E-07
Ubn1	3.04E-22	-0.330528706	0.92	0.984	6.63E-18		Prps1	0.000812712	0.436586763	0.929	0.649	1			Atxn2	4.92E-59	-0.297420179	0.279	0.552	1.07E-54		Csnk1a1	8.00E-23	-0.321227839	0.929	0.993	1.74E-18			Ppp1r14b	1.10E-25	-0.271442014	0.291	0.693	2.40E-21		Rbm8a	6.05E-12	0.28591485	1	0.995	1.32E-07
Bptf	3.78E-22	-0.33645427	0.809	0.956	8.25E-18		Pias2	0.000821295	0.363536059	1	0.946	1			Dld	7.65E-59	-0.294166175	0.841	0.939	1.67E-54		Ndufv3	9.19E-23	0.428953022	0.974	0.988	2.01E-18			Kif4	1.27E-25	-0.393448374	0.803	0.947	2.77E-21		Brk1	4.50E-15	0.285702916	0.964	0.965	9.82E-11
Trpm7	6.47E-22	-0.320146004	0.711	0.934	1.41E-17		Gm42418	0.000821295	-0.495594125	0.857	1	1			Nsa2	8.82E-59	-0.380785491	0.69	0.844	1.93E-54		Txnl1	1.07E-22	-0.323326986	0.955	0.995	2.34E-18			Eif3m	1.47E-25	-0.336928573	0.906	0.975	3.20E-21		Rab11a	1.49E-16	0.285571145	0.991	0.997	3.25E-12
Mdn1	6.73E-22	-0.323566894	0.743	0.95	1.47E-17		Eef1d	0.000821519	-0.377102344	1	1	1			Ccdc73	1.30E-58	-0.399175339	0.934	0.974	2.84E-54		Tlk1	2.36E-22	-0.342943703	0.604	0.869	5.16E-18			Ubr5	1.68E-25	-0.380358658	0.635	0.875	3.66E-21		Cox7a2	8.80E-22	0.284390108	1	1	1.92E-17
Pcbp2	8.13E-22	0.273959258	0.997	0.987	1.77E-17		Rps2	0.000821519	-0.503986142	1	1	1			Crls1	6.22E-58	-0.311058183	0.363	0.636	1.36E-53		Tmem147	2.63E-22	0.390666325	0.987	0.988	5.75E-18			Tdrd1	2.38E-25	-0.377726783	0.853	0.95	5.20E-21		Polr2i	1.83E-18	0.282224041	0.991	0.995	4.00E-14
Crebrf	1.31E-21	-0.291294074	0.491	0.855	2.85E-17		Jag2	0.000824476	-0.457915006	0.286	0.811	1			Ankrd40	9.20E-58	-0.310626224	0.41	0.662	2.01E-53		Arpp19	2.96E-22	0.353327307	1	0.995	6.47E-18			Rad50	2.43E-25	-0.375690078	0.91	0.969	5.30E-21		Dppa5a	0.000160192	0.282142797	0.955	0.986	1
Cop1	1.88E-21	-0.291855602	0.58	0.903	4.10E-17		Bloc1s1	0.000847448	0.655680089	0.857	0.784	1			mt-Co2	2.52E-57	-0.86759077	0.971	0.969	5.50E-53		Vdac2	3.41E-22	-0.304602181	0.942	1	7.44E-18			Smchd1	2.58E-25	-0.396464443	0.766	0.944	5.62E-21		Cox5b	1.18E-23	0.281560153	1	1	2.58E-19
Dnajc2	1.88E-21	-0.29062259	0.963	1	4.11E-17		H2-Ab1	0.000876579	0.317337633	0.286	0	1			Bola2	2.71E-57	0.332045699	0.926	0.875	5.92E-53		Adh5	4.40E-22	-0.325747457	0.877	0.988	9.61E-18			Myl12a	2.75E-25	0.343514648	0.97	0.944	6.00E-21		Ndufb6	1.15E-14	0.281087427	1	1	2.52E-10
Usp7	3.03E-21	-0.317643542	0.58	0.893	6.61E-17		Lgals1	0.000886076	0.354543095	0.714	0.216	1			Arf5	1.47E-56	0.269657305	0.97	0.943	3.21E-52		Ndufc1	5.79E-22	0.427132652	1	0.998	1.26E-17			Anapc11	2.88E-25	0.365144204	0.98	0.934	6.30E-21		Pfdn6	4.19E-16	0.279455524	1	0.992	9.14E-12
Ube2e1	4.54E-21	0.332701438	0.937	0.947	9.91E-17		Deaf1	0.000896485	0.282203952	0.571	0.135	1			Mrpl55	5.40E-56	0.2649706	0.937	0.911	1.18E-51		Serf2	9.03E-22	0.293033064	1	1	1.97E-17			Nexn	4.21E-25	-0.422697846	0.833	0.969	9.18E-21		Cstb	1.45E-08	0.278810734	0.856	0.826	0.000315604
Sap18	5.04E-21	0.290905221	0.983	0.991	1.10E-16		Syap1	0.000934552	0.484837193	0.857	0.838	1			Sf3b4	8.32E-56	0.328011754	0.803	0.705	1.82E-51		Snrpf	9.53E-22	0.349973699	1	1	2.08E-17			1700018B24Rik	5.39E-25	0.376109461	0.94	0.915	1.18E-20		Cox16	9.58E-12	0.277896025	0.811	0.696	2.09E-07
Arf5	7.52E-21	0.315562695	0.971	0.962	1.64E-16		Ttc1	0.000949647	0.485998953	0.929	0.757	1			Mea1	1.56E-55	0.293668826	0.938	0.896	3.39E-51		Kctd2	1.16E-21	-0.252176943	0.312	0.778	2.53E-17			Nasp	5.41E-25	-0.358068037	0.92	0.953	1.18E-20		Ndufa11	8.64E-15	0.277673235	1	1	1.88E-10
Bloc1s1	7.83E-21	0.358299724	0.86	0.849	1.71E-16		Ddx27	0.000950704	-0.457711791	0.714	0.973	1			Tra2b	1.86E-55	0.333781595	0.854	0.743	4.06E-51		Rpl22	1.16E-21	-0.268595418	1	1	2.54E-17			Spint2	6.81E-25	0.368377891	0.94	0.915	1.49E-20		Tsga10ip	1.54E-05	0.277655075	0.865	0.864	0.336455988
Pnn	9.06E-21	-0.309704628	0.817	0.95	1.98E-16		Fkbp1a	0.00095579	0.403763769	1	0.973	1			Lamtor5	2.72E-55	0.259315899	0.975	0.957	5.93E-51		Dynlrb1	1.22E-21	0.368624213	0.994	0.988	2.66E-17			Tnrc6c	9.17E-25	-0.35232408	0.572	0.846	2.00E-20		Wdr89	2.46E-10	0.276688322	0.928	0.918	5.37E-06
Tomm20	9.75E-21	0.252140825	0.994	1	2.13E-16		Rps14	0.00095579	0.297915671	1	1	1			Afdn	3.79E-55	-0.345325283	0.738	0.882	8.27E-51		Psma2	1.39E-21	-0.284308372	0.987	1	3.04E-17			Ranbp9	1.01E-24	-0.341751654	0.468	0.781	2.21E-20		1010001B22Rik	6.53E-52	0.276291038	0.55	0	1.42E-47
Cyc1	1.19E-20	0.313994677	0.986	0.984	2.59E-16		Trpm7	0.000970475	-0.422263017	0.643	0.919	1			Adh5	5.18E-55	-0.307409336	0.766	0.91	1.13E-50		Tma7	1.56E-21	0.431810981	0.974	0.991	3.40E-17			Morf4l1	1.05E-24	0.351182078	0.993	0.991	2.29E-20		Btf3l4	8.66E-12	0.275177791	0.919	0.927	1.89E-07
Naxe	1.59E-20	0.283000193	0.98	0.987	3.47E-16		Ankrd11	0.001015178	-0.621319294	0.714	0.919	1			Actr10	6.40E-55	-0.300537305	0.718	0.863	1.40E-50		0610010K14Rik	2.23E-21	0.387809242	0.935	0.939	4.86E-17			H1fx	1.42E-24	-0.423486705	0.639	0.884	3.09E-20		Npm3	5.45E-12	0.275154148	1	0.984	1.19E-07
Iws1	1.68E-20	-0.288384497	0.649	0.931	3.67E-16		Lrr1	0.001017495	0.366521056	0.786	0.378	1			Fkbp1a	1.52E-54	0.274546395	0.967	0.939	3.31E-50		Polr2a	2.33E-21	-0.354695346	0.597	0.867	5.09E-17			Enho	2.03E-24	-0.275530966	0.298	0.718	4.42E-20		Per3	4.84E-05	0.274863363	0.739	0.78	1
Gemin5	1.97E-20	-0.263904986	0.474	0.858	4.30E-16		Enah	0.001024	-0.561839511	0.643	0.865	1			Wapl	2.14E-54	-0.334876456	0.726	0.89	4.66E-50		Rps15	2.36E-21	0.290224434	1	1	5.14E-17			Ppp3cb	3.24E-24	-0.355074875	0.709	0.903	7.06E-20		Lgals1	2.86E-14	0.272138086	0.73	0.465	6.25E-10
Mlf2	2.34E-20	0.307332452	0.931	0.921	5.12E-16		Lman2	0.001029564	0.363974953	0.857	0.73	1			Bud31	3.30E-54	0.31696569	0.89	0.814	7.21E-50		Ndufa6	2.98E-21	0.379899133	0.994	1	6.51E-17			Dmwd	4.38E-24	-0.255780725	0.274	0.677	9.57E-20		Map1lc3a	7.55E-14	0.270630528	0.982	0.976	1.65E-09
Spint2	2.43E-20	0.353495721	0.969	0.965	5.29E-16		Spcs1	0.001030297	0.600236702	1	0.973	1			Vdac2	5.33E-54	-0.267324854	0.929	0.968	1.16E-49		Rsl24d1	5.73E-21	0.385291715	0.948	0.977	1.25E-16			Ddx10	4.63E-24	-0.32187122	0.88	0.962	1.01E-19		Hnrnpl	1.16E-10	0.27017458	0.91	0.829	2.54E-06
Cdc42bpa	2.88E-20	-0.26901277	0.463	0.849	6.29E-16		Eef1g	0.001030297	0.499921091	1	1	1			Smc1b	5.81E-54	-0.252138298	1	0.999	1.27E-49		Atp5j2	6.15E-21	0.323626212	1	1	1.34E-16			Uqcr10	4.65E-24	0.359663006	0.973	0.969	1.02E-19		Tmem258	3.67E-15	0.269948285	1	1	8.00E-11
Uqcrq	4.58E-20	0.308545525	0.974	0.981	9.99E-16		Aldoa	0.001034466	0.535397902	0.929	0.541	1			Lrrc42	2.51E-53	-0.287437134	0.83	0.93	5.47E-49		Gm10076	8.20E-21	0.405051093	0.935	0.944	1.79E-16			Sppl3	4.67E-24	-0.26649631	0.331	0.702	1.02E-19		Med27	2.46E-06	0.269415383	0.919	0.981	0.053736476
Eif3a	5.34E-20	-0.270300113	0.977	0.987	1.17E-15		Ndufa12	0.001069254	0.379654978	0.929	0.973	1			Eif3m	3.33E-53	-0.290364524	0.877	0.957	7.27E-49		Map4k4	8.87E-21	-0.370744066	0.669	0.883	1.94E-16			Nop10	5.19E-24	0.3745458	0.967	0.937	1.13E-19		Ndufs6	1.03E-16	0.26933432	1	1	2.24E-12
Cox6b1	6.59E-20	0.281430533	0.986	0.981	1.44E-15		App	0.001090692	0.287157789	0.571	0.135	1			Luc7l3	8.69E-53	-0.341436496	0.732	0.863	1.90E-48		Bptf	1.02E-20	-0.381521911	0.61	0.867	2.23E-16			Map4k4	5.57E-24	-0.403731592	0.615	0.853	1.22E-19		Xdh	3.57E-08	0.268995203	1	0.997	0.000778401
Taf1d	7.04E-20	-0.287808946	0.837	0.95	1.54E-15		G3bp2	0.001104382	-0.625200666	0.786	0.946	1			Txnl1	4.92E-52	-0.261542743	0.901	0.953	1.07E-47		Fkbp1a	1.06E-20	0.332083694	0.981	0.993	2.31E-16			Hnrnpk	6.67E-24	0.346603575	0.997	0.984	1.46E-19		Atpif1	1.01E-08	0.268541103	0.982	0.995	0.000220044
Ubl5	1.19E-19	0.285479243	0.963	0.978	2.60E-15		Pabpc1	0.001110149	0.476542171	1	0.973	1			Myl12a	5.16E-52	0.290738243	0.93	0.909	1.13E-47		Marcksl1	1.06E-20	0.551515848	0.929	0.932	2.32E-16			Lgals1	8.72E-24	0.316030692	0.498	0.169	1.90E-19		Timm10b	3.18E-14	0.268143871	0.973	0.981	6.93E-10
Kmt5a	1.24E-19	-0.275594435	0.58	0.918	2.71E-15		Coro1c	0.001155516	0.352366898	0.857	0.486	1			Psmd6	5.84E-52	-0.275501162	0.907	0.961	1.28E-47		AI314180	1.45E-20	-0.323700752	0.552	0.855	3.17E-16			Kpna2	1.43E-23	0.358129871	0.936	0.906	3.12E-19		Tpgs1	1.23E-10	0.266919256	0.847	0.905	2.68E-06
Phb	2.04E-19	0.330013624	0.823	0.811	4.46E-15		Hmox2	0.00115918	0.386963453	1	0.757	1			Raly	5.92E-52	0.268933485	0.949	0.933	1.29E-47		Sf3b1	1.65E-20	-0.339661515	0.89	0.991	3.59E-16			Hadha	1.57E-23	-0.311055485	0.806	0.922	3.43E-19		Gps2	3.29E-12	0.266881275	0.919	0.938	7.17E-08
Nufip2	2.21E-19	-0.26748767	0.52	0.884	4.83E-15		Nabp1	0.001178409	0.507877348	0.786	0.541	1			Ppp4r2	6.06E-52	-0.323336766	0.776	0.916	1.32E-47		H1fx	1.72E-20	-0.406855252	0.474	0.864	3.76E-16			Zfand6	1.61E-23	0.362736036	0.946	0.906	3.51E-19		mt-Nd1	4.04E-05	0.266875107	0.991	0.995	0.881473101
Ndufs3	2.45E-19	0.267513339	0.963	0.969	5.35E-15		Pdcd6ip	0.001178559	-0.391168132	0.786	0.892	1			Glrx3	9.99E-52	-0.26109758	0.914	0.965	2.18E-47		Tomm6	1.77E-20	0.408100543	0.87	0.864	3.85E-16			Mpp6	1.79E-23	-0.356564276	0.789	0.94	3.91E-19		Tram1	1.27E-12	0.265379928	0.883	0.832	2.77E-08
Dmrtc2	5.80E-19	0.476697586	0.791	0.752	1.26E-14		D10Wsu102e	0.001194461	-1.00168808	0.929	0.946	1			Ptpn2	1.34E-51	-0.314689768	0.603	0.79	2.92E-47		Rock2	1.98E-20	-0.344594745	0.597	0.893	4.32E-16			Sap30l	3.17E-23	-0.330097097	0.585	0.884	6.93E-19		Rpl36a	2.15E-10	0.265010194	1	1	4.68E-06
H1fx	6.77E-19	-0.47532544	0.891	0.975	1.48E-14		Ubn1	0.001195382	-0.596485758	0.857	1	1			Bclaf3	3.05E-51	-0.32366279	0.548	0.738	6.66E-47		Rps29	2.07E-20	0.308038724	1	1	4.51E-16			Ndufa3	3.70E-23	0.397887031	0.973	0.947	8.07E-19		Rnf167	1.12E-10	0.264613074	0.91	0.908	2.44E-06
Ssr4	8.06E-19	0.319288776	0.98	0.984	1.76E-14		Rpl10	0.00119569	0.499406771	1	1	1			Eif3a	3.11E-51	-0.316422028	0.864	0.956	6.79E-47		Raly	2.10E-20	0.336355078	0.968	0.988	4.59E-16			Ppp2ca	4.09E-23	-0.351007959	0.776	0.947	8.92E-19		Snrnp25	1.61E-13	0.26383886	0.892	0.897	3.51E-09
Tex264	8.67E-19	0.353864088	0.909	0.909	1.89E-14		Cops9	0.00119569	0.371186027	1	1	1			Ap2m1	4.41E-51	0.286912928	0.9	0.836	9.62E-47		Eif3a	2.19E-20	-0.38872762	0.825	0.984	4.77E-16			Bloc1s1	4.10E-23	0.361518833	0.873	0.815	8.94E-19		Cmc2	3.63E-16	0.261866485	0.946	0.957	7.93E-12
Mprip	9.61E-19	-0.257665153	0.68	0.921	2.10E-14		Prr19	0.001204507	0.310765127	0.929	0.541	1			Uqcr11	6.09E-51	0.253132773	0.992	0.989	1.33E-46		Ppp2ca	2.29E-20	-0.323358529	0.74	0.979	5.01E-16			Dhx9	4.65E-23	-0.386027091	0.719	0.89	1.01E-18		Sdhb	3.80E-14	0.261751046	1	0.997	8.29E-10
Siah1b	1.06E-18	0.348607053	0.943	0.921	2.30E-14		Ide	0.001213972	0.364063345	0.714	0.324	1			Larp4	6.96E-51	-0.326614322	0.612	0.774	1.52E-46		Rad50	2.34E-20	-0.379789168	0.883	0.993	5.10E-16			Spire1	7.14E-23	-0.305835732	0.485	0.793	1.56E-18		Tle6	6.57E-10	0.261598643	1	0.995	1.43E-05
Larp7	1.07E-18	-0.277183794	0.903	0.994	2.34E-14		Btg1	0.001224251	0.520550944	0.857	0.514	1			Ergic3	8.83E-51	0.283057873	0.914	0.873	1.93E-46		Sfr1	2.55E-20	-0.321348524	1	1	5.57E-16			Rest	8.26E-23	-0.398304544	0.789	0.931	1.80E-18		Wtap	0.004232047	0.261404037	0.766	0.856	1
Nae1	1.15E-18	-0.261223732	0.966	0.987	2.50E-14		Hells	0.00124039	0.572707841	1	1	1			Dhx36	1.86E-50	-0.3480107	0.685	0.837	4.06E-46		Cox5b	3.14E-20	0.270455706	1	1	6.85E-16			Ankrd40	9.04E-23	-0.304227987	0.465	0.771	1.97E-18		Elp5	2.18E-11	0.260852582	0.937	0.94	4.77E-07
D8Ertd738e	1.28E-18	0.280051624	0.971	0.975	2.80E-14		Fmc1	0.00124226	0.427576528	0.714	0.405	1			Slc25a39	1.91E-50	-0.291423816	0.546	0.753	4.17E-46		Rps2	3.65E-20	-0.293666209	1	1	7.96E-16			Dnttip2	1.45E-22	-0.298204127	0.943	0.972	3.16E-18		Lamtor5	1.53E-12	0.259836038	0.964	0.992	3.33E-08
Naa38	1.31E-18	0.330776446	0.883	0.899	2.85E-14		Bhlhe41	0.001270301	-0.601591191	0	0.514	1			Hadha	2.04E-50	-0.30992609	0.729	0.86	4.44E-46		Ubl5	3.70E-20	0.340390286	1	0.998	8.07E-16			Axin1	1.51E-22	-0.26473193	0.415	0.777	3.29E-18		Fkbp1a	6.51E-12	0.259082851	0.973	0.992	1.42E-07
Mrpl54	1.31E-18	0.298068614	0.957	0.947	2.87E-14		Crebbp	0.001284019	-0.451433433	0.857	0.946	1			Ppp2ca	2.41E-50	-0.314924206	0.747	0.897	5.26E-46		Dnaja1	4.19E-20	-0.319747618	0.948	0.991	9.13E-16			Trpm7	1.60E-22	-0.371006703	0.652	0.85	3.48E-18		Zp3	0.207723455	0.259017566	0.874	0.935	1
Prrc2c	2.30E-18	-0.357730778	0.971	0.994	5.02E-14		Ruvbl2	0.001288713	0.430837978	0.857	0.541	1			Prrc2c	2.44E-50	-0.327483935	0.886	0.955	5.33E-46		Morf4l2	4.65E-20	0.355147693	0.961	0.944	1.02E-15			Cdc42bpa	2.69E-22	-0.387249888	0.599	0.84	5.88E-18		Ngp	1.10E-43	0.256150757	0.468	0	2.39E-39
Gemin7	3.67E-18	0.299432605	0.883	0.918	8.00E-14		Slc25a5	0.001292385	0.346941269	0.786	0.378	1			Lgals1	3.49E-50	0.270916115	0.42	0.169	7.63E-46		mt-Co1	5.64E-20	-0.375594638	0.994	1	1.23E-15			Glrx3	2.72E-22	-0.290203674	0.923	0.978	5.95E-18		Raly	7.08E-12	0.255694114	0.973	0.973	1.55E-07
Tmx4	3.77E-18	-0.276069019	0.794	0.943	8.23E-14		Tcp11l2	0.001317156	0.478631026	0.714	0.324	1			Pak2	4.39E-50	-0.326828664	0.697	0.844	9.57E-46		Cox6b1	7.04E-20	0.364791664	1	1	1.54E-15			Med17	2.79E-22	-0.309552072	0.866	0.937	6.09E-18		Slc25a5	3.28E-08	0.251257086	0.955	0.967	0.000714779
Calr	4.19E-18	-0.279576285	0.997	0.981	9.14E-14		Tmed3	0.001365947	0.504384317	0.929	0.838	1			Elane	5.47E-50	0.2544346	0.157	0	1.19E-45		Hspd1	7.46E-20	-0.275796761	0.994	1	1.63E-15			Larp4	3.21E-22	-0.355054582	0.669	0.859	6.99E-18		Hmga1b	3.67E-12	0.250492201	0.649	0.457	8.01E-08
Tmsb10	4.55E-18	0.356306422	0.977	0.962	9.92E-14		Qrich1	0.001365947	0.465001649	1	0.811	1			Uba2	6.28E-50	-0.251940379	0.904	0.959	1.37E-45		Cox4i1	8.72E-20	0.25950653	1	1	1.90E-15			Rpl22l1	3.40E-22	0.300983797	0.993	0.994	7.42E-18		Ppp1cb	3.12E-08	0.250372319	0.793	0.728	0.000680593
Marcksl1	4.63E-18	0.531433716	0.92	0.862	1.01E-13		Slc35b2	0.001370368	0.487375042	0.643	0.243	1			Ppp3cb	1.02E-49	-0.315861919	0.597	0.791	2.22E-45		Cops9	1.16E-19	0.375502343	0.994	0.998	2.54E-15			Ppp4r2	3.80E-22	-0.351428808	0.759	0.947	8.28E-18		Auts2	8.24E-08	-0.250309708	0.712	0.878	0.001797885
Txnip	4.72E-18	-0.47124762	0.726	0.94	1.03E-13		Mlf1	0.001371842	0.649862492	0.929	0.486	1			Ubl7	1.57E-49	0.327038001	0.728	0.562	3.43E-45		Atox1	1.25E-19	0.364796635	0.994	0.995	2.73E-15			Eif3c	4.02E-22	-0.253148579	0.983	0.987	8.77E-18		Csrp2	2.57E-09	-0.250897482	0.721	0.91	5.62E-05
Ubl7	5.20E-18	0.347967521	0.754	0.72	1.14E-13		Gstm1	0.001384603	0.279943542	0.643	0.162	1			Prdx1	5.27E-49	0.328199994	1	0.998	1.15E-44		Uqcrc2	1.28E-19	-0.290972701	0.922	0.998	2.79E-15			Lsm4	4.33E-22	0.265368903	0.983	0.984	9.46E-18		Rbbp4	1.85E-14	-0.251294812	0.883	0.981	4.05E-10
Mrpl55	6.00E-18	0.309507244	0.946	0.956	1.31E-13		Eif3g	0.001385319	0.447983579	1	1	1			Rad50	5.74E-49	-0.323419821	0.844	0.924	1.25E-44		Ndufb6	1.37E-19	0.306480561	1	1	3.00E-15			Lsm14b	5.12E-22	-0.354919957	0.896	0.997	1.12E-17		Rb1cc1	8.14E-12	-0.251464449	0.658	0.834	1.78E-07
Lgmn	6.08E-18	0.32209552	0.569	0.381	1.33E-13		Taf13	0.001392342	0.473651457	1	0.595	1			Spire1	1.89E-48	-0.301899553	0.45	0.669	4.12E-44		Ftl1	1.80E-19	0.447987534	1	0.998	3.93E-15			Sf3b1	6.76E-22	-0.303700226	0.903	0.975	1.48E-17		Aimp1	5.95E-16	-0.251877704	0.964	0.997	1.30E-11
Zcchc7	6.29E-18	-0.276238466	0.549	0.855	1.37E-13		Stk33	0.00140356	0.270919824	0.643	0.189	1			Eif4enif1	1.92E-48	-0.31661124	0.617	0.771	4.19E-44		Npm1	1.92E-19	-0.25552741	1	1	4.18E-15			Mea1	7.58E-22	0.299759927	0.973	0.95	1.65E-17		Bod1l	4.62E-10	-0.252567153	0.658	0.859	1.01E-05
Rcc2	7.01E-18	-0.276751051	0.42	0.792	1.53E-13		Zfp72	0.001455869	0.329173697	0.571	0.135	1			Minos1	2.30E-48	0.270547902	0.993	0.993	5.03E-44		Usp50	1.97E-19	0.424721526	0.799	0.612	4.29E-15			Atxn2	7.70E-22	-0.265739505	0.331	0.68	1.68E-17		Slc25a3	1.11E-13	-0.252677903	0.973	1	2.43E-09
Mea1	7.20E-18	0.294142726	0.92	0.956	1.57E-13		Gas6	0.001455869	0.269765068	0.571	0.135	1			Cox6b1	7.40E-48	0.27177525	0.976	0.952	1.62E-43		Gtf2b	2.46E-19	-0.364900571	0.682	0.93	5.36E-15			Tax1bp1	9.22E-22	-0.289977398	0.916	0.959	2.01E-17		Trap1a	8.05E-09	-0.252747015	0.568	0.802	0.000175697
Ube2m	1.33E-17	-0.301814992	0.809	0.947	2.91E-13		Tbc1d10a	0.001468197	0.277850007	0.571	0.162	1			Snrnp200	1.49E-47	-0.321080184	0.641	0.808	3.25E-43		Unc13c	4.50E-19	-0.41483103	0.429	0.822	9.82E-15			Arfgef1	1.01E-21	-0.348510893	0.659	0.875	2.21E-17		Rpl9	7.14E-17	-0.254012113	1	1	1.56E-12
Hspa5	1.86E-17	-0.303211144	0.997	0.987	4.05E-13		Ankhd1	0.001475275	0.474933361	0.786	0.405	1			Ier3ip1	1.83E-47	0.333058405	0.864	0.762	3.99E-43		Ubr5	5.21E-19	-0.321488941	0.578	0.886	1.14E-14			Tubb4b	1.11E-21	-0.28626899	0.997	1	2.42E-17		Ankrd12	1.81E-06	-0.254620465	0.757	0.848	0.039407762
Rpl36al	2.02E-17	0.266214293	0.983	0.987	4.40E-13		Rps28	0.001490198	0.406287366	1	1	1			Anapc11	3.62E-47	0.283903296	0.933	0.89	7.90E-43		Larp4	7.22E-19	-0.33036656	0.649	0.881	1.58E-14			Mphosph10	1.15E-21	-0.288992381	0.813	0.922	2.51E-17		Dnttip2	2.16E-14	-0.256185391	0.955	0.986	4.72E-10
Eif3f	2.48E-17	0.290167624	0.969	0.969	5.42E-13		Rps18	0.001490198	0.260717327	1	1	1			Dctpp1	6.43E-47	0.266629691	0.968	0.929	1.40E-42		Uchl3	7.93E-19	-0.295333951	0.955	1	1.73E-14			Uqcrq	1.77E-21	0.309095973	0.993	0.997	3.86E-17		Tmem259	3.01E-19	-0.256292617	0.495	0.875	6.56E-15
Bola2	3.29E-17	0.274866328	0.937	0.95	7.19E-13		Tnrc6c	0.001492711	-0.423949624	0.429	0.892	1			Slirp	7.50E-47	0.295632008	0.887	0.801	1.64E-42		Tmem258	9.17E-19	0.328248706	1	0.998	2.00E-14			2810474O19Rik	1.78E-21	-0.405514276	0.679	0.875	3.89E-17		Sar1b	2.71E-10	-0.256993617	0.775	0.973	5.91E-06
Cul4b	3.98E-17	-0.301543016	0.817	0.978	8.69E-13		Ddit4	0.001495086	0.573897781	0.714	0.27	1			Zbtb10	1.76E-46	-0.324871673	0.473	0.673	3.85E-42		Txnip	1.04E-18	-0.449563653	0.643	0.928	2.28E-14			Ndufb6	1.99E-21	0.29536906	0.997	0.984	4.33E-17		Ruvbl1	4.77E-16	-0.2575456	0.739	0.957	1.04E-11
Snrnp200	4.05E-17	-0.298567832	0.714	0.928	8.83E-13		Gm33301	0.001495086	0.427376265	0.714	0.27	1			Hnrnpf	3.22E-46	-0.253096517	0.947	0.982	7.03E-42		Cul4b	1.15E-18	-0.289957364	0.747	0.956	2.50E-14			Lrrc42	2.75E-21	-0.341341434	0.816	0.944	6.01E-17		Dnajc2	1.23E-18	-0.258220008	1	0.997	2.68E-14
Srsf9	6.07E-17	-0.255021374	0.869	0.972	1.32E-12		Hnrnpm	0.001499117	0.52341921	0.929	0.622	1			Usp16	3.45E-46	-0.329622883	0.755	0.857	7.53E-42		Ubxn1	1.20E-18	-0.28750706	0.922	0.998	2.62E-14			Eif3a	3.99E-21	-0.373235032	0.893	0.966	8.70E-17		Kdm1a	2.41E-14	-0.258834414	0.613	0.891	5.25E-10
Mrps24	6.89E-17	0.253908101	0.989	0.991	1.50E-12		Rnf5	0.001499117	0.334065304	0.929	0.622	1			Rsrp1	3.48E-46	-0.294557624	0.398	0.618	7.60E-42		Hectd1	1.37E-18	-0.349103261	0.734	0.956	2.99E-14			Cox6b1	4.87E-21	0.323948678	0.987	0.978	1.06E-16		Mdn1	1.70E-10	-0.258866293	0.604	0.821	3.71E-06
Ranbp2	7.85E-17	-0.283654144	0.623	0.896	1.71E-12		Ube2d2a	0.001544956	0.434668456	1	1	1			Spata5	3.60E-46	-0.262156997	0.88	0.953	7.86E-42		Axin1	1.67E-18	-0.251843861	0.383	0.764	3.63E-14			Lamtor5	6.48E-21	0.267929857	0.96	0.978	1.41E-16		Kif3a	1.27E-12	-0.259278668	0.865	0.959	2.78E-08
Sdhb	1.13E-16	0.253935561	0.954	0.991	2.46E-12		Rack1	0.001602349	-0.402676295	1	1	1			Bloc1s1	9.38E-46	0.318644324	0.825	0.735	2.05E-41		Prdx1	1.67E-18	0.611310558	1	1	3.64E-14			Pten	7.66E-21	-0.331018784	0.615	0.868	1.67E-16		Cenpf	3.64E-09	-0.261445414	0.901	0.976	7.95E-05
2510039O18Rik	1.30E-16	0.302977009	0.78	0.777	2.85E-12		H2afz	0.001722224	0.600429168	1	1	1			Psap	9.80E-46	0.316261954	0.652	0.46	2.14E-41		Hsp90b1	1.79E-18	-0.400028016	0.903	0.991	3.92E-14			Rars	1.18E-20	-0.283622762	0.779	0.934	2.57E-16		Btf3	1.24E-19	-0.261801452	1	1	2.72E-15
mt-Nd1	1.38E-16	0.301999467	1	0.991	3.02E-12		Ccdc122	0.00175183	0.447265169	0.857	0.595	1			Snrpb2	1.42E-45	0.323294999	0.935	0.875	3.10E-41		Bud31	2.01E-18	0.307581933	0.942	0.963	4.38E-14			Sumo1	1.28E-20	0.271349653	0.973	0.978	2.80E-16		Naca	5.43E-26	-0.262332393	1	1	1.19E-21
Rad50	1.40E-16	-0.26544496	0.929	0.984	3.06E-12		Crls1	0.00175183	-0.421077642	0.286	0.811	1			Atad2	1.95E-45	-0.333170744	0.637	0.794	4.26E-41		Nop53	2.15E-18	0.465961148	0.857	0.867	4.70E-14			Hspa8	1.71E-20	-0.341189018	0.997	1	3.73E-16		Cyhr1	2.57E-16	-0.262425362	0.532	0.883	5.61E-12
Adipor1	1.70E-16	0.278926464	0.809	0.796	3.71E-12		Hgsnat	0.00176798	0.264814569	0.643	0.243	1			Ube2r2	2.66E-45	-0.287109641	0.684	0.859	5.80E-41		Cds1	2.16E-18	-0.264215734	0.39	0.757	4.70E-14			Tma7	1.83E-20	0.373191073	0.98	0.962	3.99E-16		Mtx2	9.18E-15	-0.263058739	0.928	0.986	2.00E-10
Ndufa3	1.89E-16	0.319035509	0.911	0.918	4.12E-12		Brd1	0.001778028	-0.343291519	0.214	0.703	1			Nlrp5	2.74E-45	-0.344482704	0.145	0.397	5.99E-41		Ier3ip1	2.28E-18	0.447702031	0.909	0.918	4.98E-14			Zfp91	1.85E-20	-0.323127983	0.749	0.909	4.04E-16		Oxct1	1.95E-17	-0.263960181	0.396	0.812	4.25E-13
Wdr89	1.92E-16	0.284361312	0.863	0.906	4.20E-12		Eri3	0.001797026	0.35285597	0.786	0.432	1			Pnn	4.48E-45	-0.342891987	0.696	0.805	9.78E-41		Prpf8	2.71E-18	-0.292080505	0.578	0.897	5.91E-14			Snrnp200	2.40E-20	-0.375328954	0.666	0.868	5.24E-16		Ube2q1	5.13E-15	-0.265111254	0.649	0.908	1.12E-10
Hnrnpk	2.14E-16	0.291804132	0.986	0.981	4.67E-12		Rbmxl2	0.001797784	-0.49743601	0.714	0.865	1			Psmd12	4.95E-45	-0.254344237	0.827	0.924	1.08E-40		Actr10	2.98E-18	-0.306471504	0.747	0.977	6.51E-14			Macf1	2.85E-20	-0.419479847	0.676	0.887	6.23E-16		Ppp4r2	3.07E-13	-0.265686687	0.811	0.976	6.70E-09
Spcs1	2.67E-16	0.306098391	0.897	0.89	5.83E-12		Atp5l	0.001850298	0.33829165	1	1	1			Heca	6.03E-45	-0.264096674	0.328	0.563	1.32E-40		Med17	3.26E-18	-0.315581526	0.786	0.96	7.12E-14			Mrpl54	2.97E-20	0.291945415	0.98	0.962	6.48E-16		Cct5	1.48E-17	-0.26669438	0.982	0.995	3.24E-13
Erh	3.13E-16	0.262204455	0.971	0.994	6.83E-12		Bscl2	0.001932802	0.35929674	0.571	0.162	1			Naa38	1.47E-44	0.281820249	0.897	0.834	3.20E-40		Pten	3.62E-18	-0.31354377	0.636	0.921	7.90E-14			Actr10	3.20E-20	-0.284882223	0.783	0.918	6.99E-16		Mov10l1	3.54E-08	-0.266701178	0.838	0.927	0.000771783
Mtch2	3.50E-16	0.27930914	0.923	0.918	7.63E-12		Pdxp	0.001932802	0.29200262	0.571	0.162	1			Ankrd11	2.11E-44	-0.378219164	0.549	0.691	4.61E-40		Crebbp	4.17E-18	-0.375862918	0.721	0.907	9.10E-14			Ubn1	3.73E-20	-0.352375074	0.742	0.95	8.14E-16		Mphosph10	4.24E-12	-0.266953484	0.82	0.962	9.24E-08
Gcc2	3.55E-16	-0.267057963	0.689	0.915	7.75E-12		Tm2d2	0.001948459	0.322174906	0.857	0.622	1			Mrpl54	2.20E-44	0.26975838	0.938	0.902	4.80E-40		Rbmxl2	4.44E-18	-0.310186364	0.325	0.715	9.68E-14			Hist1h2ae	3.76E-20	-0.274968467	0.214	0.58	8.21E-16		Prrc2c	1.66E-09	-0.266979966	0.91	0.962	3.62E-05
Bclaf3	4.02E-16	-0.250162818	0.717	0.947	8.78E-12		Pigw	0.001955794	0.297785688	0.429	0.081	1			Arpp19	2.26E-44	0.282322678	0.928	0.893	4.94E-40		Asna1	4.63E-18	0.403767436	0.89	0.909	1.01E-13			Bola2	3.76E-20	0.3153026	0.963	0.966	8.21E-16		Clint1	1.43E-12	-0.267413543	0.793	0.951	3.11E-08
Smc1b	4.07E-16	-0.295663917	0.997	1	8.89E-12		Slc35a2	0.001958481	0.415235444	0.786	0.514	1			Mphosph10	2.50E-44	-0.281679927	0.747	0.857	5.45E-40		Gclm	5.85E-18	-0.291298362	0.974	0.998	1.28E-13			Snrpb2	4.16E-20	0.351976023	0.98	0.944	9.09E-16		Neb	2.30E-05	-0.267964381	0.757	0.91	0.50236614
Qrich1	4.32E-16	0.308951626	0.9	0.909	9.42E-12		Hspd1	0.00198707	-0.307667095	1	1	1			Lsm7	3.53E-44	0.276532418	0.978	0.952	7.71E-40		Pnrc1	8.48E-18	-0.369375065	0.877	0.995	1.85E-13			Ube2a	5.92E-20	0.28587943	0.967	0.947	1.29E-15		Ptges3	4.74E-14	-0.268204321	0.973	0.995	1.03E-09
Sptbn1	4.50E-16	-0.265331248	0.586	0.871	9.83E-12		Tomm6	0.002006041	0.388229693	0.929	0.622	1			Wdr36	4.22E-44	-0.300366136	0.881	0.934	9.21E-40		Nsmce4a	1.09E-17	-0.327038742	0.734	0.956	2.37E-13			Fam193a	8.84E-20	-0.322261597	0.452	0.73	1.93E-15		Ryk	7.28E-22	-0.268450215	0.369	0.799	1.59E-17
Hmgb1	4.58E-16	-0.260162187	0.989	1	1.00E-11		Meioc	0.002027875	0.717529101	0.714	0.297	1			Tdrd1	5.70E-44	-0.304553654	0.787	0.893	1.24E-39		Uqcrc1	1.16E-17	0.298303658	0.994	0.993	2.52E-13			Tmem259	1.00E-19	-0.262379024	0.428	0.771	2.19E-15		Fam92a	3.15E-11	-0.268766202	0.838	0.967	6.88E-07
Atmin	5.76E-16	0.285124116	0.651	0.547	1.26E-11		Zmat1	0.002040621	0.338906941	0.714	0.351	1			Kat2a	8.53E-44	0.302765131	0.669	0.508	1.86E-39		Rps27rt	1.84E-17	0.422476764	0.935	0.949	4.02E-13			H3f3a	1.07E-19	-0.262505953	0.983	1	2.34E-15		Vcp	1.88E-15	-0.268851259	0.973	0.992	4.10E-11
Wdr26	7.11E-16	-0.254053323	0.731	0.931	1.55E-11		Adtrp	0.002040974	0.290446958	0.429	0.054	1			Pten	9.55E-44	-0.275735745	0.568	0.778	2.08E-39		Ndufb2	1.93E-17	0.408996821	0.987	0.984	4.22E-13			Mrps21	1.07E-19	0.382263685	0.973	0.947	2.34E-15		Crebbp	7.75E-10	-0.269865862	0.82	0.932	1.69E-05
Hnrnpd	8.35E-16	-0.272335955	0.791	0.962	1.82E-11		Tob1	0.002066566	0.682086821	0.929	0.703	1			Vps41	1.22E-43	-0.262715812	0.726	0.858	2.66E-39		Gatad2a	2.14E-17	-0.298866914	0.747	0.937	4.68E-13			Ofd1	1.12E-19	-0.350939756	0.839	0.969	2.44E-15		Slk	1.99E-15	-0.270270476	0.468	0.777	4.34E-11
Nhp2	8.67E-16	0.274516167	0.906	0.896	1.89E-11		Snupn	0.002071623	0.306662367	0.714	0.27	1			Rpl22l1	2.86E-43	0.25653118	0.997	0.993	6.25E-39		Ddx23	2.50E-17	-0.274433805	0.481	0.829	5.46E-13			Myl12b	1.17E-19	-0.27550307	0.94	0.975	2.55E-15		Tex15	0.000198605	-0.270801766	0.973	0.965	1
Fam208b	1.14E-15	-0.261385348	0.66	0.906	2.48E-11		Mtch2	0.002115736	0.348037476	1	0.838	1			Tnrc6c	3.60E-43	-0.278392723	0.462	0.666	7.86E-39		Jak1	2.59E-17	-0.301644816	0.688	0.928	5.64E-13			Bclaf3	1.29E-19	-0.290884372	0.515	0.799	2.83E-15		Fip1l1	6.59E-14	-0.272290032	0.919	0.992	1.44E-09
Reg2	1.29E-15	0.371250389	0.671	0.55	2.81E-11		Por	0.002125971	0.417167441	0.714	0.324	1			Ublcp1	4.82E-43	-0.276589079	0.663	0.824	1.05E-38		Atp5j	2.59E-17	0.333958981	0.994	1	5.66E-13			Cox17	1.90E-19	0.328003599	0.99	0.981	4.15E-15		Zfp91	5.50E-13	-0.272655087	0.73	0.935	1.20E-08
Tulp4	1.56E-15	-0.254144396	0.877	0.959	3.40E-11		Gclm	0.002133065	-0.255356239	1	1	1			Ofd1	5.02E-43	-0.294843074	0.809	0.919	1.10E-38		Dicer1	2.82E-17	-0.310786044	0.89	0.991	6.15E-13			Znrd1as	1.94E-19	-0.271211117	0.682	0.906	4.23E-15		Med17	1.27E-14	-0.273967566	0.874	0.976	2.77E-10
Rsrp1	1.64E-15	-0.255123597	0.709	0.937	3.59E-11		Zcrb1	0.002133065	-0.462925624	0.929	1	1			Cd2ap	5.13E-43	-0.289071375	0.564	0.732	1.12E-38		G3bp2	3.54E-17	-0.30750092	0.987	0.995	7.74E-13			Fbxl14	2.17E-19	-0.250385836	0.401	0.74	4.73E-15		Adh5	1.54E-18	-0.274339525	0.937	0.995	3.35E-14
Polr2i	1.76E-15	0.264091857	0.954	0.937	3.83E-11		Epb41l5	0.002155277	0.4315046	0.857	0.649	1			Ift74	6.60E-43	-0.307010765	0.616	0.786	1.44E-38		Cdc42bpa	4.03E-17	-0.301946677	0.513	0.829	8.79E-13			Ankrd11	2.57E-19	-0.402401242	0.532	0.799	5.60E-15		Micu2	3.34E-15	-0.274482754	0.757	0.927	7.30E-11
Poldip2	1.85E-15	0.260071624	0.957	0.956	4.04E-11		Bckdha	0.002163863	0.462615866	0.929	0.514	1			Leo1	1.33E-42	-0.275195575	0.537	0.753	2.90E-38		Ube2q1	4.86E-17	-0.265504826	0.584	0.904	1.06E-12			Sf3b4	3.30E-19	0.327806354	0.856	0.79	7.21E-15		Ddx1	2.40E-15	-0.275221197	0.928	0.981	5.23E-11
Atp5g1	2.11E-15	0.271895816	0.986	0.969	4.61E-11		Ppp2r5a	0.002163863	-0.494479482	0.357	0.73	1			Fam241a	3.65E-42	-0.26880702	0.395	0.643	7.97E-38		Atrx	6.39E-17	-0.390442523	0.558	0.841	1.39E-12			1810022K09Rik	3.43E-19	-0.298966301	0.759	0.878	7.48E-15		Eif4a3	2.10E-16	-0.275499996	0.91	0.995	4.58E-12
Arid4b	2.33E-15	-0.252312855	0.863	0.959	5.08E-11		Usp26	0.002168503	0.627508377	0.857	0.405	1			Arcn1	4.27E-42	-0.272774431	0.63	0.799	9.32E-38		Smap1	6.44E-17	-0.255584597	0.981	1	1.40E-12			Zfp958	3.66E-19	-0.251438859	0.341	0.696	7.98E-15		Ube2c	9.33E-24	-0.276703977	1	1	2.04E-19
Macf1	2.65E-15	-0.25308208	0.637	0.868	5.79E-11		Purb	0.002175773	-0.389000023	0.357	0.757	1			Polr2l	4.78E-42	0.304405453	0.842	0.748	1.04E-37		Mea1	7.08E-17	0.2758219	0.981	0.993	1.54E-12			mt-Nd1	3.83E-19	0.522471362	0.99	0.95	8.36E-15		Gclm	2.01E-15	-0.277994934	0.964	1	4.38E-11
Ccdc88a	3.69E-15	-0.299679576	0.777	0.915	8.05E-11		Hnrnph2	0.002218915	0.47644381	0.929	0.703	1			Wdr26	7.34E-42	-0.287576835	0.579	0.749	1.60E-37		Slirp	7.08E-17	0.339366662	0.942	0.928	1.54E-12			Ppp1ca	3.88E-19	0.280433396	0.983	0.972	8.47E-15		Ltv1	3.03E-15	-0.279184529	0.82	0.97	6.62E-11
Ift74	4.12E-15	-0.255899831	0.757	0.943	9.00E-11		Wdfy1	0.002220901	-0.45733128	0.214	0.703	1			Xrn2	7.57E-42	-0.305930784	0.722	0.857	1.65E-37		Ankrd11	8.42E-17	-0.355774344	0.558	0.855	1.84E-12			Dld	4.52E-19	-0.286694512	0.823	0.931	9.87E-15		Ptpn2	2.79E-14	-0.279369912	0.775	0.965	6.09E-10
Bms1	4.25E-15	-0.253723815	0.694	0.928	9.29E-11		Atmin	0.002244606	0.387733473	0.643	0.297	1			Agfg1	1.08E-41	-0.274299231	0.554	0.752	2.36E-37		Eif4a3	8.60E-17	-0.271024689	0.903	0.991	1.88E-12			Mdc1	4.60E-19	-0.272097349	0.375	0.712	1.00E-14		Psmd12	2.01E-15	-0.279464043	0.901	0.978	4.38E-11
8030474K03Rik	6.83E-15	0.307681491	0.863	0.881	1.49E-10		Ppp4c	0.00224493	0.439567948	1	0.784	1			Akr1b3	1.15E-41	0.29264143	0.943	0.92	2.52E-37		Sp140	8.81E-17	-0.274157105	0.37	0.764	1.92E-12			AI314180	4.80E-19	-0.349239666	0.625	0.846	1.05E-14		Polr2a	1.29E-11	-0.279914251	0.613	0.804	2.81E-07
Ap3s1	9.75E-15	0.311718705	0.814	0.843	2.13E-10		Ubl7	0.00224986	0.320846941	0.857	0.622	1			Ddx23	1.20E-41	-0.261948114	0.441	0.653	2.62E-37		Atp5k	9.53E-17	0.400936735	1	0.995	2.08E-12			Cox6c	5.15E-19	0.257816656	1	1	1.12E-14		Eprs	2.34E-12	-0.281654751	0.946	0.995	5.10E-08
Emc7	1.32E-14	0.294948318	0.943	0.956	2.87E-10		Ubald2	0.002278093	0.273846402	0.5	0.135	1			Spa17	2.48E-41	-0.260915487	0.752	0.863	5.40E-37		Ddx6	1.32E-16	-0.311096056	0.831	0.974	2.88E-12			Sap18	5.39E-19	0.257790913	0.993	0.994	1.18E-14		Rock2	1.26E-13	-0.282468913	0.604	0.851	2.75E-09
Tfrc	1.45E-14	-0.273433195	0.663	0.874	3.16E-10		Eef1akmt4	0.002313823	0.256068271	0.571	0.162	1			Mcl1	2.65E-41	-0.285690065	0.507	0.697	5.77E-37		Arhgdia	1.76E-16	0.301961226	0.909	0.923	3.84E-12			Vta1	6.38E-19	-0.307634343	0.746	0.9	1.39E-14		Map4k4	5.70E-12	-0.282715184	0.676	0.832	1.24E-07
Ube2a	1.53E-14	0.302595955	0.963	0.956	3.35E-10		Rab24	0.002326066	0.349694139	1	0.486	1			Qrich1	3.82E-41	0.283612061	0.797	0.679	8.33E-37		7-Mar	1.77E-16	-0.344030018	0.675	0.918	3.86E-12			Nutf2	6.48E-19	0.367901454	0.712	0.564	1.41E-14		Rfc4	3.16E-17	-0.282844905	0.928	0.986	6.89E-13
Impdh2	2.07E-14	0.257493154	0.949	0.937	4.52E-10		1700080O16Rik	0.002326965	0.850273631	0.857	0.432	1			Pdia3	4.21E-41	-0.284180074	0.819	0.885	9.18E-37		Lrrc42	1.77E-16	-0.309637659	0.792	0.97	3.87E-12			Leo1	7.40E-19	-0.283437384	0.682	0.868	1.61E-14		Psma2	8.58E-21	-0.283609418	0.991	1	1.87E-16
Sf3a2	2.16E-14	0.306521257	0.711	0.708	4.72E-10		Dgat2	0.00232925	0.56225819	0.714	0.432	1			Uqcr10	7.48E-41	0.26095601	0.965	0.935	1.63E-36		Vta1	1.85E-16	-0.330872984	0.74	0.96	4.04E-12			Ap2s1	8.09E-19	0.275585889	0.936	0.947	1.76E-14		Yeats4	1.34E-12	-0.283658494	0.838	0.984	2.93E-08
Snapin	2.62E-14	0.27723429	0.869	0.877	5.71E-10		Pak1ip1	0.002365162	-0.678017979	0.786	0.973	1			Agpat5	1.13E-40	-0.270123587	0.73	0.869	2.46E-36		Rbm8a	1.97E-16	0.287771556	0.994	0.995	4.30E-12			Hmga1b	9.54E-19	0.349574145	0.753	0.643	2.08E-14		Ppid	5.57E-14	-0.28366429	0.775	0.957	1.22E-09
4932438A13Rik	3.45E-14	-0.274376487	0.88	0.94	7.54E-10		Dnaja3	0.002388708	0.375427565	1	0.757	1			Txnip	1.77E-40	-0.353081024	0.584	0.753	3.87E-36		Tmsb4x	2.02E-16	0.478729	0.909	0.886	4.41E-12			Usp37	9.65E-19	-0.32415408	0.629	0.878	2.11E-14		Xrn2	1.32E-14	-0.283722765	0.775	0.94	2.89E-10
Ywhaq	3.81E-14	0.25033526	0.971	0.978	8.32E-10		Snapc2	0.002394307	0.331885703	0.786	0.378	1			Tspan13	2.65E-40	0.302476381	0.845	0.761	5.78E-36		Rnf17	2.24E-16	-0.320347013	0.753	0.956	4.89E-12			Lsm7	9.66E-19	0.292593705	0.98	0.984	2.11E-14		Rbmxl2	4.67E-19	-0.28562278	0.234	0.723	1.02E-14
Hormad1	4.24E-14	-0.284581382	0.966	0.994	9.25E-10		Timm29	0.002439003	0.302221858	0.857	0.486	1			Nop10	5.77E-40	0.298992643	0.89	0.829	1.26E-35		Nsa2	2.41E-16	-0.295482582	0.864	0.991	5.26E-12			Zfp787	1.18E-18	0.335283844	0.839	0.765	2.57E-14		Tax1bp1	1.00E-16	-0.286705321	0.919	0.989	2.18E-12
Hccs	4.73E-14	0.295666243	0.851	0.868	1.03E-09		Sav1	0.002439003	-0.37649095	0.286	0.703	1			Bptf	7.55E-40	-0.316141231	0.587	0.745	1.65E-35		Spint2	2.55E-16	0.482316044	0.922	0.925	5.57E-12			Pfn1	1.18E-18	0.389350045	0.997	0.991	2.58E-14		Snrnp200	2.36E-12	-0.289876824	0.739	0.891	5.16E-08
Ociad1	5.30E-14	0.25232185	0.906	0.937	1.16E-09		Rpl18a	0.002454967	0.389860948	1	1	1			Tmsb10	1.13E-39	0.400564075	0.998	0.995	2.47E-35		Sumo3	2.62E-16	0.342471291	0.994	1	5.72E-12			Akr1b3	1.39E-18	0.401542403	0.946	0.937	3.03E-14		Actr10	5.87E-19	-0.290238283	0.829	0.954	1.28E-14
Yod1	5.35E-14	0.40016992	0.597	0.484	1.17E-09		Oat	0.002457587	0.362894363	0.929	0.649	1			Ap2s1	2.01E-39	0.262103809	0.905	0.854	4.38E-35		Gemin7	2.71E-16	0.363418733	0.838	0.9	5.92E-12			Mrpl55	1.61E-18	0.259201727	0.953	0.962	3.52E-14		Asf1a	2.45E-14	-0.290272646	0.919	0.997	5.35E-10
Itm2b	6.09E-14	0.256543471	0.951	0.956	1.33E-09		Eno1	0.002503315	0.409838383	0.929	0.595	1			Setd3	3.90E-39	-0.250093277	0.713	0.859	8.51E-35		Cox7a2	2.91E-16	0.257088902	1	1	6.35E-12			Bms1	1.71E-18	-0.300806897	0.682	0.862	3.74E-14		Bod1	2.51E-11	-0.292196398	0.622	0.967	5.47E-07
Emc4	7.94E-14	0.281209519	0.794	0.814	1.73E-09		Shb	0.002504198	-0.34582581	0.214	0.676	1			Gmps	4.35E-39	-0.272640582	0.762	0.87	9.50E-35		Pak1ip1	3.29E-16	-0.295190835	0.903	0.993	7.17E-12			Kit	1.95E-18	-0.444589522	0.799	0.906	4.25E-14		Larp4	7.37E-14	-0.292212035	0.721	0.899	1.61E-09
Rsl24d1	8.43E-14	0.266213473	0.869	0.912	1.84E-09		Atpif1	0.002522103	0.427723005	0.929	0.865	1			Pfn1	7.19E-39	0.328444006	0.954	0.935	1.57E-34		Rps25	3.31E-16	0.283397195	1	1	7.23E-12			Mlf2	2.04E-18	0.261135506	0.973	0.962	4.46E-14		Cops3	9.87E-17	-0.293538696	0.928	0.995	2.15E-12
Edf1	1.05E-13	0.273986099	0.903	0.921	2.29E-09		Rsph3b	0.00252909	0.339290959	0.571	0.162	1			Smndc1	8.99E-39	-0.286542509	0.603	0.772	1.96E-34		Dhx36	3.42E-16	-0.289292814	0.747	0.928	7.46E-12			Calm1	2.10E-18	0.275823022	1	0.997	4.59E-14		Zfp292	7.30E-10	-0.293623456	0.586	0.764	1.59E-05
Cope	1.08E-13	0.255711309	0.874	0.925	2.35E-09		Nktr	0.002541532	-0.486633312	0.929	0.973	1			1810022K09Rik	9.34E-39	-0.253562871	0.643	0.81	2.04E-34		Selenow	3.73E-16	0.566899517	0.89	0.769	8.14E-12			Wapl	2.17E-18	-0.334495949	0.749	0.937	4.74E-14		Unc13c	4.03E-14	-0.29419055	0.892	0.992	8.79E-10
Tm2d3	1.38E-13	0.264357148	0.94	0.943	3.01E-09		Sppl3	0.002554912	-0.337323953	0.5	0.865	1			Acbd3	2.66E-38	-0.253948373	0.587	0.775	5.81E-34		Zfp958	5.39E-16	-0.295775301	0.669	0.9	1.18E-11			Pnrc1	2.36E-18	-0.321326373	0.826	0.956	5.16E-14		Smarca5	2.31E-14	-0.294531939	0.955	0.997	5.03E-10
Mdh2	1.99E-13	0.26533193	0.94	0.962	4.34E-09		Cbx5	0.002602484	0.528377548	0.857	0.568	1			Grcc10	2.73E-38	0.263710892	0.585	0.394	5.95E-34		Gm42418	6.09E-16	-0.395987684	0.747	0.984	1.33E-11			Arpp19	3.52E-18	0.283083574	0.967	0.978	7.69E-14		Rest	4.32E-13	-0.294591458	0.82	0.97	9.42E-09
Ypel3	2.34E-13	0.315651631	0.917	0.896	5.11E-09		Ap2m1	0.002631474	0.536510149	1	0.946	1			Tax1bp1	6.69E-38	-0.257625032	0.876	0.906	1.46E-33		Ralbp1	6.17E-16	0.27368473	0.961	0.984	1.35E-11			Ubl7	3.71E-18	0.309412485	0.783	0.712	8.10E-14		Gatad2a	7.36E-17	-0.297491456	0.838	0.962	1.61E-12
Setx	2.63E-13	-0.268523485	0.683	0.912	5.73E-09		Nop14	0.002631474	-0.498499458	0.857	1	1			Galnt1	8.97E-38	-0.255384437	0.473	0.656	1.96E-33		Clint1	7.46E-16	-0.301110977	0.734	0.932	1.63E-11			Ndufs6	4.56E-18	0.276731093	1	0.984	9.95E-14		Jak1	1.18E-14	-0.299126169	0.811	0.913	2.58E-10
Fkbp8	2.85E-13	0.266805768	0.877	0.912	6.21E-09		Snu13	0.002632063	0.412818055	1	1	1			Prc1	3.01E-37	-0.399252109	0.661	0.795	6.56E-33		Sec61g	8.12E-16	0.345432838	1	1	1.77E-11			Srsf3	5.13E-18	-0.252727827	0.98	0.994	1.12E-13		Tnrc6c	1.36E-19	-0.302085655	0.577	0.867	2.98E-15
Hsp90b1	3.44E-13	-0.274109758	0.963	0.969	7.50E-09		Myl12a	0.002632063	0.311626722	1	1	1			Lsm12	5.66E-37	-0.268771369	0.709	0.852	1.23E-32		Snrpb2	8.55E-16	0.350224177	0.968	0.963	1.87E-11			Kif14	6.39E-18	-0.323189325	0.565	0.818	1.39E-13		Rpl23	6.32E-35	-0.302982312	1	1	1.38E-30
Raly	3.81E-13	0.276676795	0.954	0.965	8.31E-09		Srp68	0.00263677	0.293714495	0.929	0.649	1			Zfand6	1.02E-36	0.263173273	0.865	0.803	2.23E-32		Psmb5	1.40E-15	-0.268346746	0.974	1	3.05E-11			Ptpn2	8.30E-18	-0.27355613	0.709	0.884	1.81E-13		Enho	1.37E-17	-0.303266999	0.523	0.875	3.00E-13
Chchd4	4.75E-13	0.270193621	0.897	0.906	1.04E-08		Nsd2	0.002684336	-0.286196627	0.286	0.757	1			Gemin7	1.07E-36	0.251610506	0.826	0.788	2.33E-32		Mta3	1.62E-15	-0.283595354	0.786	0.96	3.53E-11			Slc25a39	9.19E-18	-0.260803556	0.632	0.837	2.00E-13		Dnaja1	8.88E-20	-0.303655567	0.955	1	1.94E-15
Hist1h2ap	5.30E-13	0.436238498	0.646	0.544	1.16E-08		Sf3b4	0.00274656	0.418131064	1	0.757	1			Dnttip1	1.31E-36	-0.258849621	0.739	0.877	2.85E-32		Hsbp1	1.65E-15	0.333317982	0.994	1	3.59E-11			Zbtb18	1.12E-17	-0.281533157	0.565	0.787	2.44E-13		Pcm1	4.80E-14	-0.305059476	0.829	0.946	1.05E-09
Pak2	5.50E-13	-0.250644815	0.743	0.934	1.20E-08		Tpst1	0.002780025	0.396255448	0.786	0.378	1			Med17	1.80E-36	-0.272725093	0.742	0.849	3.94E-32		Acbd3	1.77E-15	-0.272386709	0.63	0.893	3.85E-11			Rsl1d1	1.14E-17	-0.25175846	0.809	0.959	2.50E-13		Ddx10	3.62E-16	-0.305287851	0.901	0.976	7.91E-12
Psma7	6.53E-13	0.267526182	0.957	0.959	1.42E-08		Rock1	0.002818274	-0.483094908	1	0.919	1			2510039O18Rik	6.84E-36	0.277074218	0.67	0.542	1.49E-31		Ofd1	1.81E-15	-0.308043258	0.89	0.986	3.95E-11			Tmsb10	1.30E-17	0.420595887	1	1	2.84E-13		Cct3	2.19E-18	-0.306085993	1	1	4.78E-14
Psmb3	1.06E-12	0.285505049	0.831	0.833	2.31E-08		M1ap	0.002846005	0.891048813	0.714	0.27	1			Arf6	6.92E-36	0.25487097	0.787	0.73	1.51E-31		Htatsf1	1.89E-15	-0.29939593	0.896	0.988	4.14E-11			Hint1	1.32E-17	0.270656557	1	0.994	2.87E-13		Eid2	8.23E-31	-0.307113525	0.099	0.753	1.80E-26
Larp1b	1.09E-12	-0.278582505	0.817	0.953	2.37E-08		Dppa4	0.00299023	0.415761705	0.714	0.351	1			Rock2	8.39E-36	-0.296912761	0.541	0.689	1.83E-31		Naa38	2.33E-15	0.295724686	0.961	0.984	5.09E-11			Pnn	1.42E-17	-0.344771144	0.786	0.871	3.10E-13		Hnrnpf	9.24E-21	-0.30808169	0.982	1	2.02E-16
Tmem9b	1.27E-12	0.294310022	0.643	0.597	2.77E-08		Nr3c1	0.003004963	0.409316809	0.643	0.27	1			Emc7	1.07E-35	0.259070151	0.843	0.797	2.34E-31		Mrpl32	2.45E-15	-0.300773448	0.883	0.986	5.34E-11			Ap2m1	1.50E-17	0.284128945	0.933	0.912	3.28E-13		Afdn	2.15E-14	-0.308605276	0.892	0.986	4.69E-10
Fkbp2	1.28E-12	0.27039943	0.891	0.912	2.79E-08		Tsen34	0.003015504	0.258498458	0.571	0.162	1			Adipor1	1.50E-35	0.273255542	0.729	0.626	3.27E-31		Ubn2	2.60E-15	-0.28001191	0.519	0.78	5.67E-11			Cenpv	1.53E-17	-0.330063652	0.702	0.956	3.33E-13		Rif1	3.19E-10	-0.309799483	0.838	0.902	6.96E-06
Prdx5	1.30E-12	0.25010779	0.92	0.925	2.84E-08		Arl6ip1	0.003021748	0.605356556	1	0.973	1			Hectd1	1.58E-35	-0.265892652	0.738	0.885	3.44E-31		Ddx10	3.00E-15	-0.25570697	0.89	0.986	6.55E-11			Spata5	1.61E-17	-0.305287233	0.896	0.956	3.51E-13		Acadl	3.11E-16	-0.311052655	0.766	0.951	6.78E-12
Phb2	1.36E-12	0.259522872	0.926	0.95	2.96E-08		Pcbp2	0.003021748	0.399167178	1	1	1			AI314180	1.72E-35	-0.26444853	0.578	0.732	3.75E-31		Mien1	3.15E-15	0.317713844	0.994	0.993	6.86E-11			Micu2	1.89E-17	-0.253269917	0.609	0.853	4.13E-13		Srsf3	1.46E-16	-0.3119888	0.964	0.997	3.19E-12
Nop10	1.78E-12	0.300715231	0.831	0.849	3.89E-08		2310011J03Rik	0.003025268	0.330487376	0.857	0.486	1			Smchd1	2.09E-35	-0.276035285	0.76	0.886	4.56E-31		Cecr2	3.35E-15	-0.268926107	0.565	0.853	7.32E-11			Cnot6l	2.16E-17	-0.277130774	0.559	0.824	4.71E-13		Zfp958	5.86E-17	-0.312526758	0.838	0.978	1.28E-12
Lgals1	2.48E-12	0.279219351	0.443	0.267	5.40E-08		Larp1b	0.003070452	-0.720687215	0.643	0.919	1			Phb	3.36E-35	0.25309364	0.882	0.818	7.34E-31		Lyplal1	4.12E-15	-0.286822722	0.695	0.942	9.00E-11			Zfp746	2.35E-17	-0.273586956	0.431	0.74	5.14E-13		Psmd6	1.29E-18	-0.313048152	0.964	0.997	2.83E-14
Ring1	2.86E-12	0.284048783	0.643	0.616	6.24E-08		Axin1	0.003076882	-0.41446717	0.286	0.676	1			Cenpf	4.82E-35	-0.299042701	0.85	0.903	1.05E-30		Gstm1	4.42E-15	0.302536562	0.545	0.262	9.65E-11			Zcchc2	2.51E-17	-0.250908564	0.438	0.724	5.47E-13		BC005561	5.92E-06	-0.31516498	0.658	0.802	0.129118096
0610010K14Rik	3.06E-12	0.251335515	0.891	0.899	6.68E-08		Rnf13	0.003077068	0.285573167	0.714	0.27	1			Hsph1	5.31E-35	-0.273319144	0.705	0.822	1.16E-30		Csnk1e	4.54E-15	-0.344633329	0.825	0.991	9.92E-11			Hectd1	2.87E-17	-0.337463619	0.786	0.934	6.25E-13		Spata5	4.02E-17	-0.315353853	0.847	0.97	8.77E-13
Ftl1	3.07E-12	0.38437376	0.991	0.997	6.71E-08		Ext2	0.003128679	0.32133252	0.786	0.405	1			Malat1	6.99E-35	0.354741061	0.854	0.694	1.53E-30		Pcbp2	4.59E-15	0.255370833	0.981	1	1.00E-10			Trim71	2.90E-17	-0.341419131	0.682	0.875	6.33E-13		Cds1	2.47E-16	-0.316514466	0.613	0.916	5.40E-12
Tma7	3.37E-12	0.266678241	0.863	0.849	7.36E-08		Nucb1	0.003176395	0.420613513	0.857	0.514	1			Hook1	1.48E-34	-0.262318782	0.714	0.827	3.23E-30		Cenpv	4.70E-15	-0.33179488	0.695	0.986	1.03E-10			Pmpcb	2.93E-17	-0.270499215	0.699	0.881	6.39E-13		Csnk1a1	1.04E-19	-0.316990836	0.946	1	2.27E-15
Ap2m1	3.71E-12	0.274262429	0.897	0.893	8.11E-08		Tmsb4x	0.003211387	0.423564019	1	0.838	1			Clptm1	1.65E-34	0.270094424	0.744	0.66	3.60E-30		Srsf3	6.28E-15	-0.262915705	0.961	1	1.37E-10			Ap3s1	3.37E-17	0.303962691	0.92	0.865	7.35E-13		Dicer1	1.05E-17	-0.31709627	0.964	1	2.29E-13
Ergic3	5.03E-12	0.254644216	0.96	0.969	1.10E-07		Zfp106	0.003221798	-0.3848254	0.857	0.919	1			Nutf2	1.66E-34	0.262745479	0.534	0.361	3.62E-30		Pcm1	6.49E-15	-0.29465381	0.792	0.893	1.42E-10			Tuba1b	4.51E-17	0.406763664	0.977	0.956	9.85E-13		Depdc7	1.43E-15	-0.318514656	0.595	0.908	3.11E-11
Tra2b	6.44E-12	0.278935529	0.937	0.928	1.40E-07		Smchd1	0.003221798	-0.396629445	0.786	0.946	1			Pkm	3.27E-34	0.254723053	0.963	0.953	7.14E-30		Ndufb4	9.71E-15	0.255850591	0.994	1	2.12E-10			Hsph1	5.24E-17	-0.309201343	0.739	0.859	1.14E-12		Rad50	2.06E-14	-0.319405381	0.964	1	4.50E-10
Bud31	7.28E-12	0.267612912	0.846	0.884	1.59E-07		D730045A05Rik	0.00330283	0.324122189	0.429	0.081	1			Bms1	5.01E-34	-0.274647408	0.652	0.778	1.09E-29		Luc7l3	1.08E-14	-0.303720439	0.825	0.963	2.35E-10			Wnk1	5.78E-17	-0.323328612	0.829	0.937	1.26E-12		Taf15	4.22E-16	-0.321039745	0.595	0.861	9.20E-12
Apoo	1.50E-11	0.266883809	0.943	0.943	3.27E-07		1700123O20Rik	0.003328872	0.262903592	0.929	0.541	1			Trim71	1.09E-33	-0.255801687	0.472	0.667	2.37E-29		Snrnp200	1.08E-14	-0.291742699	0.688	0.902	2.35E-10			Dcaf1	6.78E-17	-0.25454341	0.465	0.737	1.48E-12		Zfp644	3.36E-15	-0.321823414	0.775	0.965	7.33E-11
Tex19.1	1.57E-11	0.322740342	0.869	0.855	3.42E-07		Afdn	0.003340635	-0.470331782	0.786	0.973	1			Rabep1	2.77E-33	-0.25421702	0.744	0.837	6.04E-29		Skiv2l2	1.13E-14	-0.256058155	0.708	0.897	2.47E-10			Clasp1	7.48E-17	-0.277304073	0.478	0.765	1.63E-12		Eif3m	3.97E-22	-0.322235792	0.955	1	8.67E-18
Rraga	5.02E-11	0.25530753	0.771	0.752	1.10E-06		Tsc22d3	0.003375769	0.67554852	0.929	0.784	1			Ap3s1	3.33E-33	0.259781151	0.824	0.751	7.26E-29		Spata5	1.24E-14	-0.269709027	0.87	0.991	2.70E-10			Gpn3	8.44E-17	-0.255944396	0.749	0.893	1.84E-12		Bptf	7.00E-14	-0.322545847	0.658	0.856	1.53E-09
Tpgs1	5.87E-11	0.257352752	0.637	0.594	1.28E-06		Rtn3	0.003375769	0.469247828	0.929	0.784	1			Rabgap1	8.76E-33	-0.258146629	0.675	0.818	1.91E-28		Psmb7	1.53E-14	0.267497807	1	0.998	3.35E-10			Poldip2	8.49E-17	0.271473123	0.839	0.818	1.85E-12		Dhx36	3.30E-15	-0.324344097	0.73	0.91	7.20E-11
Pkm	6.85E-11	0.298481808	0.96	0.965	1.49E-06		Nutf2	0.003401241	0.397639299	0.643	0.243	1			Usp50	2.19E-32	0.270340244	0.599	0.442	4.77E-28		Spcs1	1.58E-14	0.300789694	0.955	0.953	3.44E-10			Ube2d2a	8.89E-17	0.254837244	0.903	0.909	1.94E-12		Mta1	2.01E-15	-0.324923221	0.631	0.913	4.38E-11
Ap2s1	8.14E-11	0.25309493	0.851	0.881	1.78E-06		Alkbh1	0.003401241	0.330216772	0.643	0.243	1			Trpm7	2.73E-32	-0.257043037	0.591	0.738	5.95E-28		Taf15	1.78E-14	-0.265957181	0.565	0.853	3.88E-10			Bub1	9.95E-17	-0.263067475	0.739	0.887	2.17E-12		2810474O19Rik	3.04E-15	-0.325313669	0.658	0.894	6.63E-11
Aen	8.37E-11	0.367110947	0.877	0.874	1.83E-06		Usp7	0.003429141	-0.454154953	0.571	0.811	1			Cdc42bpa	3.69E-32	-0.266224556	0.433	0.619	8.06E-28		Taf5	1.96E-14	-0.282354941	0.831	0.974	4.29E-10			Mien1	1.32E-16	0.252561351	0.987	0.972	2.88E-12		7-Mar	1.55E-15	-0.327220333	0.784	0.935	3.38E-11
Ier3ip1	9.72E-11	0.257818488	0.917	0.934	2.12E-06		Wasl	0.003448696	-0.352471885	0.857	0.919	1			Psmc1	4.74E-32	0.266483112	0.882	0.83	1.03E-27		Snx6	2.30E-14	-0.251538472	0.935	0.988	5.02E-10			Agfg1	1.36E-16	-0.269260553	0.569	0.834	2.96E-12		Ppp2ca	4.06E-18	-0.327765919	0.784	0.965	8.86E-14
Ndufs8	1.47E-10	0.251167488	0.7	0.67	3.21E-06		Dnttip2	0.00346045	-0.435842427	0.929	0.946	1			Psme3	2.77E-31	0.252772139	0.677	0.556	6.04E-27		Rab11a	2.30E-14	0.259603631	0.987	0.998	5.03E-10			Fbxw7	1.56E-16	-0.305100459	0.672	0.878	3.40E-12		Rps2	1.09E-33	-0.332303145	1	1	2.38E-29
Pcna	4.08E-10	0.255609233	0.794	0.858	8.89E-06		Drap1	0.003463392	-0.456403118	0.929	1	1			Tex101	8.58E-31	0.313738913	0.877	0.781	1.87E-26		Higd1a	2.70E-14	0.28487208	0.994	0.995	5.89E-10			Jak1	1.81E-16	-0.293656834	0.722	0.868	3.94E-12		Qk	2.32E-21	-0.334097324	0.568	0.861	5.06E-17
Rab24	1.32E-09	0.264758914	0.806	0.862	2.87E-05		Rab40c	0.003471026	0.281724754	0.571	0.189	1			Fbxw7	1.27E-30	-0.250623983	0.652	0.826	2.77E-26		Arf5	2.86E-14	0.265649386	0.994	1	6.24E-10			Smndc1	1.84E-16	-0.280505068	0.709	0.9	4.01E-12		G3bp2	5.13E-19	-0.3343939	1	1	1.12E-14
Dnpep	1.36E-09	0.271026268	0.831	0.849	2.98E-05		Ptprs	0.003484704	-0.307998538	0.357	0.676	1			Wnk1	1.31E-30	-0.269004494	0.735	0.864	2.85E-26		Rars	3.37E-14	-0.262456247	0.818	0.965	7.35E-10			Naxe	1.86E-16	0.252568927	0.98	0.962	4.05E-12		Nmd3	6.63E-16	-0.339382931	0.91	0.997	1.45E-11
Ncaph2	2.30E-09	0.255127083	0.726	0.73	5.02E-05		Tmbim6	0.00351945	0.383738514	0.857	0.649	1			Ddx6	3.59E-30	-0.251209045	0.603	0.741	7.84E-26		Clptm1	3.90E-14	0.286587291	0.857	0.907	8.51E-10			Riox2	2.71E-16	-0.256872905	0.766	0.903	5.91E-12		Tcfl5	5.98E-28	-0.342682092	0.396	0.864	1.31E-23
Snapc2	7.55E-09	0.251065362	0.531	0.462	0.000164818		Rrm2	0.003628698	0.528201636	0.643	0.324	1			Elp5	6.34E-30	0.255627207	0.783	0.694	1.38E-25		Smarca5	4.93E-14	-0.275906395	0.987	0.995	1.08E-09			Rsl24d1	2.87E-16	0.257570205	0.98	0.937	6.25E-12		Sf3b1	6.27E-20	-0.344192003	0.955	0.986	1.37E-15
Ccdc73	1.76E-08	-0.273858531	0.946	0.991	0.00038508		Ep300	0.003671204	-0.342252175	0.5	0.838	1			Kdm1a	6.32E-29	-0.255044548	0.628	0.778	1.38E-24		Tomm7	4.96E-14	0.301959904	0.981	0.988	1.08E-09			Lsm12	2.88E-16	-0.272657635	0.776	0.934	6.29E-12		Ctsl	6.87E-14	-0.344737313	0.937	0.989	1.50E-09
Tuba1b	3.32E-08	0.255272957	0.646	0.651	0.000724478		Hnrnpc	0.003705564	0.396848966	1	1	1			Zfp787	5.32E-28	0.257690623	0.717	0.61	1.16E-23		Hras	5.35E-14	-0.276491878	0.688	0.949	1.17E-09			Tpr	3.06E-16	-0.268577378	0.953	0.975	6.68E-12		Vta1	1.03E-17	-0.344919634	0.856	0.986	2.24E-13
Gm11985	1.15E-06	0.274920371	0.823	0.814	0.025082259		Eef2	0.003705564	0.369226991	1	1	1			Tuba1b	6.33E-28	0.326309612	0.81	0.712	1.38E-23		Mrps31	5.65E-14	-0.255955641	0.63	0.907	1.23E-09			Cecr2	3.41E-16	-0.318095027	0.672	0.865	7.44E-12		Dkc1	5.43E-17	-0.346230726	0.748	0.932	1.19E-12
Dppa3	1.66E-06	0.301219782	0.663	0.579	0.036216041		Rps23	0.003705564	0.359579213	1	1	1			Fmr1nb	4.45E-27	0.26477893	0.886	0.801	9.71E-23		Get4	6.39E-14	0.291923	0.864	0.886	1.40E-09			Atad2	3.42E-16	-0.305460675	0.652	0.865	7.45E-12		Hectd1	9.61E-17	-0.347174803	0.721	0.938	2.10E-12
Zfp207	1.50E-05	0.251509047	0.783	0.852	0.326724633		Huwe1	0.003705564	-0.384945185	0.929	1	1			Lsm14b	1.87E-26	-0.258005871	0.796	0.927	4.08E-22		Lgals1	6.45E-14	0.299741243	0.623	0.374	1.41E-09			Atox1	4.02E-16	0.261486939	0.99	0.947	8.78E-12		Ube2r2	2.71E-17	-0.347207534	0.676	0.935	5.91E-13
Ckb	0.000165641	0.349225756	0.609	0.557	1		Mphosph6	0.003725087	-0.548008547	0.5	0.811	1			Macf1	5.16E-26	-0.265485369	0.6	0.733	1.13E-21		Gm33301	7.05E-14	0.344719524	0.552	0.311	1.54E-09			Akap12	4.34E-16	-0.377848711	0.508	0.755	9.47E-12		Ankrd11	6.45E-15	-0.347438552	0.523	0.818	1.41E-10
Sohlh1	0.000170988	0.282694669	0.777	0.774	1		Pigu	0.003726502	0.291728224	0.786	0.378	1			Lonrf3	1.07E-24	-0.264813547	0.482	0.647	2.34E-20		Wdr76	8.14E-14	-0.272290096	0.571	0.862	1.78E-09			Mrpl40	4.40E-16	0.27335736	0.923	0.862	9.59E-12		Rps3a1	1.75E-39	-0.347982008	1	1	3.81E-35
Tsga8	0.041774927	0.333218289	0.326	0.296	1		Rexo2	0.003785097	-0.476068699	0.5	0.892	1			2810474O19Rik	1.61E-24	-0.258202774	0.595	0.699	3.52E-20		Ube2w	9.40E-14	0.305725555	0.955	0.958	2.05E-09			Bud31	5.05E-16	0.263154712	0.936	0.934	1.10E-11		Esd	7.34E-27	-0.348527054	0.991	0.997	1.60E-22
Rpgrip1	0.762647561	0.25612621	0.594	0.805	1		Nsun6	0.003800471	0.369180372	0.643	0.27	1			Kif4	2.03E-24	-0.255250662	0.541	0.688	4.44E-20		H2afj	1.03E-13	0.354158805	0.929	0.944	2.24E-09			Luc7l3	6.40E-16	-0.331928114	0.773	0.918	1.40E-11		Ccar1	4.69E-16	-0.348543482	0.784	0.946	1.02E-11
							Dicer1	0.003804466	-0.437860003	0.643	0.973	1			Id1	2.77E-24	-0.302786753	0.969	0.988	6.05E-20		Ktn1	1.32E-13	-0.288311914	0.922	0.977	2.89E-09			Mphosph8	6.71E-16	-0.311838043	0.953	0.956	1.46E-11		Ola1	2.03E-20	-0.348998147	0.847	0.959	4.42E-16
							Ube2j2	0.003831536	0.386222929	0.929	0.973	1			4930447C04Rik	7.65E-24	-0.302898472	0.863	0.903	1.67E-19		Wnk1	1.40E-13	-0.29630501	0.792	0.949	3.05E-09			Hsp90b1	1.11E-15	-0.36935519	0.863	0.925	2.42E-11		Uchl3	2.45E-20	-0.349029507	0.91	0.992	5.36E-16
							Akap12	0.003912798	-0.442520628	0.071	0.541	1			Ptp4a1	3.82E-23	0.25090832	0.685	0.573	8.33E-19		Ube2g1	1.57E-13	0.284569088	0.955	0.956	3.44E-09			Xrcc6	1.41E-15	-0.261298127	0.816	0.931	3.07E-11		Taf10	6.86E-13	-0.353781102	0.865	1	1.50E-08
							Bod1	0.003934407	-0.318803373	0.714	0.946	1			Dlk1	4.18E-21	0.258794272	0.72	0.627	9.13E-17		Rif1	1.59E-13	-0.338386991	0.779	0.897	3.47E-09			Mrpl32	1.44E-15	-0.262826434	0.873	0.95	3.15E-11		Ranbp9	1.00E-23	-0.354591215	0.586	0.897	2.19E-19
							Gdpd1	0.003934407	-0.613677382	0.714	0.946	1			Tsc22d3	4.83E-21	0.2779285	0.787	0.719	1.05E-16		Brix1	1.72E-13	-0.258206878	0.818	0.977	3.76E-09			Polr2l	1.46E-15	0.276167456	0.916	0.89	3.18E-11		Rack1	1.45E-25	-0.356683119	1	1	3.16E-21
							Kat2a	0.00394	0.450493484	0.786	0.486	1			Hes1	9.11E-19	-0.3071431	0.558	0.686	1.99E-14		Tra2b	1.85E-13	0.296942288	0.831	0.839	4.04E-09			Ndufb9	1.57E-15	0.252270112	0.983	0.978	3.42E-11		Rnf17	2.64E-19	-0.356784303	0.739	0.918	5.76E-15
							Morf4l2	0.003959756	0.532149884	0.857	0.973	1			Nexn	2.77E-18	-0.277479288	0.662	0.747	6.05E-14		Nexn	1.91E-13	-0.291640581	0.747	0.937	4.16E-09			Rabgap1	1.63E-15	-0.279384836	0.719	0.893	3.56E-11		Atrx	1.08E-12	-0.357136439	0.757	0.875	2.36E-08
							Ssr4	0.003962214	0.395320114	1	0.946	1			Rif1	5.57E-18	-0.273128703	0.786	0.837	1.22E-13		Yeats4	1.93E-13	-0.264105425	0.792	0.951	4.21E-09			Srp72	1.73E-15	-0.251944618	0.886	0.944	3.77E-11		Fxr1	2.21E-28	-0.357844345	0.973	1	4.83E-24
							Ssr2	0.003963033	0.355916349	1	1	1			mt-Nd5	6.37E-18	-0.378341142	0.793	0.768	1.39E-13		Kit	3.00E-13	-0.316896332	0.844	0.979	6.55E-09			Usp50	1.78E-15	0.342048604	0.773	0.687	3.88E-11		Pnrc1	2.75E-19	-0.360823056	0.982	1	6.00E-15
							Alg13	0.003963033	-0.488859034	1	1	1			Ldhb	1.52E-14	0.260961974	0.809	0.699	3.32E-10		Usp9x	3.79E-13	-0.291867613	0.792	0.942	8.27E-09			Rock2	1.87E-15	-0.305394681	0.599	0.799	4.08E-11		Cenpv	1.06E-15	-0.36410467	0.64	0.948	2.31E-11
							Pigt	0.004093584	0.293906217	0.929	0.541	1			Tex15	6.89E-10	-0.263572855	0.96	0.984	1.50E-05		Tpr	4.96E-13	-0.2547032	0.948	0.995	1.08E-08			Usp9x	2.14E-15	-0.323712637	0.839	0.95	4.67E-11		Ofd1	4.99E-16	-0.364443001	0.892	0.986	1.09E-11
							Dcaf11	0.004093584	0.282444365	0.929	0.541	1			mt-Co1	3.04E-07	-0.264895304	0.991	0.974	0.00664388		Phpt1	5.41E-13	0.321806536	0.656	0.519	1.18E-08			Irf2bp2	2.53E-15	-0.254030702	0.478	0.752	5.52E-11		Hsp90ab1	1.81E-36	-0.364590509	1	1	3.95E-32
							Trappc1	0.00413315	0.367275241	0.786	0.459	1										Aktip	6.12E-13	0.274782306	0.851	0.897	1.34E-08			Larp1b	3.58E-15	-0.297008996	0.729	0.937	7.82E-11		Rps21	1.06E-31	-0.365863874	1	1	2.31E-27
							Tmem131	0.00413315	-0.314235383	0.214	0.676	1										Birc6	6.22E-13	-0.255861185	0.688	0.886	1.36E-08			Ier3ip1	3.84E-15	0.336283687	0.87	0.831	8.37E-11		Ooep	2.78E-07	-0.367214188	1	1	0.006063356
							Ifngr1	0.00415191	0.313375793	0.5	0.162	1										4933434E20Rik	6.45E-13	0.334731851	0.792	0.783	1.41E-08			Calm2	4.14E-15	0.280842806	0.987	0.978	9.04E-11		Pak1ip1	5.72E-24	-0.374429865	0.937	0.997	1.25E-19
							Zranb1	0.004188396	-0.387654149	0.714	0.919	1										Xrn2	7.48E-13	-0.259456983	0.805	0.946	1.63E-08			Nos1	4.99E-15	-0.304856431	0.562	0.796	1.09E-10		Brd1	1.96E-28	-0.375255825	0.396	0.859	4.28E-24
							Kdelr2	0.004206452	0.341794279	1	0.838	1										Macf1	8.77E-13	-0.307557391	0.669	0.893	1.91E-08			Zcchc7	5.01E-15	-0.256542761	0.635	0.85	1.09E-10		Macf1	2.46E-14	-0.379903453	0.694	0.905	5.38E-10
							Add2	0.004216957	-0.286388005	0.071	0.541	1										Ccar1	9.46E-13	-0.272154763	0.799	0.923	2.06E-08			Smc4	7.33E-15	-0.29506814	0.933	0.991	1.60E-10		mt-Co1	1.84E-16	-0.381449847	1	0.997	4.02E-12
							Mfsd1	0.00422415	0.356992373	0.786	0.486	1										Ctsl	1.03E-12	-0.277269027	0.831	0.939	2.26E-08			Ccdc90b	7.72E-15	-0.294776473	0.726	0.893	1.68E-10		Taf5	7.00E-24	-0.383544337	0.856	0.973	1.53E-19
							Mtus1	0.004230849	-0.289109963	0	0.432	1										Prc1	1.16E-12	-0.299506474	0.805	0.974	2.53E-08			Tspan3	8.66E-15	0.298732757	0.849	0.821	1.89E-10		Tubb4b	1.19E-24	-0.38426599	1	1	2.60E-20
							Rbbp4	0.004233188	-0.31583996	0.929	0.946	1										Impdh2	1.26E-12	0.315627342	0.935	0.97	2.75E-08			Map1lc3a	9.14E-15	0.268525425	0.946	0.934	2.00E-10		Dnaja2	5.33E-31	-0.394124195	0.982	1	1.16E-26
							Cdk10	0.004252722	0.276057134	0.571	0.162	1										Pmf1	1.27E-12	0.281676375	0.844	0.86	2.76E-08			Grcc10	1.06E-14	0.282993585	0.672	0.52	2.31E-10		Gtf2b	2.45E-19	-0.394962907	0.802	0.984	5.35E-15
							Spg7	0.00426462	0.314400007	0.929	0.649	1										Lamtor5	1.30E-12	0.319932975	0.968	0.991	2.84E-08			Acbd3	1.19E-14	-0.260969946	0.589	0.815	2.60E-10		Gm42418	2.76E-13	-0.398675575	0.721	0.986	6.02E-09
							Ndufaf4	0.004270936	0.363318491	0.857	0.73	1										Brk1	1.40E-12	0.26202573	0.935	0.965	3.06E-08			Wdr26	1.57E-14	-0.282994011	0.592	0.828	3.42E-10		Txnl1	2.05E-26	-0.401304649	0.955	1	4.48E-22
							Rnf114	0.004305585	0.326668281	0.929	0.811	1										Taf10	1.81E-12	-0.289548503	0.942	0.998	3.95E-08			Nucks1	1.70E-14	-0.253282908	0.903	0.975	3.71E-10		Rras	8.33E-25	-0.407246931	0.541	0.918	1.82E-20
							Aco2	0.004329335	0.48295847	0.929	0.73	1										Fip1l1	2.22E-12	-0.260434368	0.805	0.981	4.84E-08			Mark3	2.01E-14	-0.281656845	0.635	0.856	4.38E-10		Vdac2	1.64E-28	-0.408985815	0.928	0.997	3.57E-24
							Kit	0.004329335	-0.478959604	0.571	0.865	1										Zfand6	3.08E-12	0.250449606	0.955	0.977	6.73E-08			Xrn2	2.10E-14	-0.2591965	0.806	0.906	4.58E-10		Cop1	6.49E-26	-0.409056483	0.631	0.921	1.42E-21
							Tmtc4	0.00434238	-0.450156549	0.214	0.757	1										Rap1a	3.47E-12	-0.26164056	0.799	0.972	7.57E-08			Ubap2	2.22E-14	-0.260724047	0.836	0.956	4.85E-10		Smad4	6.06E-28	-0.40959192	0.55	0.899	1.32E-23
							8030474K03Rik	0.004495452	0.38380988	1	0.838	1										Ube2c	3.98E-12	-0.360877911	0.981	0.998	8.69E-08			Raly	2.25E-14	0.257896489	0.943	0.944	4.91E-10		Smchd1	1.15E-21	-0.413019887	0.784	0.959	2.52E-17
							Ubb	0.004527281	0.296732166	1	1	1										Cdk1	4.01E-12	-0.258560015	0.87	0.977	8.75E-08			Myh9	3.63E-14	-0.263933332	0.415	0.693	7.92E-10		Rars	2.42E-26	-0.421956353	0.865	0.986	5.27E-22
							Ddx39	0.004619252	0.335746945	0.786	0.378	1										Ctsd	4.57E-12	0.329186056	0.961	0.949	9.97E-08			Casp8ap2	4.39E-14	-0.271565179	0.559	0.768	9.58E-10		Egln1	3.51E-31	-0.426852666	0.324	0.853	7.66E-27
							Tspan13	0.004627241	-0.455103999	0.571	0.865	1										Zfp787	5.27E-12	0.300833449	0.903	0.921	1.15E-07			Rab11a	4.67E-14	0.260716363	0.967	0.928	1.02E-09		Ddx6	8.10E-22	-0.429286358	0.856	0.962	1.77E-17
							Ino80e	0.004680177	0.357825099	0.857	0.595	1										D10Wsu102e	1.41E-11	-0.447957355	0.799	0.972	3.08E-07			Diaph3	5.51E-14	-0.259466483	0.709	0.859	1.20E-09		Hspd1	8.65E-32	-0.430682267	1	1	1.89E-27
							Btf3l4	0.004719837	0.30331903	0.929	0.703	1										Cenpf	1.46E-11	-0.286682596	0.786	0.949	3.18E-07			Yy1	7.19E-14	-0.27545854	0.645	0.868	1.57E-09		Cct8	6.96E-34	-0.432106582	1	1	1.52E-29
							Xlr4a	0.004782267	0.492559634	0.857	0.865	1										Prrc2c	1.55E-11	-0.283003403	0.831	0.974	3.38E-07			Ube2r2	8.58E-14	-0.26241941	0.686	0.878	1.87E-09		D10Wsu102e	5.83E-09	-0.432587635	0.928	0.989	0.000127137
							Ppp6r3	0.004785599	-0.30795702	0.143	0.622	1										Skp1a	1.68E-11	0.359941766	1	1	3.67E-07			Bod1l	1.02E-13	-0.295699602	0.595	0.781	2.23E-09		Rpl12	1.91E-41	-0.438895858	1	1	4.17E-37
							Naca	0.004835864	-0.301410491	0.929	1	1										Smarcc1	1.88E-11	-0.259131009	0.864	0.958	4.10E-07			Tex264	1.19E-13	0.304766187	0.823	0.865	2.61E-09		Ttn	0.000207901	-0.439370593	0.495	0.598	1
							Majin	0.004938781	0.428856092	0.429	0.081	1										Tmem106c	2.09E-11	0.303908616	0.877	0.907	4.55E-07			Ktn1	1.24E-13	-0.287134737	0.86	0.947	2.71E-09		Copb2	5.90E-27	-0.440655686	0.901	0.992	1.29E-22
							Tuba3a	0.004967888	0.504541503	0.571	0.216	1										2810474O19Rik	2.15E-11	-0.265178794	0.682	0.893	4.69E-07			Eif4enif1	1.61E-13	-0.268460586	0.682	0.853	3.52E-09		Mpp6	2.42E-27	-0.441254241	0.865	0.992	5.28E-23
							2610524H06Rik	0.00500535	0.357139285	0.857	0.541	1										Hnrnpc	2.24E-11	0.282322457	0.961	0.974	4.88E-07			Tex15	3.18E-13	-0.498291535	0.916	0.984	6.93E-09		Txnip	2.05E-21	-0.442391054	0.883	0.986	4.48E-17
							Zfp42	0.005017606	0.329673885	0.857	0.459	1										Stk25	2.25E-11	0.259224776	0.981	0.979	4.92E-07			Prpf8	3.42E-13	-0.253920561	0.585	0.768	7.47E-09		Larp1b	3.15E-25	-0.444398537	0.721	0.984	6.88E-21
							Gpr137c	0.005146384	-0.39649657	0.286	0.73	1										Prkaca	2.26E-11	0.276950031	0.721	0.605	4.92E-07			R3hdm1	3.75E-13	-0.28305791	0.746	0.884	8.18E-09		Rps20	3.37E-47	-0.449820367	1	1	7.36E-43
							Anapc13	0.00515325	0.354445331	1	0.892	1										Chd4	4.24E-11	-0.266295161	0.701	0.93	9.24E-07			Cenpe	3.79E-13	-0.258923115	0.732	0.878	8.28E-09		Eef1a1	1.76E-34	-0.460482852	1	1	3.85E-30
							Rpl21	0.005163355	-0.293545888	1	1	1										Btf3l4	4.45E-11	0.296635194	0.857	0.888	9.70E-07			Iws1	4.50E-13	-0.257617556	0.562	0.774	9.83E-09		mt-Nd5	1.17E-19	-0.464213284	0.874	0.951	2.55E-15
							Nmd3	0.005163355	-0.372397157	0.929	1	1										1700018B24Rik	4.49E-11	0.373387992	0.903	0.907	9.81E-07			Ndufa12	5.12E-13	0.254041007	0.967	0.972	1.12E-08		Wdfy1	1.62E-37	-0.465795358	0.153	0.826	3.53E-33
							Cotl1	0.005235702	0.309514131	0.714	0.27	1										Higd2a	5.42E-11	0.26108316	0.994	0.984	1.18E-06			Sbno1	6.26E-13	-0.25949205	0.756	0.9	1.37E-08		Cul4b	3.04E-28	-0.466743182	0.694	0.959	6.64E-24
							Aurka	0.005262443	0.372756743	0.643	0.324	1										Cox6b2	7.83E-11	0.411049015	0.851	0.86	1.71E-06			Pdcl3	6.59E-13	-0.261531863	0.716	0.897	1.44E-08		Hsp90b1	4.50E-23	-0.47379785	0.919	0.984	9.82E-19
							Babam1	0.005279375	0.420191606	0.929	0.73	1										Med28	8.40E-11	0.26128276	0.994	1	1.83E-06			Baz1b	7.75E-13	-0.259096476	0.552	0.762	1.69E-08		H1fx	2.19E-27	-0.478392297	0.486	0.908	4.78E-23
							Henmt1	0.005317671	-0.3085831	0.214	0.595	1										Ubl7	9.15E-11	0.254898492	0.799	0.804	2.00E-06			Cdkn2a	8.07E-13	0.344801206	0.866	0.777	1.76E-08		Rcc2	1.52E-32	-0.482047982	0.667	0.965	3.31E-28
							Id1	0.005371055	-1.150926565	0.286	0.676	1										Zfp292	9.94E-11	-0.318804425	0.617	0.773	2.17E-06			Adipor1	9.37E-13	0.255507342	0.813	0.806	2.04E-08		Hspa4	8.75E-30	-0.483013925	0.91	1	1.91E-25
							Ubr5	0.005383869	-0.372171351	0.571	0.919	1										Ndufa12	1.17E-10	0.283315719	1	0.998	2.55E-06			Pak2	1.06E-12	-0.273158649	0.722	0.875	2.31E-08		Alyref	5.16E-26	-0.485301785	0.856	1	1.13E-21
							Emc4	0.005473581	0.318319077	1	0.838	1										Sdhc	1.18E-10	0.266295588	0.929	0.909	2.57E-06			Mdn1	1.08E-12	-0.275237626	0.592	0.784	2.36E-08		Eif3a	1.67E-24	-0.494396873	0.838	0.981	3.64E-20
							Lsm14b	0.005473581	-0.426175481	0.714	0.946	1										Mov10l1	1.41E-10	-0.321768029	0.831	0.97	3.09E-06			Phb	1.16E-12	0.289552167	0.953	0.937	2.52E-08		Hnrnpd	4.73E-28	-0.495683882	0.694	0.984	1.03E-23
							Necap1	0.005499164	0.399193097	0.714	0.459	1										Nipsnap2	1.54E-10	0.28210316	0.844	0.89	3.35E-06			Psmc1	1.40E-12	0.254972599	0.95	0.918	3.07E-08		mt-Cytb	7.29E-24	-0.49574415	1	0.997	1.59E-19
							Focad	0.005504013	0.452024731	0.857	0.514	1										Cope	1.58E-10	0.252489742	0.942	0.986	3.45E-06			Birc6	1.52E-12	-0.261768646	0.679	0.846	3.33E-08		Ppp2r5c	1.54E-34	-0.498771213	0.64	0.962	3.36E-30
							Ftl1	0.005510759	0.799295445	1	1	1										Sf3a2	1.62E-10	0.267631269	0.76	0.839	3.53E-06			Taf1d	1.59E-12	-0.293465178	0.846	0.871	3.47E-08		Rps12	4.17E-46	-0.505400606	1	1	9.10E-42
							Mrpl52	0.005510759	0.324536947	1	1	1										Gm2000	1.66E-10	0.255234588	0.805	0.731	3.62E-06			Mrpl9	1.65E-12	-0.258449992	0.696	0.856	3.60E-08		Rpl30	8.21E-36	-0.514075518	1	1	1.79E-31
							Rps7	0.005510759	-0.250185669	1	1	1										Trap1a	1.93E-10	-0.264458352	0.701	0.876	4.21E-06			Kat2a	1.72E-12	0.259735133	0.719	0.655	3.75E-08		Dnajc21	2.25E-35	-0.518860907	0.919	0.997	4.91E-31
							Uqcrc2	0.005510759	-0.317328843	1	1	1										Fkbp8	1.96E-10	0.250079459	0.929	0.953	4.27E-06			Wdr76	2.68E-12	-0.275660299	0.716	0.887	5.84E-08		Usp7	4.68E-30	-0.520746871	0.784	0.981	1.02E-25
							Insig2	0.005513699	0.286176316	0.929	0.757	1										Hnrnpl	2.18E-10	0.264368741	0.838	0.829	4.76E-06			Eif4g3	3.31E-12	-0.253761753	0.635	0.846	7.22E-08		Ube2m	2.00E-27	-0.525805971	0.613	0.976	4.36E-23
							Tefm	0.005556079	0.267141764	0.786	0.486	1										Rps4x	2.30E-10	-0.289444227	0.987	1	5.03E-06			Ndufb4	4.34E-12	0.268926143	0.983	0.975	9.47E-08		Sap30l	1.00E-35	-0.535056792	0.559	0.946	2.18E-31
							Me1	0.005848832	0.356451975	0.5	0.162	1										Hnrnpk	2.45E-10	0.31055531	1	0.986	5.35E-06			Gm2000	4.83E-12	0.276899043	0.679	0.58	1.05E-07		mt-Atp6	7.96E-31	-0.539698831	1	1	1.74E-26
							Maoa	0.005870124	0.60233032	0.857	0.622	1										Ssr2	3.19E-10	0.342377813	0.968	0.986	6.96E-06			Naa15	6.23E-12	-0.25392526	0.666	0.85	1.36E-07		Rps24	4.44E-49	-0.554905897	1	1	9.69E-45
							Pum1	0.005874645	-0.361160141	0.857	0.973	1										Smc4	3.23E-10	-0.256754814	0.909	0.991	7.06E-06			mt-Co1	7.45E-12	-0.450267897	0.997	0.991	1.63E-07		Rock1	1.40E-27	-0.562029075	0.883	0.995	3.06E-23
							Cox17	0.005878003	0.386871748	1	0.946	1										Hmgn2	3.73E-10	0.306846141	0.87	0.935	8.15E-06			Btf3l4	8.27E-12	0.261397451	0.86	0.799	1.80E-07		Kif2a	6.24E-34	-0.562820835	0.694	0.94	1.36E-29
							Tmem59	0.005879123	0.395704411	1	1	1										Ccno	9.89E-10	0.334641239	0.877	0.935	2.16E-05			Slirp	8.89E-12	0.260048278	0.9	0.881	1.94E-07		Tpt1	5.64E-53	-0.567686606	1	1	1.23E-48
							Tfam	0.006013425	-0.369329322	0.643	0.838	1										Rnf10	1.04E-09	0.259535181	0.864	0.907	2.27E-05			Unc13c	1.16E-11	-0.283587418	0.508	0.743	2.53E-07		mt-Nd4	9.65E-28	-0.568034703	0.991	1	2.11E-23
							Map1lc3b	0.006060028	0.332414125	0.929	0.919	1										Taf7l	1.13E-09	0.652853792	0.636	0.495	2.46E-05			Rif1	1.16E-11	-0.369473012	0.789	0.865	2.54E-07		Supt16	9.98E-27	-0.572543616	0.91	0.997	2.18E-22
							9-Mar	0.006091944	-0.338562774	0.214	0.649	1										Tex264	1.14E-09	0.271231799	0.831	0.904	2.49E-05			Setx	1.23E-11	-0.258489952	0.548	0.727	2.68E-07		Cct2	1.75E-44	-0.581074017	1	1	3.82E-40
							Gsto1	0.006160111	0.270805289	0.571	0.189	1										Ooep	1.21E-09	-0.387546041	0.786	0.942	2.64E-05			Rab11b	1.37E-11	0.250967172	0.913	0.881	3.00E-07		Mbd2	8.72E-45	-0.617128436	0.351	0.932	1.90E-40
							Men1	0.006160111	0.267271617	0.571	0.189	1										Mrpl33	1.24E-09	0.274496049	0.994	0.986	2.70E-05			Taf7l	2.90E-11	0.277465964	0.943	0.937	6.34E-07		mt-Co3	5.12E-34	-0.618821168	1	1	1.12E-29
							Hspa2	0.006160287	0.699671176	0.5	0.135	1										Cks2	1.24E-09	0.26748636	0.994	1	2.71E-05			Wdr89	2.99E-11	0.261074497	0.839	0.815	6.52E-07		Rps10	1.48E-54	-0.622790104	1	1	3.24E-50
							BC004004	0.006171067	0.501378506	0.857	0.838	1										Trappc2	1.32E-09	0.345099729	0.896	0.937	2.87E-05			Zfp292	3.32E-11	-0.398004359	0.532	0.69	7.25E-07		mt-Nd4l	1.71E-30	-0.62895737	0.784	0.935	3.74E-26
							Gapdh	0.006246014	0.433283081	1	0.865	1										Eif4a2	1.41E-09	0.325657129	0.922	0.965	3.08E-05			Tmem258	3.52E-11	0.258388531	0.99	0.984	7.67E-07		Rab21	9.47E-41	-0.632939021	0.55	0.965	2.07E-36
							Srp19	0.006257769	0.30777534	1	0.892	1										Wdr89	2.02E-09	0.25178791	0.857	0.886	4.41E-05			Tsc22d3	4.29E-11	0.33150209	0.726	0.683	9.36E-07		Rpsa	7.70E-57	-0.683424352	1	1	1.68E-52
							Txnl1	0.006269536	-0.385350571	1	1	1										2810004N23Rik	3.00E-09	0.275551669	0.922	0.9	6.56E-05			Asna1	4.58E-11	0.264466179	0.853	0.818	9.99E-07		Cebpb	2.33E-42	-0.686723184	0.414	0.97	5.08E-38
							Gaa	0.00627693	0.333290574	0.714	0.378	1										Caprin2	3.21E-09	0.268109938	0.851	0.853	7.00E-05			Crebbp	5.84E-11	-0.254006555	0.739	0.881	1.28E-06		Csnk2a2	2.82E-46	-0.698316595	0.468	0.948	6.15E-42
							Gdi1	0.006292311	0.290251428	0.571	0.216	1										Pbdc1	4.37E-09	0.258437396	0.922	0.946	9.53E-05			Yeats4	6.35E-11	-0.255156854	0.756	0.862	1.38E-06		Eef1b2	1.71E-45	-0.71055652	1	1	3.74E-41
							Cic	0.006334793	-0.342791692	0.5	0.811	1										Epcam	4.54E-09	-0.25973316	0.799	0.963	9.90E-05			Wdr74	8.36E-11	0.253945573	0.779	0.759	1.82E-06		Kcmf1	4.71E-47	-0.716118995	0.73	0.986	1.03E-42
							Gm4763	0.006449372	0.340148771	0.643	0.27	1										Vkorc1	7.38E-09	0.289850953	1	0.998	0.000160959			Sec61g	8.41E-11	0.269612835	1	1	1.84E-06		Gkap1	1.68E-51	-0.728860306	0.982	1	3.66E-47
							Prkaca	0.006496233	0.253933331	0.714	0.324	1										Atpif1	8.10E-09	0.282973304	0.961	0.967	0.000176802			Ccdc88c	1.10E-10	-0.256995322	0.615	0.796	2.40E-06		Cul3	3.83E-46	-0.752066817	0.73	0.986	8.36E-42
							Ccdc92	0.006513959	0.374074691	0.929	0.568	1										Ankrd12	1.16E-08	-0.256458348	0.675	0.836	0.00025358			Herc1	2.83E-10	-0.280889194	0.615	0.784	6.17E-06		Hnrnpa0	2.18E-46	-0.789484056	0.523	0.959	4.76E-42
							Prkacb	0.006542709	-0.373829944	0.571	0.784	1										Ttn	2.22E-08	-0.466474814	0.377	0.584	0.00048453			Fmr1nb	3.16E-10	0.273260133	0.863	0.85	6.89E-06		Ybx3	5.06E-53	-1.034160723	0.703	0.997	1.10E-48
							Polr2b	0.006658413	-0.372359379	0.857	0.919	1										Eif3j1	2.36E-08	0.25376185	0.877	0.902	0.0005149			Crybg3	4.00E-10	-0.296849556	0.548	0.727	8.74E-06		mt-Nd3	5.72E-45	-1.17239374	0.874	0.981	1.25E-40
							Mael	0.006681897	0.334327814	1	0.946	1										Elavl2	2.37E-08	-0.257030469	0.922	0.977	0.000516529			Ptp4a1	7.18E-10	0.254362512	0.763	0.734	1.57E-05		mt-Nd2	6.66E-47	-1.360423691	0.946	1	1.45E-42
							Ddx5	0.006683134	0.395432599	1	1	1										Mrpl37	2.94E-08	0.250973505	0.753	0.741	0.000640558			Dlk1	7.27E-10	0.326633429	0.763	0.724	1.59E-05		mt-Co2	2.32E-49	-1.373745121	0.991	1	5.06E-45
							Ubxn1	0.006683134	-0.340928355	1	1	1										Snrnp25	3.51E-08	0.263072	0.831	0.862	0.000764976			Cenpf	1.49E-09	-0.26681879	0.849	0.903	3.25E-05
							Dusp11	0.006686434	0.321620861	0.857	0.622	1										Hist1h2ap	3.65E-08	0.498955618	0.571	0.486	0.000796492			mt-Nd5	1.54E-09	-0.42852865	0.776	0.828	3.36E-05
							Mon2	0.006749281	-0.339143893	0.429	0.73	1										Atp5b	3.77E-08	0.269670041	1	1	0.000822586			Ttn	2.00E-09	-0.571804198	0.194	0.401	4.38E-05
							Mex3d	0.006940355	-0.334423143	0.071	0.486	1										Tsc22d3	4.17E-08	0.389315372	0.682	0.57	0.000910197			Ypel3	2.65E-09	0.250671191	0.779	0.73	5.78E-05
							Lypla1	0.006970281	0.265478873	0.714	0.324	1										Psma1	4.72E-08	0.25680382	0.896	0.925	0.001030271			Atrx	4.55E-09	-0.304157302	0.555	0.724	9.92E-05
							Rpa2	0.007048514	0.379198753	0.857	0.865	1										Lgals7	5.72E-08	0.266915293	0.682	0.563	0.001247207			Tex101	5.13E-09	0.282586956	0.783	0.755	0.000111873
							Clptm1	0.007108109	0.295825955	1	0.892	1										Tex15	1.23E-07	-0.351848827	0.916	0.974	0.002677455			Chd4	7.44E-09	-0.303830237	0.672	0.871	0.000162408
							Pbrm1	0.007115902	-0.469394444	0.929	0.946	1										Ptp4a1	1.72E-07	0.276911889	0.786	0.801	0.003754411			Ankrd12	1.28E-08	-0.267013916	0.672	0.787	0.000280378
							Atp5k	0.0071198	0.342235678	1	0.946	1										Fbl	1.74E-07	0.260244179	0.981	0.991	0.003806383			Kmt2c	1.34E-08	-0.274314275	0.645	0.824	0.000291574
							Mea1	0.0071211	0.309372777	1	0.973	1										BC005561	4.94E-07	-0.260848606	0.643	0.794	0.01078451			Mov10l1	5.12E-08	-0.251241743	0.88	0.937	0.001116844
							Ndufa13	0.0071211	0.256888488	1	1	1										Syce3	7.20E-07	0.443048616	0.844	0.895	0.015715064			Akap9	5.58E-08	-0.25157649	0.672	0.799	0.001218711
							Rhno1	0.007205096	0.261801651	0.714	0.378	1										Pet100	1.23E-06	0.290369332	0.747	0.713	0.026856083			mt-Co3	3.87E-07	-0.334409964	0.99	0.994	0.008435732
							Ormdl1	0.007293748	-0.276401063	0.429	0.811	1										Bzw2	2.15E-06	0.277476948	0.74	0.771	0.046885293			Neb	5.01E-07	-0.323480436	0.585	0.721	0.01093421
							Gm6880	0.007303067	0.395947346	0.929	0.865	1										Tubb2b	2.72E-06	-0.278710163	0.727	0.914	0.059400688			mt-Nd4	1.08E-06	-0.330842381	0.96	0.956	0.023634233
							Ube2a	0.007348271	0.36419993	0.929	0.973	1										Tex101	2.77E-06	0.598853301	0.584	0.498	0.060556185			Ccdc73	5.39E-06	-0.255328279	0.906	0.937	0.117598441
							Creld2	0.007421835	0.299214153	0.929	0.784	1										Gm26917	2.87E-06	0.269315626	0.63	0.556	0.062570343			D10Wsu102e	1.84E-05	-0.49315266	0.856	0.918	0.401667842
							Dtnb	0.007436235	0.407305595	0.786	0.568	1										Tuba1b	5.22E-06	0.258557486	0.935	0.949	0.113983173			Marf1	2.50E-05	0.356666021	0.849	0.865	0.545509508
							Prss48	0.007507461	0.264375492	0.5	0.162	1										Rpl36a	5.23E-06	0.274798518	1	1	0.114188486			Insig1	0.001030575	0.338185239	0.823	0.856	1
							Setd5	0.007508447	-0.286530151	0.714	0.919	1										Mageb4	6.61E-06	0.286363145	0.929	0.942	0.144326726			Rpgrip1	0.602237566	0.276832864	0.656	0.806	1
							Kmt5a	0.007562532	-0.354725003	0.5	0.838	1										Akr1b3	1.06E-05	0.316824328	0.864	0.914	0.230698304
							Sarnp	0.007584661	0.29345115	1	0.973	1										Fmr1nb	1.26E-05	0.359512121	0.799	0.869	0.274949872
							Psmd6	0.007584661	-0.262604343	1	1	1										Fbxl5	3.59E-05	0.256910094	0.818	0.846	0.782935045
							Rdx	0.007584661	-0.400240696	1	1	1										H1f0	4.37E-05	0.486374273	0.701	0.752	0.952841481
							Hras	0.007597538	-0.355943596	0.643	0.865	1										Sp3os	5.93E-05	0.252555199	0.883	0.939	1
							Ablim1	0.007597538	-0.55012362	0.643	0.865	1										Pet2	0.000276349	0.295175894	0.494	0.407	1
							Hnrnpll	0.007618875	0.319946493	0.786	0.459	1										Gm364	0.000423101	0.271811628	0.799	0.815	1
							Cabin1	0.007670906	-0.423669511	0.571	0.838	1										Gm15389	0.00157258	-0.322542653	0.734	0.864	1
							Phf12	0.007704691	0.327355621	0.714	0.459	1										Hist1h1e	0.001790758	0.252488006	0.468	0.423	1
							Tmem9b	0.007756148	0.277298699	0.714	0.405	1										Id2	0.009543867	0.335003762	0.701	0.783	1
							Pgpep1	0.007802488	0.252051488	0.571	0.189	1										Ly6k	0.021746976	0.267550869	0.396	0.36	1
							Aldh7a1	0.007902706	0.318464663	0.857	0.595	1										Malat1	0.073079457	0.337258292	0.831	0.907	1
							Flot1	0.008024206	0.346587973	0.643	0.27	1										Nxf2	0.07539318	0.270043228	0.37	0.357	1
							Dars	0.008046484	0.405504923	0.857	0.919	1										Crabp1	0.084244071	0.271746036	0.747	0.836	1
							Eif4a2	0.008075097	0.526670416	1	1	1
							Eif3c	0.008075097	-0.291173476	1	0.973	1
							Ankra2	0.00813623	0.270781764	0.786	0.459	1
							4933416C03Rik	0.008161366	0.526272555	0.857	0.514	1
							Tmem175	0.008161366	0.267592783	0.857	0.514	1
							Eloa	0.008281626	0.306137219	0.857	0.649	1
							Rhox2a	0.008427768	0.457632717	0.786	0.541	1
							Arf2	0.008455885	0.257335012	0.929	0.514	1
							H13	0.008506005	0.306927648	0.786	0.432	1
							Mir9-3hg	0.008550276	0.265162051	0.571	0.216	1
							2410089E03Rik	0.008577858	-0.268348012	0.5	0.838	1
							Rpl7	0.008593732	-0.31829497	1	1	1
							Bend5	0.008701919	-0.253369404	0.429	0.676	1
							Pet2	0.008798856	0.567557398	0.857	0.757	1
							Tmem199	0.008819115	0.374560678	0.786	0.676	1
							Grwd1	0.008829051	0.322135256	0.714	0.378	1
							Parn	0.00892198	-0.253717034	0.286	0.703	1
							Mrpl19	0.009080821	0.264384736	0.786	0.432	1
							Tial1	0.009086924	0.428986455	0.857	0.892	1
							Tmem9	0.009111616	0.255066083	0.857	0.459	1
							Rpp21	0.009135649	0.345585419	1	0.919	1
							Ppp1cc	0.009140371	0.347482827	1	0.946	1
							Ywhaq	0.009141945	0.445106692	1	0.973	1
							Fyttd1	0.009141945	0.400193651	1	1	1
							Nif3l1	0.009164506	0.295909666	0.786	0.378	1
							Wdr20	0.009164506	-0.273065945	0.214	0.595	1
							Zfp704	0.009164506	-0.297094978	0.214	0.595	1
							Ykt6	0.009216763	0.295350413	0.571	0.243	1
							Tpx2	0.009387556	0.404076702	0.929	0.622	1
							Rab6a	0.009524202	0.348385144	1	0.757	1
							Hnrnpul1	0.009545721	0.261164962	0.929	0.703	1
							Cnot6l	0.009545721	-0.34445578	0.5	0.865	1
							Med29	0.009663512	-0.322436114	0.714	0.946	1
							Atxn2	0.009713358	-0.298278838	0.571	0.811	1
							Hprt	0.009714467	0.735093191	0.714	0.514	1
							Nubp2	0.009714467	0.29430204	0.857	0.459	1
							Rif1	0.009714568	-0.378868478	0.857	0.973	1
							Tomm70a	0.009721165	0.332519609	1	1	1
							Amz2	0.009838539	0.41477925	0.643	0.351	1
							Myo9a	0.009844536	-0.334095229	0.571	0.838	1
							4931406P16Rik	0.009861845	-0.325612322	0.5	0.811	1
							Vps13a	0.009963859	-0.463582034	0.786	0.919	1
							Rnf121	0.009981799	0.251857399	0.643	0.297	1
							Cpt2	0.010008147	0.35364562	0.714	0.459	1
							Slc9a3r1	0.010087541	0.30530263	0.714	0.432	1
							Ptpn11	0.010164925	-0.344966382	0.357	0.784	1
							Tktl1	0.010298349	0.617000696	0.857	0.919	1
							Pfn2	0.010315603	0.351479396	1	0.892	1
							Rps8	0.010332872	-0.332843286	1	1	1
							Ccdc88c	0.010451069	-0.377877655	0.214	0.595	1
							Saraf	0.010589608	0.366713129	0.929	0.865	1
							Adrm1	0.010649618	0.296242637	0.929	0.973	1
							Snx5	0.010682181	0.504631826	0.857	0.784	1
							Bub3	0.010682181	0.316689525	0.857	0.784	1
							Neb	0.010732931	-0.546410916	0.357	0.811	1
							Zfp84	0.010750056	0.254327648	0.357	0.081	1
							Lhx8	0.010762638	-0.439291005	0.571	0.919	1
							Zfp428	0.010791464	-0.287053455	0.286	0.703	1
							Gm11808	0.010942465	0.356872294	0.929	0.892	1
							Psma1	0.010971369	0.327716013	1	0.919	1
							Phb2	0.010976792	0.292853168	1	0.946	1
							Utp14a	0.01098096	-0.362934071	0.5	0.838	1
							Atp6v1b2	0.011124832	0.259896499	1	0.676	1
							Rimklb	0.011149402	0.372135448	0.929	0.649	1
							Styx	0.011152722	0.295648854	0.786	0.378	1
							Mob4	0.011159856	-0.429216775	0.643	0.919	1
							Acly	0.011197978	0.441278136	0.857	0.514	1
							Gm5128	0.011224298	0.383361181	0.786	0.459	1
							Mcm5	0.011247264	0.391174132	1	0.703	1
							Ip6k2	0.011375423	0.513151807	0.714	0.459	1
							Nsmce4a	0.011550974	0.342015991	0.786	0.541	1
							Cherp	0.011571913	0.41005859	0.786	0.568	1
							Malat1	0.011658048	0.897299789	1	0.946	1
							Ube2m	0.011658048	-0.334668203	0.857	1	1
							Eif3e	0.01165994	0.305371362	1	1	1
							Psma2	0.01165994	-0.259803248	1	1	1
							Chka	0.011742156	0.341191398	0.786	0.432	1
							Irf2bp2	0.011783678	-0.412615304	0.143	0.514	1
							Asns	0.012132585	0.29125232	0.429	0.135	1
							Rel	0.012185276	0.318958143	0.643	0.324	1
							Rbm14	0.012240976	0.375418359	0.643	0.27	1
							Eif2a	0.012283036	0.387916026	0.786	0.595	1
							Pmpcb	0.012339003	-0.321715825	0.786	0.946	1
							Fam103a1	0.012376555	0.295788778	1	0.946	1
							Pnrc1	0.012376555	-0.412180274	0.857	1	1
							Uchl1	0.012378533	-0.584125218	0.929	1	1
							Sema3c	0.01262041	-0.331157964	0	0.351	1
							Sirt2	0.012662812	0.390917285	0.857	0.568	1
							Gar1	0.012684887	-0.31419437	0.5	0.892	1
							Tef	0.012906051	0.286896329	0.714	0.459	1
							Rab11b	0.012962959	0.347322622	1	0.784	1
							Kctd5	0.013030522	0.266181814	0.786	0.405	1
							Nob1	0.013087328	0.278733709	0.714	0.378	1
							Ankrd24	0.013087328	-0.319140877	0.214	0.568	1
							D11Wsu47e	0.013108838	0.286580283	0.643	0.27	1
							Tra2b	0.013127813	0.481130409	1	0.919	1
							Riox2	0.013361032	-0.300565786	0.5	0.811	1
							Stx5a	0.013435007	0.326237614	0.643	0.378	1
							Cyhr1	0.013453673	-0.307132089	0.429	0.73	1
							Tmed4	0.013456149	0.321781716	0.929	0.865	1
							Ppp1r14b	0.01346378	-0.31701623	0.143	0.514	1
							Alas1	0.013541505	0.307960264	0.714	0.486	1
							Tceal9	0.013709292	0.442485094	0.786	0.486	1
							Acvr2b	0.0137149	-0.252952597	0.143	0.541	1
							Bin2	0.013743034	0.281094306	0.5	0.216	1
							Myl12b	0.013813653	-0.333605055	0.643	0.946	1
							Anxa7	0.013813653	-0.440946889	0.786	0.892	1
							Srsf6	0.013925701	0.366020524	1	0.919	1
							Malsu1	0.013932177	-0.329648639	1	0.946	1
							Srsf2	0.013934337	0.455333172	1	0.973	1
							Taf7l	0.013934337	0.379817599	1	0.973	1
							Snrpg	0.013934337	0.334678325	1	1	1
							Taf5	0.013934337	-0.320090449	1	1	1
							Dmc1	0.014044007	0.551857431	0.5	0.189	1
							Magea2	0.0141685	0.381384504	0.5	0.162	1
							Tgif1	0.014258188	0.29869514	0.357	0.081	1
							Larp4b	0.014347089	-0.353635923	0.929	0.973	1
							Gstk1	0.014402849	-0.28982679	0.286	0.649	1
							Pdk3	0.014605864	0.416315841	0.857	0.676	1
							Itpa	0.014688702	0.253375507	0.786	0.514	1
							Cd55	0.014748995	-0.582995122	0.357	0.703	1
							Cyb5r3	0.014772861	0.319825832	1	0.946	1
							Spa17	0.014834124	-0.339625361	0.5	0.919	1
							Dnm2	0.014859406	0.26914262	0.643	0.324	1
							Gm47448	0.015326158	-0.409053359	0.214	0.595	1
							Washc3	0.015528802	0.315263729	1	0.811	1
							Lmbr1	0.015536986	0.282826324	0.786	0.622	1
							Hormad1	0.015578054	0.661665141	1	0.838	1
							Brms1	0.015602583	0.264996819	0.857	0.486	1
							Svbp	0.015636773	0.343877403	1	0.892	1
							Gm364	0.015657936	0.41024988	1	0.946	1
							Pfn1	0.015657936	0.403907179	1	0.946	1
							Sdf4	0.015657936	0.29695652	1	0.946	1
							Adh5	0.016036135	-0.304905297	0.786	0.919	1
							Psmg4	0.01611772	-0.305802324	0.929	1	1
							Snrnp200	0.016189095	-0.291724007	0.714	0.838	1
							Sgsm3	0.016285671	0.303766343	0.5	0.189	1
							Gpaa1	0.016298505	0.268279252	0.929	0.784	1
							Dynlt1c	0.016492066	0.331097051	0.5	0.162	1
							Vamp7	0.016522942	0.359145655	0.714	0.459	1
							Xiap	0.016566121	-0.251475134	0.357	0.676	1
							Timm17b	0.016581971	0.374021793	1	0.919	1
							Mark3	0.016581971	-0.277166909	0.857	0.973	1
							Pbdc1	0.016589329	0.336448819	1	0.946	1
							Dynll2	0.016589329	0.306358059	1	0.946	1
							Eid1	0.016623083	-0.352524148	0.357	0.703	1
							Rbm46	0.016846561	-0.480118148	0.571	0.838	1
							Nptx2	0.016852756	0.299055435	0.714	0.378	1
							Mrpl44	0.016987947	0.284775371	0.929	0.865	1
							Inca1	0.017123092	0.376105423	0.857	0.514	1
							Gpx1	0.017125297	0.287946667	0.357	0.081	1
							Trmt1	0.017134296	0.32632333	0.786	0.676	1
							Usp4	0.01728353	0.274527406	0.786	0.459	1
							Dpep3	0.017520123	0.447306627	0.5	0.189	1
							Anapc11	0.017561359	0.369708905	0.857	0.973	1
							Trim28	0.017561359	0.350521528	1	0.919	1
							Exosc7	0.017561359	-0.271755446	0.857	0.973	1
							Myl6	0.017569029	0.362861916	1	0.946	1
							Calm2	0.017571586	0.571328907	1	1	1
							Ndufb6	0.017571586	0.397509408	1	1	1
							Ndufa8	0.017571586	0.257845847	1	1	1
							Dnajb1	0.0176423	0.300719945	0.857	0.703	1
							Gstm5	0.017730487	0.267355016	0.714	0.324	1
							Micu2	0.017846157	-0.296684313	0.571	0.838	1
							Cdk4	0.017915474	0.25544153	0.929	0.649	1
							Nufip2	0.017915474	-0.279114044	0.643	0.757	1
							Elp5	0.01798898	0.255960571	0.929	0.865	1
							Fbxo8	0.01799311	0.294532522	0.714	0.514	1
							Dusp7	0.01799311	-0.33963415	0.286	0.676	1
							Mrpl10	0.018534854	0.278112984	0.786	0.486	1
							Impdh2	0.018575114	0.31550541	1	0.892	1
							Bud31	0.018591091	0.257580446	1	0.919	1
							Cdv3	0.018599082	-0.287280613	0.857	1	1
							Hnrnpf	0.018601746	-0.261083928	1	1	1
							Rpl9	0.018601746	-0.285745524	1	1	1
							Zfp292	0.018689894	-0.336480882	0.643	0.865	1
							Brdt	0.018695352	0.313436276	0.857	0.541	1
							Gpatch8	0.018703133	-0.311947331	0.357	0.703	1
							Nkiras2	0.018868741	0.27050184	0.714	0.432	1
							Wdtc1	0.018882766	0.347137731	0.643	0.351	1
							Srsf1	0.018908546	0.310989953	0.929	0.811	1
							Iqcb1	0.019041309	0.368227805	0.929	0.865	1
							Tigd2	0.01906975	0.313199505	0.714	0.378	1
							Atg4b	0.019077835	0.274805326	0.929	0.73	1
							2510039O18Rik	0.019077835	0.272735272	0.857	0.757	1
							1700013H16Rik	0.019228765	0.60968397	0.857	0.784	1
							Lztfl1	0.019228765	-0.284253717	0.714	0.838	1
							Spc25	0.019352603	0.530174086	0.929	0.784	1
							Dmwd	0.019450182	-0.297390373	0.143	0.486	1
							Tecr	0.0194519	0.288153612	1	0.784	1
							Nfyc	0.0194519	0.274800266	1	0.784	1
							Cstf2	0.019529268	0.258299454	0.929	0.838	1
							Sap30l	0.019529268	-0.364745294	0.857	0.865	1
							Slc25a31	0.019684368	0.41299391	1	1	1
							Atp5b	0.019684368	0.330966736	1	1	1
							Hspa5	0.019684368	0.315554544	1	1	1
							Kdm3a	0.019687763	0.260393356	0.429	0.135	1
							Stradb	0.019812642	0.25725024	0.857	0.541	1
							Jagn1	0.020190229	0.317697421	0.929	0.73	1
							Itgb3bp	0.020190229	-0.364219913	0.643	0.838	1
							Tamm41	0.020200086	0.280823644	0.714	0.405	1
							Poldip2	0.020243196	0.296907593	0.929	0.973	1
							Ivns1abp	0.02024663	0.310265249	0.857	0.459	1
							Cecr2	0.020347373	-0.3499645	0.714	0.838	1
							Clspn	0.020604402	0.341577472	0.5	0.162	1
							Ndufv3	0.020660191	0.341172386	1	0.811	1
							Thap7	0.020660191	0.292306501	0.929	0.838	1
							Eif1ax	0.020763909	-0.357047828	0.714	0.973	1
							Rnaset2a	0.020792755	0.525555421	1	0.892	1
							Edrf1	0.020987797	-0.301504404	0.429	0.703	1
							Dennd1b	0.020987797	-0.332124208	0.429	0.703	1
							Dppa3	0.021257598	-1.105161961	0.643	0.757	1
							Fundc1	0.02126905	0.325742806	0.714	0.432	1
							Synrg	0.02126905	-0.269677026	0.286	0.595	1
							Zfp444	0.021385177	0.281553305	0.643	0.351	1
							Fbxl17	0.021451002	-0.349377296	0.286	0.568	1
							Hexa	0.021539771	0.28694425	0.571	0.297	1
							Zmat2	0.021656475	0.274192809	0.929	0.784	1
							Gsdme	0.021728671	0.30500825	0.5	0.189	1
							Rabep1	0.021910709	-0.313261523	0.714	0.946	1
							1700018B24Rik	0.021955689	0.295312385	0.857	0.919	1
							U2af2	0.021988411	0.268408442	0.929	0.568	1
							Ifi203	0.021988448	0.389484455	0.143	0	1
							Tdp2	0.022012712	0.377324268	1	0.946	1
							Calr	0.022015715	0.327571967	1	1	1
							Fam72a	0.022200778	0.251745765	0.357	0.108	1
							Mcm3ap	0.022208496	-0.255368187	0.357	0.676	1
							Gc	0.022236685	0.828096854	0.571	0.27	1
							1810037I17Rik	0.02252772	0.300867841	0.929	0.865	1
							U2surp	0.02252772	-0.292356753	0.929	0.865	1
							Snx12	0.022585848	0.277489368	0.929	0.73	1
							Setd1a	0.02274132	-0.257855038	0.214	0.514	1
							Adsl	0.022742573	0.305830306	0.714	0.514	1
							Stip1	0.022755926	0.58137133	1	0.73	1
							Sar1a	0.023094365	0.448774698	1	0.811	1
							Suclg1	0.023159778	-0.271646622	0.714	0.946	1
							Tmf1	0.023206543	0.35278654	1	0.865	1
							Yipf4	0.023256463	0.293403446	1	0.919	1
							Dbi	0.023265827	0.262621451	1	0.946	1
							Rab1a	0.023395441	0.312646935	0.929	0.757	1
							Sdcbp	0.023518826	0.305130724	0.786	0.514	1
							Eri1	0.023521433	0.360656448	0.857	0.541	1
							Rmdn3	0.023706951	0.260630021	0.857	0.622	1
							Cox6b2	0.023776439	0.504339498	0.929	0.649	1
							Ccdc73	0.023915288	-0.469084836	0.929	0.973	1
							Mgp	0.024123764	0.251303294	0.357	0.108	1
							Scaf1	0.024156458	0.266312121	0.714	0.405	1
							Rbm27	0.024518814	0.292836141	0.929	0.892	1
							Acat1	0.024746068	-0.453138815	0.5	0.838	1
							Hsd17b4	0.024895734	-0.279961155	0.429	0.649	1
							2310022A10Rik	0.025031238	0.26726439	0.571	0.324	1
							Fam53a	0.025130224	-0.271181234	0.5	0.811	1
							Xlr	0.025149203	0.341830046	0.929	0.865	1
							Mink1	0.025367226	0.265856146	0.714	0.432	1
							Sesn3	0.025477196	0.250302359	0.857	0.568	1
							Nxf1	0.025559084	0.350228062	0.929	0.784	1
							Zfand5	0.025679806	0.303972226	1	0.784	1
							Pigp	0.02595888	0.272387743	1	0.946	1
							Hnrnpa2b1	0.025962248	0.551019988	1	1	1
							Mrps24	0.025962248	-0.292333159	1	1	1
							Dync1h1	0.02601117	-0.258108926	0.5	0.73	1
							Phb	0.026144343	0.361234779	0.857	0.703	1
							Tc2n	0.026189534	0.271789191	0.357	0.108	1
							Wwc2	0.026316382	-0.309538602	0.357	0.73	1
							Trim52	0.026502929	0.342015746	0.714	0.459	1
							Paip2b	0.026626287	0.291092015	0.643	0.297	1
							1600020E01Rik	0.02726743	0.297790479	0.643	0.351	1
							Atf6b	0.027285869	0.327537209	0.857	0.676	1
							Eef1a1	0.027407176	-0.286392368	1	1	1
							Eif3a	0.027407176	-0.293953347	1	1	1
							Lrpap1	0.027569647	0.351322516	0.929	0.757	1
							Mef2d	0.027685714	-0.298314217	0.5	0.703	1
							Selenot	0.027818423	0.295090684	0.786	0.568	1
							Ly6k	0.027856646	0.940718481	0.929	0.811	1
							Tsga8	0.027878605	-0.804770823	0.357	0.703	1
							Sypl	0.028030735	0.330271819	0.929	0.865	1
							Dhx36	0.028030735	-0.304559238	0.643	0.973	1
							Pcgf6	0.028030735	-0.322619615	0.786	0.919	1
							Wrnip1	0.02845769	0.256050664	0.857	0.568	1
							Trim71	0.028464521	-0.2779757	0.286	0.595	1
							Xlr5a	0.028486732	0.334389058	0.929	0.784	1
							Xlr4b	0.028654023	0.316203379	0.786	0.757	1
							Trip4	0.028662005	0.289844561	0.857	0.514	1
							Parp12	0.02869105	0.276139291	0.5	0.189	1
							Zcchc7	0.028718057	-0.3351957	0.714	0.919	1
							Epb41l2	0.028718057	-0.337790882	0.786	0.892	1
							Ppfibp2	0.028767878	-0.307573219	0.286	0.568	1
							Akap11	0.028906451	-0.295507149	0.929	0.946	1
							Chmp4b	0.02892096	0.284393352	1	0.973	1
							Cct4	0.02892096	-0.258285546	0.929	1	1
							Rpl7a	0.02892096	-0.260898551	1	1	1
							Errfi1	0.028939743	0.280572801	0.643	0.351	1
							Oip5	0.029497042	0.290603269	0.571	0.297	1
							Pcmtd1	0.029497042	-0.262924064	0.143	0.459	1
							Lap3	0.029575281	-0.293940567	0.786	0.919	1
							Prpf31	0.029682256	0.264930002	0.857	0.757	1
							Kmt2b	0.029692848	-0.254595507	0.286	0.622	1
							Cltc	0.030237208	-0.307977651	0.643	0.811	1
							Hmgb2	0.030506174	0.535835357	1	1	1
							Rad50	0.030506174	-0.312909366	1	1	1
							Hdac3	0.030837215	0.252131154	0.857	0.432	1
							Atp6ap1	0.031123948	0.35924455	0.714	0.541	1
							Fam178b	0.031882222	0.272150199	0.714	0.432	1
							Csnk1g2	0.032079311	-0.310962105	0.571	0.784	1
							Arhgap5	0.032149863	-0.294617377	0.929	0.946	1
							Mrpl57	0.032161554	0.292314918	1	0.946	1
							Nop58	0.032165451	-0.330601539	0.929	1	1
							Fopnl	0.032247146	0.263654143	0.714	0.405	1
							Gmcl1	0.032441384	0.271421602	0.929	0.676	1
							Tti2	0.032478232	0.351261701	0.5	0.27	1
							4930550L24Rik	0.032596228	0.493764728	0.714	0.486	1
							Ebpl	0.032752684	0.258876693	1	0.676	1
							Ryk	0.032875431	-0.278350559	0.357	0.676	1
							Commd6	0.032907525	0.286232628	0.857	0.622	1
							Dnajb9	0.033820772	0.307115934	0.929	0.892	1
							H2-D1	0.034440485	0.719332142	0.643	0.514	1
							Fancl	0.034496338	0.323270832	0.643	0.351	1
							Psma8	0.03452747	0.250439397	0.857	0.73	1
							Arid5b	0.034706144	-0.55859974	0.571	0.73	1
							Rad51ap2	0.034992469	0.554139171	0.429	0.189	1
							Cnppd1	0.035087757	0.33390762	0.643	0.432	1
							Riok1	0.035087757	0.256687139	0.643	0.432	1
							Stard7	0.03521479	0.293400499	0.786	0.676	1
							Cdk2ap2	0.035445254	0.409194152	0.929	0.703	1
							Wdr36	0.035483205	-0.306295008	0.857	0.865	1
							G6pc3	0.035645867	0.282958917	0.714	0.432	1
							Pole3	0.03570028	0.255014842	1	0.919	1
							Nsa2	0.035712815	-0.292302559	0.857	1	1
							Serinc1	0.035716993	0.352304667	1	0.973	1
							Hsf2bp	0.035955909	0.36234705	0.929	0.757	1
							Htra1	0.035998419	-0.302636709	0.071	0.378	1
							Dnajc3	0.036049942	0.432510035	0.857	0.703	1
							Otud4	0.036049942	-0.259002878	0.571	0.811	1
							Fam98b	0.036080917	0.264623236	0.714	0.405	1
							Msl3	0.036359379	0.253750095	0.571	0.351	1
							Rnf181	0.036373168	0.302142142	0.786	0.459	1
							Asb3	0.036385254	0.254344377	0.643	0.405	1
							Ralgps2	0.036485848	-0.274347864	0.429	0.703	1
							Mrps10	0.03666689	0.288397447	0.857	0.757	1
							Tle6	0.037251999	-0.361909374	0.429	0.73	1
							Rnf130	0.037343387	-0.268278532	0.643	0.811	1
							Rhox1	0.037372906	0.319635679	1	0.811	1
							Scaf11	0.037597502	-0.349181826	0.929	0.946	1
							Eea1	0.037614793	-0.320507851	0.929	1	1
							Rnf41	0.037941034	0.294767686	0.786	0.622	1
							Aak1	0.038478022	0.255355981	0.643	0.405	1
							Rfc5	0.038556237	0.321855662	0.857	0.622	1
							Hnrnpl	0.038556237	0.272993151	0.857	0.622	1
							Ptp4a1	0.038577584	0.300040418	0.786	0.486	1
							Mrm3	0.038606437	0.261223397	0.786	0.541	1
							Gabra3	0.038644534	-0.269639188	0.357	0.676	1
							4921524J17Rik	0.038861869	-0.282310874	0.714	0.838	1
							Tslrn1	0.038909399	0.499867949	0.5	0.243	1
							Pink1	0.039112707	0.264916669	0.5	0.27	1
							Letm2	0.039205361	0.322165401	0.643	0.432	1
							Rad23b	0.039508345	0.373200548	1	0.865	1
							Spast	0.039508345	-0.260557723	0.786	0.946	1
							Gng5	0.039597723	-0.283155325	1	1	1
							Magoh	0.039597723	-0.286458324	0.929	1	1
							Pxmp2	0.039782112	0.333410359	0.643	0.459	1
							Znhit6	0.039995255	-0.271099855	0.571	0.811	1
							Snapc1	0.040463029	0.296350718	0.929	0.865	1
							Smu1	0.041115191	0.308864951	1	0.757	1
							Ccnb2	0.041115191	0.257665955	1	0.757	1
							Pak2	0.041410167	-0.321172427	0.786	0.892	1
							Mat2a	0.04157631	0.36650498	1	0.865	1
							Fbxw7	0.041650201	-0.28067027	0.857	0.973	1
							Capzb	0.041664059	0.252591739	1	0.946	1
							Ube2e3	0.041668679	0.292126065	0.929	1	1
							Rpl39	0.041668679	-0.392256384	1	1	1
							Lgals7	0.042105507	-0.334150442	0.5	0.73	1
							Cdc20	0.042435949	0.564840462	0.643	0.486	1
							Lmo7	0.042698468	-0.294215677	0.071	0.351	1
							Uhrf2	0.042718554	0.292382007	0.857	0.541	1
							Mov10l1	0.042733389	-0.381900095	1	1	1
							Tubb2b	0.042845114	-0.348715527	0.143	0.486	1
							Arid2	0.042951032	-0.266313189	0.429	0.649	1
							Zfp317	0.043182529	0.257291261	0.571	0.351	1
							Bex4	0.043345864	0.268848425	0.857	0.649	1
							Dync1i2	0.043563578	-0.271754	0.714	0.919	1
							Atg12	0.043563578	-0.296537017	0.786	0.892	1
							Larp7	0.04477699	-0.266762714	0.786	0.919	1
							Phf23	0.044986779	0.270585858	0.786	0.568	1
							Dusp12	0.045008612	-0.310526845	0.429	0.784	1
							Abhd16a	0.045379871	0.358977348	0.643	0.405	1
							Peli1	0.045610259	0.327578766	0.857	0.649	1
							Hmgcr	0.045610259	-0.272989936	0.5	0.784	1
							Acsl3	0.045685036	0.28533301	0.571	0.351	1
							Maged1	0.046086491	0.347394109	1	1	1
							Set	0.046086491	-0.285242839	0.929	1	1
							Tpr	0.046086491	-0.290517384	1	1	1
							Fbxo7	0.046596523	0.274896907	0.786	0.73	1
							Spats2	0.046990217	-0.251384743	0.429	0.892	1
							Trap1	0.047075556	0.270639148	0.929	0.865	1
							Ube2h	0.047323862	-0.313470513	0.643	0.838	1
							Nfe2l2	0.047456099	0.278002842	0.571	0.297	1
							Tmem251	0.04747873	-0.267538577	0.286	0.649	1
							Kdm1b	0.047973521	-0.323506813	0.571	0.757	1
							Ppip5k2	0.048009694	-0.282030616	0.214	0.459	1
							Mrpl32	0.048439374	-0.26401436	0.929	1	1
							H2afy	0.048439374	-0.277099698	1	1	1
							Pdcl3	0.048991413	-0.267595421	0.643	0.784	1
							Arrdc3	0.049542585	0.35242168	0.357	0.135	1
							Iws1	0.05026419	-0.297412092	0.714	0.865	1
							Get4	0.050639612	0.262461813	0.786	0.757	1
							Ranbp2	0.050639612	-0.274240981	0.643	0.811	1
							Ckap2l	0.050782216	0.273478798	0.571	0.324	1
							Gnb1	0.05087137	0.359142917	1	0.919	1
							Mpp6	0.05088709	-0.263627948	0.857	1	1
							Rps27l	0.05089233	0.278975109	1	1	1
							Tex15	0.05089233	-0.396265371	1	1	1
							Cdkn1c	0.051059933	0.579314224	0.786	0.649	1
							Drosha	0.052262556	-0.299628543	0.643	0.838	1
							Akap8l	0.052787714	0.436948427	0.714	0.541	1
							Nobox	0.053009451	-0.267788543	0.429	0.811	1
							Snrpc	0.053448478	0.267391144	1	0.973	1
							Ooep	0.053938623	-0.491968182	0.214	0.514	1
							Slc27a1	0.053999807	0.302981343	0.714	0.568	1
							Npat	0.053999807	0.297491533	0.714	0.568	1
							Ube2e2	0.054095977	0.284284682	0.643	0.432	1
							Rps27rt	0.054574439	0.311965653	0.929	0.865	1
							Ccni	0.054574439	-0.26999483	0.786	0.919	1
							Brix1	0.054711424	-0.283600894	0.786	0.973	1
							Rad17	0.055194283	-0.305193678	0.571	0.892	1
							2300009A05Rik	0.055371201	0.355603757	0.786	0.541	1
							Cib1	0.055444063	-0.256236048	0.5	0.946	1
							Herc1	0.055444063	-0.361970196	0.786	0.838	1
							Ppp1ca	0.056105409	0.28294172	1	0.946	1
							Spint2	0.056110972	0.377877027	1	1	1
							Ubc	0.056110972	0.323874104	1	1	1
							mt-Nd1	0.056110972	-0.293682963	1	1	1
							U2af1	0.056110972	-0.304519802	1	0.973	1
							C1qtnf4	0.056230862	0.284313384	0.571	0.297	1
							Cdc37l1	0.056237681	0.354555895	0.857	0.757	1
							Nrbf2	0.056378662	-0.264993953	0.5	0.757	1
							Cmc1	0.0567715	-0.261074282	0.429	0.676	1
							Vps36	0.057905628	0.260906172	0.714	0.595	1
							Wbp2	0.058036157	0.29073669	0.643	0.486	1
							Cdkn2d	0.058165414	0.324462934	0.643	0.378	1
							Srrt	0.058201142	0.35122516	0.786	0.541	1
							Rhox7b	0.058372857	0.45980785	0.643	0.568	1
							Atxn7l3b	0.058682631	0.285259799	1	0.838	1
							Fam216a	0.058860096	0.377854297	0.857	0.973	1
							Tmem14c	0.058860096	-0.595923969	0.929	0.946	1
							Emc7	0.058883	0.321439234	1	0.973	1
							Gm13830	0.059126606	0.290715191	0.5	0.216	1
							Sbds	0.059714239	0.256517897	0.571	0.405	1
							Pramef12	0.059889751	-0.286952879	0.286	0.676	1
							Zfand6	0.060253014	0.279902654	0.929	0.919	1
							Sohlh1	0.060473353	-0.458050697	0.643	0.838	1
							Tuba1b	0.06082872	0.447442262	0.786	0.568	1
							BC005561	0.061561635	-0.450509658	0.857	0.892	1
							Wbp4	0.061744221	0.323776174	1	0.919	1
							Ctsd	0.061767785	0.334208206	0.929	1	1
							N6amt1	0.062098821	0.285321132	0.429	0.216	1
							Mrpl36	0.062567578	0.259230579	0.786	0.73	1
							Cox8c	0.062641023	0.260681909	0.5	0.27	1
							Lrrc28	0.063396388	0.267262761	0.571	0.351	1
							Apopt1	0.06377146	-0.264441969	0.286	0.595	1
							Ncoa4	0.064042091	0.255981529	0.929	0.784	1
							Usp16	0.064708003	-0.267393947	0.857	0.946	1
							Dynlrb1	0.064762517	0.26824502	1	0.946	1
							Ube2b	0.064768574	0.313219934	1	0.973	1
							Tfrc	0.064957274	-0.288876709	0.429	0.73	1
							Tagap1	0.065460448	0.323392556	0.357	0.135	1
							Dnpep	0.065797831	0.281445241	0.929	0.811	1
							Reg2	0.06627304	0.673752466	0.5	0.27	1
							Gosr2	0.066628589	0.264932731	0.786	0.703	1
							Ift43	0.067557586	-0.289728728	0.571	0.757	1
							4932438A13Rik	0.067764156	-0.315290657	0.857	0.919	1
							Trappc2	0.067882419	0.374099752	1	0.946	1
							Mrpl24	0.067888644	0.250333137	1	1	1
							Ubl4a	0.068157115	0.299270173	0.857	0.568	1
							Pard3	0.068806801	-0.280360037	0.571	0.811	1
							Pitpna	0.069156036	0.250784931	0.786	0.622	1
							Ninj1	0.069304435	-0.375020392	0.714	0.784	1
							Cgrrf1	0.069725719	0.261734448	0.786	0.784	1
							Tox4	0.069867429	0.361845724	0.643	0.432	1
							Mum1l1	0.070214981	0.386920944	0.571	0.378	1
							Coq8a	0.070773328	-0.320579008	0.714	0.919	1
							Tmx1	0.071019156	0.262093316	0.714	0.541	1
							Srsf7	0.071124897	0.309740046	1	0.946	1
							Srprb	0.071633655	0.27354852	0.571	0.459	1
							Ppm1g	0.071718537	0.313274055	0.786	0.649	1
							Hnrnpa3	0.072572915	0.397601993	0.929	0.865	1
							Rad51	0.07341743	0.252517533	0.857	0.784	1
							Ung	0.073424814	-0.269718369	0.571	0.73	1
							Rdm1	0.074251513	0.801618289	0.429	0.216	1
							Siah1b	0.074499828	0.302133288	1	0.973	1
							Fbxw5	0.074635666	0.2737277	0.643	0.514	1
							Esco2	0.074936592	0.345488662	0.857	0.676	1
							Maged2	0.07554842	0.270646702	0.857	0.703	1
							Cenpv	0.075674071	-0.292333823	0.643	0.919	1
							Pin1	0.076225698	0.253431591	0.929	0.973	1
							Pradc1	0.076265238	0.295793805	0.571	0.514	1
							Evl	0.076695751	-0.288133741	0.643	0.757	1
							Neto2	0.077164198	0.375912112	0.571	0.405	1
							Atp13a3	0.077164198	-0.272616903	0.286	0.514	1
							Cfdp1	0.077189878	-0.251699724	0.714	0.865	1
							Timm50	0.077189878	-0.266698067	0.714	0.865	1
							Marcksl1	0.077761978	0.856301567	0.857	0.892	1
							Tmem248	0.077764311	0.314244541	0.786	0.676	1
							Pold3	0.077970657	0.255489274	1	0.919	1
							Htatsf1	0.077970657	-0.302079745	0.929	0.946	1
							Llph	0.077990853	0.266788291	1	0.946	1
							Uqcrc1	0.077997585	0.257768525	1	1	1
							Bpnt1	0.078138802	0.304754526	0.714	0.541	1
							Cpsf2	0.078314337	0.267570761	0.714	0.486	1
							Wdfy3	0.078376355	0.274975928	0.357	0.162	1
							2810474O19Rik	0.079623296	-0.366280057	0.5	0.73	1
							Jrkl	0.07998783	0.258690816	0.357	0.135	1
							Smc5	0.080109658	0.26934816	0.929	0.73	1
							Ccdc12	0.080315069	0.259050383	0.786	0.703	1
							Atg5	0.080799724	-0.254690951	0.714	0.865	1
							Ddah1	0.080870007	-0.374200992	0.071	0.297	1
							Cspp1	0.081048167	0.256126151	1	0.784	1
							M6pr	0.081241407	0.285622414	0.929	0.838	1
							Timm9	0.081241407	-0.273196388	0.929	0.838	1
							Zfp664	0.081621	-0.260143127	1	0.946	1
							Pnpla2	0.08257474	0.272152382	0.5	0.27	1
							Rbm18	0.082819706	-0.315330447	0.643	0.784	1
							Abca5	0.083385006	0.254927902	0.429	0.216	1
							Rcc2	0.084883919	-0.263611335	0.429	0.703	1
							Egln2	0.08499809	-0.257939464	0.786	0.892	1
							Micu3	0.085281962	-0.404734613	0.643	0.811	1
							Tmsb10	0.085387051	0.464357634	1	0.946	1
							Aldh1a2	0.08595148	0.265361563	0.286	0.108	1
							H1fx	0.085973362	-0.393651293	0.357	0.595	1
							Dgkh	0.087117871	-0.353174425	0.286	0.568	1
							Srp72	0.087322088	-0.278463727	0.929	0.973	1
							Cystm1	0.088281854	0.287520732	0.429	0.216	1
							Top2a	0.088417058	0.294199531	0.571	0.432	1
							Mtmr14	0.089154759	-0.273469597	0.857	0.919	1
							Cops7a	0.089299598	0.302707694	1	1	1
							Actg1	0.089299598	0.260365881	1	1	1
							Ubn2	0.090096395	-0.309690281	0.643	0.865	1
							Adad1	0.090319739	0.303958135	0.571	0.378	1
							Terf1	0.091716476	0.348184182	0.857	0.757	1
							Cmss1	0.092012078	0.294042628	0.786	0.703	1
							Tmx4	0.092458099	-0.265004321	0.857	0.811	1
							Babam2	0.092892277	0.302664692	0.429	0.27	1
							Gabrr1	0.092892277	0.252345099	0.5	0.243	1
							Bbx	0.093318024	-0.355838839	0.929	0.946	1
							H3f3b	0.09334767	0.306117926	1	1	1
							Hnrnpu	0.09334767	-0.26129204	1	1	1
							Wdr34	0.093940058	0.271350578	0.571	0.405	1
							Slc35f5	0.09412778	0.253657237	0.571	0.486	1
							Xlr5c	0.094438857	0.400536577	0.643	0.486	1
							Hadha	0.094796444	-0.280297842	0.643	0.919	1
							Prss50	0.095240029	0.464914802	0.5	0.297	1
							Bpgm	0.09537203	-0.342210234	0.714	0.784	1
							Naa38	0.096904788	0.317861582	1	0.784	1
							Map4k4	0.096904788	-0.270769863	0.714	0.892	1
							Scml2	0.098429159	0.339486246	0.929	0.757	1
							Apip	0.098499224	-0.27924022	0.429	0.649	1
							Osbpl9	0.098834551	0.367393705	0.643	0.541	1
							Mzt1	0.100543792	0.259130126	0.786	0.703	1
							Gm49035	0.101371949	-0.254120739	0.143	0.351	1
							Bclaf1	0.101450955	-0.331271939	0.857	0.865	1
							Akap9	0.101450955	-0.342296309	0.857	0.865	1
							Ethe1	0.103559804	0.269883418	0.643	0.486	1
							Mcph1	0.106384542	0.270952974	0.786	0.568	1
							Jund	0.106494556	0.333522516	0.857	0.649	1
							Cdkl2	0.10765294	0.255926056	0.643	0.432	1
							Fbxl3	0.108160578	-0.254912043	0.5	0.595	1
							Cnpy1	0.10885244	-0.276900636	0.143	0.378	1
							Pecam1	0.110428841	0.337166681	0.571	0.351	1
							Dnajc8	0.110951667	0.257130204	1	0.892	1
							Reln	0.11278131	-0.257363583	0.143	0.351	1
							Shcbp1l	0.113163142	-0.378679872	0.357	0.568	1
							Mrps18a	0.113336159	0.270180471	0.929	0.919	1
							Hes1	0.113522208	-0.354655344	0.286	0.514	1
							Cadm1	0.113900645	0.352361337	0.5	0.324	1
							Ppp1r10	0.115381437	-0.26459764	0.786	0.892	1
							Dgat1	0.115601835	0.292198808	0.714	0.514	1
							Zfp207	0.115678378	0.282426653	1	0.865	1
							Hmgn2	0.11760963	0.513858821	0.929	0.811	1
							Ap1m1	0.1184076	0.28957898	0.857	0.73	1
							Csnk1e	0.119539109	-0.418842187	0.429	0.676	1
							Ewsr1	0.12064829	0.338959373	1	0.865	1
							Gm11985	0.121962958	-0.314675262	0.643	0.865	1
							Commd1	0.123067788	0.295091022	0.929	0.865	1
							Trim23	0.123352371	0.261418838	0.643	0.432	1
							Ddias	0.126639379	0.473267147	0.714	0.459	1
							Aktip	0.127159233	0.327075409	0.786	0.811	1
							Sgo1	0.127986318	0.267601719	0.429	0.297	1
							Hnrnpk	0.128578886	0.443587843	0.929	0.973	1
							Zfp622	0.131087993	0.30646004	0.929	0.892	1
							Ino80b	0.132275181	0.256848059	0.571	0.514	1
							Spdya	0.133175245	0.292448467	0.643	0.378	1
							Ap1s2	0.133175245	0.263746941	0.643	0.378	1
							Yif1b	0.133499678	0.266792256	0.714	0.757	1
							Rps6ka6	0.137911111	0.28737982	0.5	0.324	1
							Kif22	0.137952394	0.273405998	0.5	0.405	1
							Pcbp1	0.138793839	-0.25860822	0.786	0.865	1
							Atr	0.140404957	-0.310667519	0.714	0.811	1
							Rhox13	0.140676592	0.506276959	0.714	0.649	1
							Alg5	0.140842034	0.254975111	0.643	0.514	1
							Sgf29	0.146565998	0.30354811	0.786	0.622	1
							Plekhf2	0.147249792	0.259033776	0.643	0.459	1
							Jpt1	0.148043727	0.276223098	0.857	0.919	1
							Mrps36	0.1489879	0.336716954	0.786	0.676	1
							Nxf2	0.151565502	0.308494265	0.857	0.73	1
							Abhd12	0.152642188	0.337128574	0.643	0.676	1
							Emd	0.152698946	0.258949669	0.714	0.838	1
							Krcc1	0.158348874	0.500404371	0.786	0.784	1
							Fkbp8	0.159298763	0.258157302	0.857	0.811	1
							Tdrkh	0.160246452	0.306727196	0.929	0.892	1
							Setx	0.160868519	0.297838309	0.786	0.757	1
							Glt8d1	0.163308957	0.334197046	0.857	0.703	1
							Gadd45b	0.165646561	0.258878115	0.5	0.324	1
							Mdk	0.166899096	0.306041947	0.643	0.432	1
							Tuba3b	0.168584711	0.342645106	0.214	0.081	1
							Pgp	0.171242898	0.269163768	0.857	0.757	1
							Slc39a1	0.171734542	0.254107168	0.571	0.378	1
							Chmp7	0.172429672	0.254407235	0.643	0.541	1
							4932435O22Rik	0.173589861	-0.289597512	0.357	0.514	1
							Taf9b	0.17512731	0.451879147	0.786	0.811	1
							Rnaset2b	0.176547204	0.554680307	0.786	0.73	1
							Ociad1	0.180112644	0.34924018	0.929	0.946	1
							Rplp0	0.180152065	0.279949295	1	1	1
							Rps4x	0.180152065	-0.364330746	1	1	1
							Id2	0.181249643	-0.279449075	0.357	0.541	1
							Tex11	0.183258863	0.298299337	0.929	0.865	1
							Ogt	0.185459083	-0.347346061	0.714	0.838	1
							Lsm12	0.187009143	-0.261831067	0.857	0.946	1
							Rad23a	0.187622349	0.303669564	0.571	0.541	1
							Lrif1	0.188564122	0.336257071	0.714	0.703	1
							Ift27	0.189816973	-0.434945433	0.786	0.865	1
							Ift22	0.190942199	0.446564823	0.643	0.703	1
							Pgrmc1	0.192034931	0.390090476	0.857	0.757	1
							Furin	0.193373733	0.255825059	0.5	0.378	1
							Chtf8	0.194144061	0.302256037	0.643	0.541	1
							Snx2	0.194221813	-0.295249026	0.857	0.973	1
							Fundc2	0.195277372	0.271058544	0.786	0.595	1
							Pde6d	0.201042429	0.251529625	0.857	0.865	1
							Slc3a2	0.201596999	0.338388486	0.5	0.378	1
							Cited1	0.203048826	0.364936983	0.429	0.324	1
							Apoh	0.204861002	0.324340088	0.357	0.216	1
							G3bp1	0.2113065	0.254112021	0.929	0.757	1
							Wfdc15a	0.213113931	0.414513619	0.786	0.73	1
							B930036N10Rik	0.213419689	0.304387667	0.429	0.27	1
							Cetn4	0.215672107	-0.295081685	0.786	0.838	1
							Morf4l1	0.216922606	0.308643387	1	1	1
							Sumo3	0.216922606	-0.285965416	0.929	1	1
							Id3	0.21708976	-0.611731382	0.286	0.432	1
							Wtap	0.221868108	0.358679723	0.714	0.784	1
							Prdm9	0.222393413	0.262327689	0.429	0.297	1
							Gm26620	0.223010064	-0.302129077	0.214	0.351	1
							Suv39h1	0.235149835	0.262364668	0.643	0.649	1
							Xdh	0.236106943	-0.33108794	0.429	0.595	1
							Hdac5	0.238694972	0.277766881	0.5	0.432	1
							Ajuba	0.243945228	-0.31275597	0.714	0.703	1
							Tmed7	0.246082618	0.288482545	0.786	0.73	1
							Amd1	0.249871758	0.262654574	0.714	0.649	1
							Dynlt1a	0.252494872	0.28675103	0.571	0.459	1
							Rsrc2	0.272386764	0.272012388	0.929	0.973	1
							Cdca2	0.285825291	0.294853277	0.571	0.486	1
							Fus	0.286360925	0.250076546	1	0.892	1
							Izumo1r	0.289008566	0.417319557	0.357	0.243	1
							Epcam	0.292110723	-0.30406593	0.714	0.757	1
							Prpf38b	0.295737001	-0.260527283	0.857	0.892	1
							Tob2	0.306598906	0.25044467	0.571	0.486	1
							Fabp3	0.324612766	-0.258000553	0.286	0.405	1
							Bola3	0.326513339	0.270703995	0.5	0.541	1
							Gml	0.332293303	0.3194164	0.5	0.405	1
							Kmt2c	0.336259529	-0.251254234	0.714	0.919	1
							Ccne2	0.346615006	0.746352558	0.571	0.541	1
							Suco	0.354547184	0.298826261	0.786	0.73	1
							Gm44113	0.356378103	0.271120545	0.5	0.378	1
							Tex19.1	0.36354633	0.307692557	0.714	0.703	1
							Fgfr1op2	0.369652938	0.27791064	0.929	0.946	1
							H2-K1	0.383720807	0.745511592	0.643	0.676	1
							Zfp958	0.383720807	-0.270094204	0.571	0.703	1
							Suclg2	0.386561796	0.265047398	0.714	0.703	1
							Tma7	0.386721627	0.274531896	0.929	0.919	1
							Zfp53	0.38680581	0.272778472	0.286	0.189	1
							Ifnar1	0.399438389	0.253580665	0.5	0.514	1
							Ube2t	0.433954256	0.275394506	0.786	0.865	1
							Marf1	0.439817567	0.497946393	0.857	0.811	1
							Stmn1	0.453679847	0.271562617	0.929	1	1
							Dnajb4	0.460978356	0.286215882	0.714	0.514	1
							Fignl1	0.471212702	0.264864197	0.643	0.676	1
							Cdkn2a	0.494568129	0.260114316	0.429	0.378	1
							H1f0	0.498591568	0.274971608	0.786	0.865	1
							Oard1	0.505943163	0.267212114	0.786	0.946	1
							Vapb	0.506294785	0.255724493	0.643	0.703	1
							Gm40538	0.764491229	0.487992673	0.357	0.405	1
							Gm15389	0.764491229	-0.583494436	0.5	0.351	1
							Xlr4c	0.79114314	0.304385872	0.714	0.838	1
							Hccs	0.807976539	0.280436208	0.929	0.838	1
							Acat2	0.818618819	0.266356331	0.143	0.135	1
							Hist1h1c	0.989765831	0.275563493	0.286	0.324	1
